# Supplementary material for: Topic-driven toxicity: Exploring the relationship between online toxicity and news topics
Source: PLoS One. 2020 Feb 21;15(2):e0228723. doi: 10.1371/journal.pone.0228723 (PMC7034861; doi:10.1371/journal.pone.0228723)
Supplement: S2 File — (XLSX) [file pone.0228723.s002.xlsx]

## Sheet: Comments
The data is sourced from "all videos with topic and toxicity upwork_v2.xls" (as of 23/08/2018)
Superclass "Religion" has only 3 videos. Those videos were excluded.
Adjustments to account for multiple comparisons:
					Bonferroni
					Sidak
					Scheffe

## Sheet: videos
ID	video_id	title	description	avg_comment_toxicity	published_at_x	toxicity	toxicity_title	toxicity_desc	topic	Superclass	Superclass_N
1	PS7l-4jQ2KQ	Remembering Sir David Frost	Leading figures from the world of politics, journalism and showbusiness have been remembering Sir David Frost at a memorial service at Westminster Abbey in London. About 2,000 guests paid tribute to the broadcaster, who died in August of last year. The world's most powerful wanted to be interviewed by Frost, who was a journalist, broadcaster and celebrity. Al Jazeera's Laurence Lee reports from L…	0.0024936	2014-03-18T12:17:48.000Z	0.0024935957	0.05650598	0.0024408116	europe	europe	6
2	aC_bIjhwH4E	Thousands left homeless in Iraq's Diyala	After five days of intense fighting in Diyala Province, Iraqi and Kurdish Peshmerga forces have managed to push back the ISIL advance. Many have been killed, and thousands left homeless. Ahmed Nasir is one such resident, who lived under ISIL and then survived the battle for Diyala. Al Jazeera's Imran Khan sent this exclusive report from Baghdad.	0.00368844	2014-11-28T12:14:43.000Z	0.0036884411	0.35281637	0.079788044	iraq	middle east	12
3	9vHqHhvJlfU	Georgetown University professor analyses Egypt crisis	Abdullah Al Arian, an assistant professor at Georgetown University in Doha, analyses Egypt crisis.	0.00391912	2013-08-24T12:57:24.000Z	0.003919122	0.049500782	0.015338902	egypt	middle east	12
4	TMV_Pj7FzkY	Witness - Warriors from the North promo	A chilling and courageous account from a Danish-Somali boy in Copenhagen who fell victim to recruiters from the militant group al-Shabab. Subscribe to our channel http://bit.ly/AJSubscribe Follow us on Twitter https://twitter.com/AJEnglish Find us on Facebook https://www.facebook.com/aljazeera Check our website: http://www.aljazeera.com/	0.00408655	2015-08-11T02:22:47.000Z	0.004086548	0.101274334	0.15562822	africa	africa	1
5	LAV9waTwgbw	The Cure - Episode 1: Self-screening Revolution	Subscribe to our channel http://bit.ly/AJSubscribe Subscribe to our channel http://bit.ly/AJSubscribe Unlike other forms of cancer, cervical cancer is easily preventable and treatable - yet it still kills a quarter of a million women each year. At Al Jazeera English, we focus on people and events that affect people's lives. We bring topics to light that often go under-reported, listening to all s…	0.00516054	2013-06-03T14:59:36.000Z	0.0051605403000000005	0.04641675	0.04289401	media	media	11
6	uXNBPudwwJ4	Behind Al Jazeera's new series: Science in a Golden Age	'These are untold stories, these are fascinating characters, these are geniuses who developed science, and what is sad is that not only are they not well known in the West, they are not well known in the Islamic and Arabic-speaking world.' 'Science in a Golden Age' is a new six-part series that premiered on Al Jazeera English​ this week. It contextualizes today's modern scientific developments by…	0.00529074	2015-10-09T08:32:59.000Z	0.0052907425	0.021387583	0.103611805	science & technology	science & technology	17
7	KB_YH9EsFcI	Panama Canal Expansion set to open next month	Bigger ships will be able to take a shortcut between the Atlantic and Pacific oceans from next month. A third shipping lane is opening on the Panama Canal. Al Jazeera’s Natasha Ghoneim reports from Panama City. - Subscribe to our channel: http://bit.ly/AJSubscribe - Follow us on Twitter: https://twitter.com/AJEnglish - Find us on Facebook: https://www.facebook.com/aljazeera - Check our website: h…	0.00532499	2016-05-26T17:25:23.000Z	0.0053249905000000005	0.04023063	0.008773706	asia pacific	asia	3
8	rFbUp-guhDM	Bosnia's landmine clearance delayed	It's estimated there are still 84,000 unexploded mines left in Bosnia and Herzegovina - more than in any other European country. The landmines were laid during the Bosnian war in 1995 and were supposed to have been cleared by 2019. But the deadline has been postponed because of lack of funds to complete the job. Al Jazeera’s Rob Matheson reports. - Subscribe to our channel: http://aje.io/AJSubscr…	0.00533672	2017-02-27T08:40:40.000Z	0.005336719	0.17379482	0.036172085	europe	europe	6
9	LxCRJWYlqP8	Laos struggles to handle tourist influx	A world heritage tag is bringing more visitors to Laos than it can handle. Now the government's taking steps to try to protect top attractions, because of the growing number of tourists. Wayne Hay reports from Luang Prabang. - Subscribe to our channel: http://bit.ly/AJSubscribe - Follow us on Twitter: https://twitter.com/AJEnglish - Find us on Facebook: https://www.facebook.com/aljazeera - Check …	0.00548676	2016-04-05T01:57:02.000Z	0.0054867584	0.10253651	0.0069727404	media	media	11
10	VDwSnYEnmwk	Berlin Wall a tourist hit 25 years after fall	More than one million people are expected to mark on Sunday the 25th Anniversary of the fall of the Berlin Wall in Germany. Almost all of the wall, the main symbol of the Cold War, is now gone, but it remains a major tourist attraction. Al Jazeera's Nick Spicer reports from Berlin. Subscribe to our channel http://bit.ly/AJSubscribe Follow us on Twitter https://twitter.com/AJEnglish Find us on Fac…	0.00604953	2014-11-09T08:46:34.000Z	0.0060495290000000005	0.11681589999999999	0.040255066	europe	europe	6
11	AqkY8kSu2Kk	News: Ukraine Election May 2104 promo	Subscribe to our channel http://bit.ly/AJSubscribe Al Jazeera's Ukraine elections coverage.	0.00606662	2014-05-16T14:38:25.000Z	0.00606662	0.023900522	0.047778353	media	media	11
12	KYhjvyKvmWE	Head to Head - Paul Bremer promo	Mehdi Hasan challenges US Ambassador Paul Bremer, former Administrator of Iraq, on whether his policies led to the rise of ISIL. Subscribe to our channel: http://bit.ly/AJSubscribe Follow us on Twitter: https://twitter.com/AJEnglish Find us on Facebook: https://www.facebook.com/aljazeera Check our website: http://www.aljazeera.com/	0.00635426	2015-11-30T13:25:22.000Z	0.006354261	0.14767922	0.0035469776	africa	africa	1
13	y0Nr4gr6vZQ	Para athletic championship held in Middle East for first time	Fifth world records were broken on the opening day of the Para Athletic World Championships in Doha. It's the first time the event has been held in the Middle East.	0.00693619	2015-10-23T18:10:23.000Z	0.006936189000000001	0.02998581	0.048664875	middle east	middle east	12
14	6kTMFUSE7nk	Poor urban planning blamed for floods in southern India	As the southern Indian city of Chennai emerges from its worst flood in more than 100 years, attention is turning to why it caused so much destruction. Government critics and environmentalists say this was worse than it should have been because of poor planning. Al Jazeera's Nidhi Dutt reports from New Delhi. Subscribe to our channel http://bit.ly/AJSubscribe Follow us on Twitter https://twitter.c…	0.00711407	2015-12-08T12:34:37.000Z	0.0071140653000000015	0.24258755	0.17789795	asia	asia	3
15	twrOXL-1bto	Cambodia opposition demands fair polls	Subscribe to our channel http://bit.ly/AJSubscribe More than nine million Cambodians are heading to the polls on Sunday. The opposition is demanding free and fair elections as takes on Prime Minister Hun Sen who has been in power for 30 years. Al Jazeera's Scott Heidler reports from the capital, Phnom Penh. At Al Jazeera English, we focus on people and events that affect people's lives. We bring …	0.00714752	2013-07-27T13:20:51.000Z	0.00714752	0.054262865	0.008787556	media	media	11
16	08iJfjmuceM	Iraq police struggle to protect oil pipelines	Attacks on oil pipelines are expected to be an important issue in Iraq's upcoming parliamentary elections. The country loses millions in lost revenue and damages due to frequent attempts by armed groups, including the al-Qaeda-linked Islamic State of Iraq and the Levant, to disrupt the country's oil industry. Officers in a special police unit tasked with protecting the pipelines say they are not …	0.00719839	2014-04-25T10:32:14.000Z	0.007198393000000002	0.08980011	0.06741359	iraq	middle east	12
17	zFnPbMs1ats	Tackling Drug-Resistant TB	The first new TB drug in 40 years brings hope to patients. Arman is one of 450,000 people per year worldwide who are infected with a dangerous, mutated version of one of the world's deadliest diseases - tuberculosis (TB). The illness kills 1.3 million people per year, more than any other infectious disease apart from HIV/AIDS.	0.00738448	2015-10-08T13:59:31.000Z	0.007384476	0.23754409	0.08231082599999999	us & canada	us & canada	19
18	CPr9alGiumw	Williams F1 shifts gears to road safety	Two decades of dominance at the end of the 20th century have been followed by 15 years without a title for the Williams Formula One team. But the British constructors are thinking outside the race track, and focusing on road safety, as they try to keep up with the Red Bulls and the Ferraris. Al Jazeera's Paul Rhys reports from Doha.	0.00742641	2012-11-05T21:27:29.000Z	0.00742641	0.033477843	0.03906065	africa	africa	1
19	n04UYvmTXyw	On Al Jazeera: Hong Kong exhibit celebrates what Bruce Lee taught his fans	We've launched a daily segment for our viewers: On Al Jazeera. Some of today's stories from our correspondents around the globe: - Hong Kong exhibit celebrates what Bruce Lee taught his fans - Reopening banks offers no relief for Greek businesses - Former Chadian president goes on trial in historic case All this and more at http://www.aljazeera.com/ Subscribe to our channel http://bit.ly/AJSubscr…	0.00746403	2015-08-11T01:35:06.000Z	0.00746403	0.050503694	0.011916201	africa	africa	1
20	tt-pqIlgV1A	Tunisian entrepreneurs struggle as economy falters	One young entrepreneur is trying to inspire change, and turn things around. Struggling for cash, Tunisia's government is turning to the international bond market to raise funds. The World Bank says Tunisia's economic growth this year is expected to be near zero, at best. Unemployment is also a problem. Al Jazeera’s Nazanine Moshiri reports from Kasserine, Tunisia - Subscribe to our channel: http:…	0.00793339	2016-04-27T14:29:39.000Z	0.007933393	0.111251734	0.02796657	business & economy	business & economy	4
21	E-eyg-CsFu8	Empire - Extended interview : Seyed Hossein Mousavian	Subscribe to our channel http://bit.ly/AJSubscribe Seyed Hossein Mousavian is a research scholar at the Program on Science and Global Security at Princeton University. He has served as the head of the foreign relations committee of Iran’s National Security Council from 1997-2005. He has also been a spokesman for Iran during its nuclear programme negotiations between 2003 and 2005 with the Europea…	0.00794755	2013-12-31T01:19:44.000Z	0.0050716493	0.011648116000000002	0.022511486	iran	middle east	12
22	HWwa1sOjvYM	Vermeer work headlines Dutch museum reopening	One of Europe's most renowned art galleries in The Hague is re-opening its doors, after a two-year shutdown for renovations, and it hopes to attract a quarter million visitors a year. Al Jazeera's Nadim Baba reports from The Hague. Subscribe to our channel http://bit.ly/AJSubscribe Follow us on Twitter https://twitter.com/AJEnglish Find us on Facebook: https://www.facebook.com/aljazeera Check our…	0.00833699	2014-06-21T21:50:49.000Z	0.008336991	0.015936451	0.013069874	africa	africa	1
23	ez8DA4iDbKc	Indonesia: Assessing President Widodo's first year in office	Indonesia's President Joko Widodo delivered his second State of the Nation address on Tuesday in Jakarta. Despite rising poverty and widespread corruption, Widodo's approval rating has risen dramatically in his first year in office. Al Jazeera’s Step Vaessen reports from Jakarta. - Subscribe to our channel: http://aje.io/AJSubscribe - Follow us on Twitter: https://twitter.com/AJEnglish - Find us …	0.00837837	2016-08-16T15:26:08.000Z	0.008378369	0.040064268	0.064872585	africa	africa	1
24	_zRUzUjkhUo	Spokesman for Maliki's party discusses his resignation	Zuhair Al Nayer, the UK spokesman for the Iraqi Dawa party, says Nouri al-Maliki's resignation is a success for Iraqi democracy. Subscribe to our channel http://bit.ly/AJSubscribe Follow us on Twitter https://twitter.com/AJEnglish Find us on Facebook https://www.facebook.com/aljazeera Check our website: http://www.aljazeera.com/	0.00837837	2014-08-15T01:58:53.000Z	0.008378369	0.054960165	0.053145975	africa	africa	1
25	8YRNFzxLGt4	Can technology help boost Thailand rice production?	Thailand has hosted its largest ever technology conference. One exhibitor believes he has come up with a way to revolutionise agriculture. Al Jazeera’s Imran Khan explains. - Subscribe to our channel: http://aje.io/AJSubscribe - Follow us on Twitter: https://twitter.com/AJEnglish - Find us on Facebook: https://www.facebook.com/aljazeera - Check our website: http://www.aljazeera.com/	0.00840978	2016-10-09T17:17:39.000Z	0.008409785	0.0037007215	0.011802785	science & technology	science & technology	17
26	HZ3V3OUcoSw	Turkey's president visits mining accident site	There have been dozens of funerals in Turkey for the miners who were killed in an explosion on Tuesday. President Abdullah Gul has been visiting the site where at least 282 people lost their lives. He expressed his sympathies, but many Turks are angry about poor safety standards, following the country's worst mining accident. Turkey's biggest union is about to stage a strike. Al Jazeera's Andrew …	0.00862729	2014-05-15T17:17:13.000Z	0.008627289	0.16714348	0.13909423	middle east	middle east	12
27	bXPeTy7aDRE	Rebels to sign peace deal with Mali government	In Mali, rebels are expected to sign a peace deal with the government in the capital Bamako on Saturday. It will focus on better representation for the north but not the autonomy rebels have spent decades fighting for. Mohammad Vall reports.	0.00868361	2015-06-20T13:30:12.000Z	0.0086836135	0.23754409	0.047346927	latin america	latin america	10
28	MJEfV3jv1GM	Mexico arrests alleged drug cartel lieutenant	The police in Mexico have captured an alleged former Sinaloa drug cartel lieutenant accused of involvement in the killings of more than 350 people found in various mass graves in 2011, officials have said. Al Jazeera's Lucia Newman reports from Mexico City.	0.0090695	2013-08-30T06:38:42.000Z	0.009069498	0.36775708	0.030667908	latin america	latin america	10
29	FzZesudXBjQ	Response team arrives to remote island in the Philippines	A week after the storm many people are without food, clean water and medical services, because even brining in aid can be hazardous. Al Jazeera's Craig Leeson reports from Bantayan Island.	0.00926932	2013-11-17T04:35:53.000Z	0.0092693195	0.031808455	0.052833486	asia pacific	asia	3
30	vCJnsYkuo2o	Rwanda banks on coffee amid falling commodity prices	Many African countries have been hit hard by the global commodities slump, as demand for natural resources such as oil and copper fall. Rwanda is hosting the World Economic Forum and it's hoping to impress delegates with its plans to move away from exporting raw materials. Al Jazeera’s Tania Page has more. - Subscribe to our channel: http://bit.ly/AJSubscribe - Follow us on Twitter: https://twitt…	0.00948921	2016-05-12T20:05:14.000Z	0.009489213	0.030427694	0.057730366	africa	africa	1
31	_MbhoZTe0Tg	UN to discuss report claiming Kony location	The United Nations Security Council is set to discuss a report that could narrow the hunt for the fugitive rebel leader, Joseph Kony. The head of the Lord's Resistance Army is wanted for crimes against humanity, including rape and using child soldiers. An African Union task force with 5,000 soldiers and backed by US special forces and aircraft is currently searching a vast area of central Africa …	0.00951529	2014-05-12T07:02:38.000Z	0.009515292	0.11699372	0.122042485	africa	africa	1
32	dsgwrGDFTQo	US: Artists exhibit work in historic bunkers	A group of artists from countries including Syria, Iran and Cuba are using an historic setting in the US to showcase their work. The exhibit called homeland security includes the works of 18 different artists from 12 different countries at a former military base near San Francisco Bay. Al Jazeera's Allen Schauffler reports from the exhibition. - Subscribe to our channel: http://aje.io/AJSubscribe…	0.00973967	2016-09-29T20:48:55.000Z	0.009739668	0.14319412	0.006793319	africa	africa	1
33	eCm1LY3z7Kw	Thailand invites crown prince to become new king	Thailand's cabinet has approved the appointment of a new king. Crown Prince Maha Vajiralongkorn will be invited to parliament to accept the throne in a formal ceremony following the death of his father six weeks ago.	0.00978068	2017-11-16T17:09:03.000Z	0.009780684		0.037846837	middle east	middle east	12
34	McHJGdUup50	Talk to Al Jazeera - Viviane Reding: 'Data protection is a right'	Subscribe to our channel http://bit.ly/AJSubscribe Millions of emails and phone calls have been registered, in secret, by US intelligence agencies. It seems the US government is now keeping an eye on all of us - regardless of our citizenship. The backlash has been particularly fierce in the European Union. Its justice commissioner, Viviane Reding, is demanding explanations from the US Attorney Ge…	0.00979431	2015-10-11T07:45:28.000Z	0.009794312	0.039735038	0.04096023	united states	us & canada	19
35	44r32MdqK4w	The Stream promo	The Stream is a social media community with its own daily TV show.	0.00985583	2016-12-08T10:55:04.000Z	0.009855826		0.02246239	media	media	11
36	a2gNTwnxx-E	South Africa: Clinic helps HIV parents conceive safely	A clinic in South Africa is teaching HIV-positive people how to conceive safely. It advises women on how to get pregnant without transmitting the virus. Al Jazeera's Tania Page reports from Johannesburg.	0.00996566	2016-12-22T09:14:47.000Z	0.009965656		0.12979658	africa	africa	1
37	WR5kQoEzCxg	TechKnow - Voice Box	Amyotrophic Lateral Sclerosis (ALS), or Lou Gehrig's disease, is an incurable neurological disorder. It is a condition that degenerates the muscles in the body, including those in the vocal chords. ALS leaves patients paralysed and unable to speak, with only the eyes unaffected. Subscribe to our channel http://bit.ly/AJSubscribe Follow us on Twitter https://twitter.com/AJEnglish Find us on Facebo…	0.0101655	2014-11-29T12:52:50.000Z	0.010165456	0.08324194	0.05989532	science & technology	science & technology	17
38	WnSWvY47i-U	Mexico politicians face wave of attacks in run-up to election	Mexicans will vote in by elections on June 7th. Many see it as a referendum on President Enrique Peña Nieto . His government has been dealing with a wave of disappearances and apparent massacres by security forces and criminal organisations. There have been at least 70 attacks on politicians in the run up to next week's vote. Al Jazeera's Adam Raney visited Chilapa, Guerrero where two candidates …	0.0107726	2015-06-05T18:44:41.000Z	0.010772583	0.46095464	0.22150305	europe	europe	6
39	OYsRL3bA4EQ	Viewfinder - China's Little Rock Star promo	Subscribe to our channel http://bit.ly/AJSubscribe Subscribe to our channel http://bit.ly/AJSubscribe Drumming her way to fame at a renowned Chinese music school, Deqi tries to balance ambition with being a seven-year-old. At Al Jazeera English, we focus on people and events that affect people's lives. We bring topics to light that often go under-reported, listening to all sides of the story and …	0.0113593	2013-07-12T16:05:48.000Z	0.011359299	0.18907984	0.01755092	media	media	11
40	GdKfDRjteUU	Modern African art shines at Dakar’s Biennale	The work of Africa’s best contemporary artists is being celebrated in Senegal at Dakar’s 12th Biennale. It is the oldest and most well-known modern art gathering in Africa. Al Jazeera’s Nicolas Haque reports. - Subscribe to our channel: http://bit.ly/AJSubscribe - Follow us on Twitter: https://twitter.com/AJEnglish - Find us on Facebook: https://www.facebook.com/aljazeera - Check our website: htt…	0.0116222	2016-05-24T16:04:56.000Z	0.011622215	0.07610197	0.005529418	africa	africa	1
41	0HBihHoZM4U	Palestine Remix - Breaking the Siege on Gaza	PALESTINE REMIX: What does it feel like to stand up for what's just? The Free Gaza Movement remembers. Use this clip from 'Gaza We Are Coming' documentary and mix it with other clips to make your own story on Palestine using the new Remix tool on our website: http://www.palestineremix.com Like us on Facebook: English page https://www.facebook.com/PalestineRemix Arabic page http://www.facebook.com…	0.0119666	2014-12-06T17:33:08.000Z	0.011966646000000001	0.16631135	0.053340796	palestine	israel-palestine	9
42	uGgSoW-FW9k	Foreign Languages - Steve Chao May2014 promo	Subscribe to our channel http://bit.ly/AJSubscribe Foreign Languages - Steve Chao May2014 promo	0.0124106	2014-05-22T23:08:54.000Z	0.012410581	0.14116107	0.07107904599999999	media	media	11
43	r79PFsQnmvQ	Ruling party wins huge margin in Serbia: poll	Serbia's ruling party has declared victory in Sunday's parliamentary election. Preliminary results show the centre-right Serbian Progressive Party won about 160 out of 250 seats. The party has vowed to overhaul the nation's struggling economy and push for EU membership. Al Jazeera's Aljosa Milenkovic reports from Belgrade.	0.0124545	2014-03-17T03:29:59.000Z	0.015091671999999999	0.010931907	0.054587543	politics	politics	13
44	Pc5Qc_BW7QQ	Inside Story - promo	Al Jazeera journalists and guests dissect and discuss the day’s top story. - Subscribe to our channel: http://bit.ly/AJSubscribe - Follow us on Twitter: https://twitter.com/AJEnglish - Find us on Facebook: https://www.facebook.com/aljazeera - Check out our website: http://www.aljazeera.com/	0.0129393	2015-12-22T11:11:40.000Z	0.012939293000000001	0.04797112	0.028878838	media	media	11
45	jgjdlR4OYyU	Listening Post - Feature - Political cartoonists: Drawing controversy	Subscribe to our channel http://bit.ly/AJSubscribe We delve into the art of political satire with two of Britain's best-known cartoonists - Gerald Scarfe and Steve Bell.	0.0129555	2016-03-10T23:31:42.000Z	0.020351449	0.16470528	0.030148564	arts & culture	arts & culture	2
46	Xx8kcIpkbmc	In the 'Spotlight' with Josh Singer - The Listening Post (Feature)	With an Academy Award win for one of the most lauded films representing journalists on the big screen and another critically-acclaimed for its portrayal of one of the most controversial whistle-blowers of our time - 'Spotlight' and Julian Assange in 'The Fifth Estate', respectively - Josh Singer is well-versed in the world of media and how easily facts can be misconstrued. We speak with Singer ab…	0.0130658	2016-08-07T17:16:21.000Z	0.013065836	0.0143964	0.014301669	politics	politics	13
47	aFZaoBUkvoo	Penn State to pay $60m to Sandusky victims	A university in the United States is to pay almost 60 million dollars in damages after an American Football coach was convicted of sexually abusing young boys. Penn State was once revered for its football programme, but the arrest and conviction of former assistant coach Jerry Sandusky raised the question: at what cost? Al Jazeera's Kristen Saloomey reports.	0.0131989	2013-10-29T11:15:06.000Z	0.013198851999999999	0.046927627	0.16453119	sport	sport	18
48	7MUBhxlk0tg	Critics debate environmental impact of Xayaburi dam in Laos	The communist government of Laos says the Xayaburi dam is crucial for the economy, but critics argue that not enough research has been done on its environmental impact. Al Jazeera's Wayne Hay reports from the Xayaburi dam. - Subscribe to our channel: http://bit.ly/AJSubscribe - Follow us on Twitter: https://twitter.com/AJEnglish - Find us on Facebook: https://www.facebook.com/aljazeera - Check ou…	0.0132441	2016-09-11T13:20:33.000Z	0.013244084	0.21280003	0.11393801	business & economy	business & economy	4
49	ZT4rYOCwmOA	FIBA 3x3 World Cup gets under way in France	World’s best players of 3x3, an urban version of basketball that was recently added to the 2020 Olympics in Tokyo, are in the French city of Nantes for the 2017 FIBA 3x3 Wold Cup. The five-day tournament will see world’s best teams with three players each compete on a half court shooting at the same basket. Al Jazeera's Paul Rhys reports from Nantes. - Subscribe to our channel: http://aje.io/AJSu…	0.0132887	2017-06-20T20:21:23.000Z	0.013288715	0.17363667	0.007838247	africa	africa	1
50	jEOXViwY2sQ	Kashmir fears more devastating floods	There are fears there may be more devastating floods in Indian-Administered Kashmir. 300 people were killed in last September's deluge, and while rivers are now flowing below the danger mark, people are still worried. Al Jazeera's Nidhi Dutt reports.	0.0133229	2015-04-05T04:22:47.000Z	0.013322915	0.23754409	0.25220528	asia	asia	3
51	YOil6Yh25_E	Pakistani government and Taliban hold talks	Tentative talks between the Pakistani government and Taliban representatives have finally gotten under way. But, as Al Jazeera's Osama Bin Javaid reports, those living in Taliban strongholds remain skeptical about what will be achieved.	0.0138402	2014-02-06T21:17:06.000Z	0.013840187	0.46095464	0.1751637	afghanistan	middle east	12
52	J_21OirNFOU	TriBeCa's socially conscious video gaming	This year at the TriBeca film festival,organizers are bringing in video games as part of the festival's entertainment. Interestingly, organizers have brought in a new breed of socially conscious games that aim to plunge players into a world of moral decision making. Games like 'The Migrant Trail' and 'Papers Please' force players to confront real world issues like immigration and the human cost o…	0.0138749	2014-04-26T13:41:18.000Z	0.013874903999999999	0.14791091	0.03534932	arts & culture	arts & culture	2
53	P1urkTDjhSI	India farmers struggle despite state schemes	Subscribe to our channel http://bit.ly/AJSubscribe Subscribe to our channel http://bit.ly/AJSubscribe Farmers in the Indian state of West Bengal are struggling to stay afloat despite government procurement schemes to help them and boost national food supplies. The government sets prices at $22 for every 100kg of rice and half of the rice procured through the scheme is provided at subsidised rates…	0.0139495	2017-12-22T18:08:20.000Z	0.0151365	0.10565279	0.027348602000000003	india	asia	3
54	wJSz37sp2HM	Counting the Cost - Extra - . Interview: Bill McDermott	The CEO of German software giant SAP, Bill McDermott talks to Counting the Cost about the challenges facing Greece's new government and the eurozone.	0.0145611	2015-02-01T10:38:09.000Z	0.014561062	0.05586086	0.07190925	europe	europe	6
55	gpCaIglkS4o	Artscape - The New African Photography : Promo	Subscribe to our channel http://bit.ly/AJSubscribe Subscribe to our channel http://bit.ly/AJSubscribe The series also features Invisible Borders organiser Emeka Okereke, Kenyan Fashion photographer Barbara Minishi, Baudouin Mouanda from the Congo and South Africa's Neo Ntsoma. At Al Jazeera English, we focus on people and events that affect people's lives. We bring topics to light that often go u…	0.014569	2013-04-25T13:57:30.000Z	0.016855273	0.050341893	0.01163102	africa	africa	1
56	WR_sG8muw_E	LDP, ex-premier likely to regain power in Japan	Subscribe to our channel http://bit.ly/AJSubscribe Subscribe to our channel http://bit.ly/AJSubscribe Polls in Japan's parliamentary elections have closed with a predicted moderate turnout. Up to 40 per cent of voters were undecided before polling began. Political observers, however, predict that Liberal Democratic Party leader and former Prime Minister Shinzo Abe will return to power. Abe has se…	0.0148491	2012-12-17T10:39:36.000Z	0.014849082	0.063737415	0.015353469	politics	politics	13
57	3vSBLyAdAhA	Zanzibar votes in re-run of presidential election	People have been voting in Zanzibar in a controversial re-run of October's presidential elections. The opposition declared victory after last year's poll, but the Electoral Commission annulled the election. Al Jazeera's Malcolm Webb reports from the island of Pemba. - Subscribe to our channel: http://bit.ly/AJSubscribe - Follow us on Twitter: https://twitter.com/AJEnglish - Find us on Facebook: h…	0.0149452	2016-03-21T13:51:07.000Z	0.014945218	0.07758964	0.014676607	africa	africa	1
58	69HWRbLHu50	Libyans express little optimism with new PM	Libya's prime minister, who was recently approved in a contested parliamentary vote, was unharmed in an attack on his home that set off a gun battle with guards, a government official said. Libyans, however, are losing hope for better future with their new government. Al Jazeera's Stefanie Dekker reports from Tripoli	0.01496	2014-05-27T23:26:54.000Z	0.014960013999999999	0.04299575	0.039405800000000005	libya	africa	1
59	zY26ZgtKD48	Rio 2016: Cape Verdean boxer eyes Olympic challenge	A navy cook by day, boxer Davilson Morais is one of five Cape Verdeans to have qualified for the 2016 Rio Olympic Games. Like most small nations, the West African island struggled to form a team together. Al Jazeera’s Nicolas Haque reports from Praia. - Subscribe to our channel: http://aje.io/AJSubscribe - Follow us on Twitter: https://twitter.com/AJEnglish - Find us on Facebook: https://www.face…	0.0149905	2016-08-02T06:10:47.000Z	0.014990517	0.012636801	0.020031197	africa	africa	1
60	KI2D89HQR0I	Spain votes to end political deadlock	People are heading to the polls in Spain, for the second time in six months. The election was called because no party was able to secure an overall majority in last December's poll. It's being seen as a test of the interim prime minster’s government after years of financial austerity. Al Jazeera’s Neave Barker reports from Madrid. - Subscribe to our channel: http://bit.ly/AJSubscribe - Follow us …	0.0150127	2016-06-26T15:02:58.000Z	0.015012724	0.07522763	0.043683723	politics	politics	13
61	hxk2tyobjXA	Talk to Al Jazeera - Han-Na Chang: 'Music is joy in creation'	One of the world's most accomplished musicians discusses her role working in the male-dominated field of conducting. Han-Na Chang talks to Al Jazeera about her career and explains the importance of music in her life.	0.0150738	2017-09-04T04:32:01.000Z	0.01232879	0.025354313	0.0076149465000000015	arts & culture	arts & culture	2
62	NHag9fXnRKE	UN-mediated Syrian peace talks set to launch	After three years of war and more than 100,000 deaths, Syria's government and representatives from the opposition are set to begin talks. United Nations mediator Lakhdar Brahimi is overseeing the negotiations in Geneva and will speak to both sides separately first. It is not clear if both sides will agree to meet for direct talks. Al Jazeera's James Bays reports live from Geneva.	0.0152775	2014-01-24T11:47:35.000Z	0.01527746	0.040355545	0.0054340726	middle east	middle east	12
63	cn6JARS74Q4	Nepal marks milestone since first Everest summit victory	Subscribe to our channel http://bit.ly/AJSubscribe Subscribe to our channel http://bit.ly/AJSubscribe Wednesday marks 60 years since Tenzing Norgay and Edmund Hillary reached the summit of Mount Everest. The pair's accomplishment secured their spot in the history books. But their legacy has also transformed the lives of people living in the shadow of the world's tallest mountain. Al Jazeera's Sco…	0.0154396	2013-06-26T05:44:51.000Z	0.015439555	0.010021765	0.009646901	europe	europe	6
64	ubwyIFNkstM	Turkey's hazelnut crop devastated by frost	This year's hazelnut crop in Turkey has been devastated by freezing weather, which will have serious impacts on chocolate production. Some Turkish officials fear that the shortfall will force an exodus of farmers from the counry's hazelnut producing provinces that will have a negative effect on the local and national economy. Al Jazeera's Bernard Smith reports from Turkey's Duzce province. Subscr…	0.0155548	2014-09-05T01:32:36.000Z	0.015554846	0.050465353	0.03422193	turkey	asia	3
65	zTtjxmLCIEI	The Cure - Series 2 Generic August 2013 promo	Subscribe to our channel http://bit.ly/AJSubscribe Journey to the frontiers of world health, from cutting-edge breakthroughs to advances in affordable care.	0.0157494	2013-08-13T20:06:19.000Z	0.01574936	0.04919944	0.018277358	health	health	7
66	WofFeqUmHcM	Post Script - John Hendren - Women's TV in Afghanistan promo	- Subscribe to our channel: http://aje.io/AJSubscribe - Follow us on Twitter: https://twitter.com/AJEnglish - Find us on Facebook: https://www.facebook.com/aljazeera - Check our website: http://www.aljazeera.com/	0.0159708	2017-06-08T13:54:00.000Z	0.015970761	0.04444549	0.0071871737	media	media	11
67	19-bRyY2mUk	Myanmar seeks to kickstart fragile peace talks	Myanmar seeks to kickstart fragile peace talks Talks to end decades of ethnic conflicts in Myanmar are underway in the capital Naypyidaw. But some groups invited to the negotiations have boycotted the conference. Al Jazeera's Florence Looi reports from Naypyidaw, Myanmar. - Subscribe to our channel: http://aje.io/AJSubscribe - Follow us on Twitter: https://twitter.com/AJEnglish - Find us on Faceb…	0.0159939	2017-05-25T00:31:08.000Z	0.015993945	0.08034753	0.01052624	myanmar	asia	3
68	lmPNay6KD_A	Kristen Saloomey speaks to South Sudan's Foreign Minister	Subscribe to our channel http://bit.ly/AJSubscribe Subscribe to our channel http://bit.ly/AJSubscribe Al Jazeera's Kristen Saloomey spoke to South Sudan's Foreign Minister Nhial Deng Nhial. He told Al Jazeera the border issues have to be solved before the countries can move on. At Al Jazeera English, we focus on people and events that affect people's lives. We bring topics to light that often go …	0.0160294	2012-08-15T03:06:35.000Z	0.016029438	0.04289848	0.014701956	africa	africa	1
69	322ulhrk3fo	Karzai's former top envoy eyes presidency	A day before the national and local elections in Afghanistan, President Hamid Karzai is urging people not to be intimidated by rising violence, and threats from the Taliban. One of the leading candidates in the presidential race is Karzai's former Foreign Minister Zalmai Rassoul. Rassoul said that he has the experience to run the country, but his ties with the corrupt-ridden government of Karzai …	0.0160507	2014-04-04T14:41:39.000Z	0.01605068	0.041085187	0.18542139	afghanistan	middle east	12
70	QQZ8xa9k-fc	South Sudan: Is the August peace deal unraveling?	Recent fighting has many worried that August's peace deal could be unraveling. Al Jazeera's Haru Mutasa traveled to a camp for internally displaced people in the northern city of Wau to gauge the mood. - Subscribe to our channel: http://aje.io/AJSubscribe - Follow us on Twitter: https://twitter.com/AJEnglish - Find us on Facebook: https://www.facebook.com/aljazeera - Check our website: http://www…	0.0161817	2016-07-09T18:39:15.000Z	0.016181687	0.051951617	0.016591012	africa	africa	1
71	KHrOrzXnUDY	The Stream - Is work-life balance a myth?	Follow The Stream and join Al Jazeera’s social media community: This episode’s story: http://stream.aljazeera.com/story/201701100022-0025355 FACEBOOK: http://www.facebook.com/AJStream TWITTER: https://twitter.com/AJStream GOOGLE+: http://google.com/+TheStream ****************************************­************ On The Stream: A new law in France gives employees the “right to disconnect”. The Str…	0.0162492	2017-01-10T23:03:06.000Z	0.016249167		0.12416636	science & technology	science & technology	17
72	zzq8WZhqhdc	The Cure - Mental Health in Liberia	Subscribe to our channel http://bit.ly/AJSubscribe Subscribe to our channel http://bit.ly/AJSubscribe On The Cure : How newly-trained Liberian clinicians are providing mental healthcare across the country for the first time; and how one man's surgery shape our understanidng of memory function. At Al Jazeera English, we focus on people and events that affect people's lives. We bring topics to ligh…	0.0163422	2016-04-27T03:38:37.000Z	0.016342218999999998	0.15353735	0.026040377000000003	media	media	11
73	YFKHLvZ13FY	Mars 'flying saucer' splashes back to Earth	A NASA helium balloon carrying a saucer-shaped vehicle into the Earth's atmosphere, has successfully landed in the Pacific Ocean. The $150 million experimental flight is testing technology for future Mars missions. Al Jazeera's Tarek Bazley reports. Subscribe to our channel http://bit.ly/AJSubscribe Follow us on Twitter https://twitter.com/AJEnglish Find us on Facebook https://www.facebook.com/al…	0.0163422	2014-06-29T10:50:04.000Z	0.016342243	0.300874	0.038546704	asia pacific	asia	3
74	uxjn1BUPE70	Yemen's army sends reinforcements south	Yemen’s army has sent additional troops to the country's south where fighting continues in al-Qaeda controlled towns. Gains made by the army a week ago were reversed when fighters launched a surprise attack. The army said it is now concentrating its efforts on Houta, the armed group's last stronghold in Shabwa province. Al Jazeera's Hashem Ahelbarra reports from Sanaa.	0.0166195	2014-05-18T02:01:15.000Z	0.016619503	0.23754409	0.040672626	middle east	middle east	12
75	-nH1uyFjGYA	Dubai wins race to host 2020 World Expo	The success of Dubai's bid, which beat stiff competition on Wednesday from Yekaterinburg in Russia, Brazil's Sao Paulo and Izmir in Turkey, marks an impressive economic recovery since the country's near financial collapse between 2008 and 2010.	0.0167971	2013-11-29T11:53:35.000Z	0.016797086	0.11095384	0.014899136499999997	middle east	middle east	12
76	1h08kG8XDmI	Al Jazeera World - The Power and the Pain	We trace the reasons for the split between north and South Sudan and its impact on the lives of ordinary South Sudanese.	0.0172209	2014-03-15T17:11:35.000Z	0.01722089	0.15525433	0.030427767	africa	africa	1
77	VYzbnaggPbQ	The changing landscape of Al Jazeera's coverage	It has been 10 years since Al Jazeera English first went on the air. In that time, the digital landscape has evolved, allowing the media outlet to be more connected than ever. Al Jazeera’s Kamahl Santamaria reports.	0.0172243	2016-11-16T16:45:06.000Z	0.017224327	0.040198904	0.009893061	europe	europe	6
78	5hTDl7HAb1s	News Bulletin - 09:35 GMT update	Subscribe to our channel http://bit.ly/AJSubscribe Subscribe to our channel http://bit.ly/AJSubscribe The main headlines on Al Jazeera English, featuring the latest news and reports from around the world. At Al Jazeera English, we focus on people and events that affect people's lives. We bring topics to light that often go under-reported, listening to all sides of the story and giving a 'voice to…	0.017487	2012-11-23T23:02:45.000Z	0.01786367	0.029683022000000007	0.010634261	europe	europe	6
79	lQF6fEwA6lE	Viewfinder - Latin America: Liberating a Prison promo	Subscribe to our channel http://bit.ly/AJSubscribe Honduras has become a very dangerous place. For one group art may be their act of resistance and an abandoned prison, their sanctuary.	0.0175367	2014-03-25T15:03:50.000Z	0.017536743	0.33578062	0.17948501	latin america	latin america	10
80	Uv--2KMmOIc	Fans pay final tribute to music legend Juan Gabriel	Hundreds of thousands of people gathered in the heart of Mexico City to say their final goodbye to singer Juan Gabriel. The Latin legend died last week of a heart attack aged 66. Al Jazeera’s Adam Raney reports from the Mexican capital. - Subscribe to our channel: http://aje.io/AJSubscribe - Follow us on Twitter: https://twitter.com/AJEnglish - Find us on Facebook: https://www.facebook.com/aljaze…	0.0175827	2016-09-06T10:54:04.000Z	0.017582705	0.08246482	0.04717638	latin america	latin america	10
81	HVpR78u6J0g	Corruption cases highlight Brazil's big challenge	The mayor of a small Brazilian town in the northeastern Maranhao state has turned herself in after being on the run for a month. The 25-year-old has been accused of stealing more than $4m from public funds. A second mayor in the same state has been also being accused of misappropriating funds set aside for school buses. As Virginia Lopez reports from Bacuri, critics say corruption is rampant in B…	0.0177925	2015-09-29T09:40:23.000Z	0.017792495	0.2411816	0.14858778	africa	africa	1
82	wHRLuOo-c30	Lisbon Web Summit: More than 50,000 attend conference	More than 50,000 people are attending Europe's largest technology summit in Portugal. It is the first time the Web Summit has been held outside Dublin. Hundreds of start-ups are hoping to find investors to help grow their companies. Al Jazeera’s Tarek Bazley reports from Lisbon. - Subscribe to our channel: http://aje.io/AJSubscribe - Follow us on Twitter: https://twitter.com/AJEnglish - Find us o…	0.0178397	2016-11-16T14:29:05.000Z	0.01783969	0.013905163	0.010006656	africa	africa	1
83	67p7-e11q5g	Baltimore police violate rights, US report says	A US Justice Department report says Baltimore police unfairly stop and arrest African-Americans and often use excessive force. It's the result of an investigation following the death of Freddie Gray, a black man, in April 2015. The 25 year old suffered a fatal neck injury while in police custody, sparking weeks of violent protests. Al Jazeera’s Kimberly Halkett reports from Washington DC. - Subsc…	0.017902	2016-08-12T02:50:43.000Z	0.017902	0.30123886	0.1031888	united states	us & canada	19
84	FJdwHiG8mjs	New World Symphony trains gifted young musicians	When the New World Symphony opened its doors in the U-S four years ago, the primary goal was to train the next generation of young classical musicians. But the symphony, based in Florida, has done so much more to bring music to the masses. From Miami, Andy Gallacher reports the students have become important teachers to those that might not otherwise get the chance to learn.	0.0179105	2014-05-05T15:26:23.000Z	0.017910479	0.044118925999999996	0.0031663151000000003	arts & culture	arts & culture	2
85	sHEz-yVmvPg	Preserving South Sudan's craft heritage	Skirmishes continue in South Sudan, despite a peace deal signed in August. The two year war killed tens of thousands, and displaced 2 million. But some are returning home. One refugee is using an arts and craft project to bring people together. Al Jazeera's Anna Cavell reports. Subscribe to our channel http://bit.ly/AJSubscribe Follow us on Twitter https://twitter.com/AJEnglish Find us on Faceboo…	0.0179596	2015-12-27T11:53:16.000Z	0.017959641000000002	0.060093194	0.1003617	africa	africa	1
86	v8BoPL5s2QA	France celebrates 60 years of the iconic Citroen DS	The Citroen DS celebrates 60 years since its introduction with many of its fans gathering in Paris to mark the occasion. Connoisseurs believe it's the most innovative and beautiful car ever built. Jacky Rowland reports from a motor racing track just south of the French capital. Subscribe to our channel http://bit.ly/AJSubscribe Follow us on Twitter https://twitter.com/AJEnglish Find us on Faceboo…	0.0181684	2015-05-23T19:45:41.000Z	0.018168412	0.028491287	0.004744963	europe	europe	6
87	qPzR1XRXbs8	The World Nomad Games continue to celebrate the heritage of nomadic culture	Battling it out on horseback for a headless goat is one of the sports at this year’s World Nomad Games. A total of 23 types of sport are competing for medals at a lake resort in Kyrgyzstan. The multi-million dollar event is aimed at celebrating the regions heritage of nomadic culture. Al Jazeera's Andrew Simmons reports. - Subscribe to our channel: http://aje.io/AJSubscribe - Follow us on Twitter…	0.0182057	2017-11-11T04:25:16.000Z	0.0031532638	0.052109107	0.11306696	africa	africa	1
88	BpcVS8Vlz4s	Designer with down syndrome garners international attention	A young Guatemalan fashion designer with down syndrome is challenging perceptions of the disability.	0.0183447	2017-10-26T06:56:11.000Z	0.007828841		0.10812589	politics	politics	13
89	cTBQN0Z57iA	EgyptAir flight MS804 to Cairo disappears from radar	Egypt Air says that one of its planes headed from Paris to Cairo has gone missing. The flight dropped off the radar shortly after it made it's way into Egyptian airspace. And hasn’t been heard from since. Al Jazeera’s Mereana Hond reports. - Subscribe to our channel: http://bit.ly/AJSubscribe - Follow us on Twitter: https://twitter.com/AJEnglish - Find us on Facebook: https://www.facebook.com/alj…	0.0183601	2016-05-19T11:53:42.000Z	0.018360129	0.08798496	0.035884764	egypt	middle east	12
90	ChAB57hIiO4	reVIEW: Al Jazeera's Weekly News Highlights (April 3 - 8)	Subscribe to our channel http://bit.ly/AJSubscribe A look back at the news of the past week on Al Jazeera English that had you clicking and sharing. - For more, visit reVIEW's News Highlights page: http://www.aljazeera.com/review/news-highlights.html *** Have any questions or feedback about Al Jazeera news coverage? Send us a video comment: http://aljvideo.weebly.com/ YOUR show. YOUR view. The re…	0.0186321	2015-04-08T18:30:03.000Z	0.018632061999999998	0.004993823	0.046726786	media	media	11
91	A4FATV1SE3E	Rebel Architecture - Guerrilla Architect promo	Subscribe to our channel http://bit.ly/AJSubscribe Santiago Cirugeda is a legend of Spanish self-build, but can his collective approach turn an abandoned factory into a vibrant cultural centre?	0.0186382	2014-08-11T17:13:06.000Z	0.018638197	0.104291014	0.023489984	middle east	middle east	12
92	ut8sizzBdUk	In Peru’s Andes, brutal cold snap kills thousands of alpacas	Peru's government has declared a state of emergency in the southern Andes after a cold snap killed 50,000 alpacas. More than 100,000 families rely on the animals and the wool they produce for their livelihoods. They are worried that if the weather deteriorates further, the consequences could be devastating. Alexi O'Brien reports. - Subscribe to our channel: http://aje.io/AJSubscribe - Follow us o…	0.018647	2016-07-21T15:45:24.000Z	0.018646955	0.5057343	0.11535697	europe	europe	6
93	6pHcCTGGrsc	After School: Where Art Meets Technology - Rebel Education	At TUMO, technology and art merge to provide teens with a competitive edge in a digital world. With access to state-of-the-art technology and some of the world's leading professionals in web design, robotics, animation, film, music and much more, TUMO teens are encouraged to tap into their entrepreneurial intuitions to create and expand the boundaries of today's cutting-edge industries. The film …	0.0189088	2017-01-18T07:36:36.000Z	0.010555808		0.0069483006	arts & culture	arts & culture	2
94	GutpNOggm9w	Turning 'likes' into votes	Subscribe to our channel http://bit.ly/AJSubscribe Ghana's presidential candidates turn to social media for votes. At Al Jazeera English, we focus on people and events that affect people's lives. We bring topics to light that often go under-reported, listening to all sides of the story and giving a 'voice to the voiceless.' Reaching more than 270 million households in over 140 countries across th…	0.0190256	2012-12-05T01:50:53.000Z	0.01902558	0.09063927	0.016208116	media	media	11
95	bqE4Twzh6gE	UNESCO meets to decide new World Heritage Sites	The United Nations' World Heritage Committee is meeting in Istanbul for the next week and a half. It's deciding on which new sites will be added to the UNESCO World Heritage list. It will also review the conservation efforts at existing locations. Al Jazeera’s Gerald Tan reports. - Subscribe to our channel: http://bit.ly/AJSubscribe - Follow us on Twitter: https://twitter.com/AJEnglish - Find us …	0.0194407	2016-07-10T20:52:36.000Z	0.019440735	0.04424158	0.01349556	politics	politics	13
96	F-DRsblIcoc	Pope Francis wraps up South American papal tour in Paraguay	Pope Francis, the leader of the Roman Catholic Church, has wrapped up his visit to South America with a Mass attended by a million pilgrims in Paraguay. The theme of the Mass was corruption, which Francis called the 'gangrene of society'. Lucia Newman reports	0.0195352	2015-07-13T03:57:37.000Z	0.019535234	0.20125352	0.13362715	latin america	latin america	10
97	ODWC7b1SQ_4	Namesake fan remembers meeting Muhammad Ali	Muhammad Ali fan shares his story of how as a 10-year-old boy he met his hero with whom he shared the same name and common Muslim belief. - Subscribe to our channel: http://bit.ly/AJSubscribe - Follow us on Twitter: https://twitter.com/AJEnglish - Find us on Facebook: https://www.facebook.com/aljazeera - Check our website: http://www.aljazeera.com/	0.01968	2016-06-10T18:34:48.000Z	0.019679992	0.018782694	0.0015490291	us & canada	us & canada	19
98	5BfZoIce1o8	Warm welcome for returning DRC politician	Thousands lined the streets for the homecoming of opposition politician Etienne Tshisekedi in the Democratic Republic of Congo. He has spent the past two years in Belgium undergoing medical treatment. Al Jazeera’s Malcolm Webb reports from Kinshasa. - Subscribe to our channel: http://aje.io/AJSubscribe - Follow us on Twitter: https://twitter.com/AJEnglish - Find us on Facebook: https://www.facebo…	0.0197417	2016-07-28T05:52:01.000Z	0.01974167	0.18119128	0.0367476	africa	africa	1
99	l3kOLgMefAY	Hong Kong's film industry set to revive itself with new talent	Many young new directors are making their debut at this year’s international film festival. Hong Kong-made films are stealing the show. It is hoped home-grown talent telling local stories will revive the semi-autonomous Chinese territory’s film industry. Al Jazeera's Divya Gopalan reports from Hong Kong. - Subscribe to our channel: http://aje.io/AJSubscribe - Follow us on Twitter: https://twitter…	0.0198909	2017-04-22T17:30:10.000Z	0.019890900000000003	0.0147222625	0.04554563	arts & culture	arts & culture	2
100	O6D2aSy36Hw	The Listening Post - March 2016 promo	A weekly programme that examines and dissects the world's media. - Subscribe to our channel: http://bit.ly/AJSubscribe - Follow us on Twitter: https://twitter.com/AJEnglish - Find us on Facebook: https://www.facebook.com/aljazeera - Check our website: http://www.aljazeera.com/	0.0200063	2016-03-15T20:38:54.000Z	0.020006292	0.051239807000000005	0.028791418	media	media	11
101	e3PncdyxSU8	FARC rebels in Colombia attempt to re-enter society	One year has passed since the Colombian government began peace talks with the Revolutionary Armed Forces of Colombia (FARC). If a deal is reached, thousands of former rebels will have to be reintegrated into society but previous efforts have proven they are often rejected. Al Jazeera's Alessandro Rampietti brings us this reports from Villavicencio.	0.0200335	2013-10-20T02:55:13.000Z	0.020033497	0.30687228	0.09004982	latin america	latin america	10
102	cMd9pZOYM5s	Al Jazeera Correspondent - Coming Soon promo	Subscribe to our channel http://bit.ly/AJSubscribe Al Jazeera Correspondents returns for a third series of close-up and personal films from the heart of stories that have affected and shaped their lives.At Al Jazeera English, we focus on people and events that affect people's lives. We bring topics to light that often go under-reported, listening to all sides of the story and giving a 'voice to t…	0.0201118	2013-10-16T12:29:24.000Z	0.013432056000000001	0.06485053	0.012081982	media	media	11
103	4Bvz4MbPvIM	News Bulletin - 09:35 GMT update	Subscribe to our channel http://bit.ly/AJSubscribe The main headlines on Al Jazeera English, featuring the latest news and reports from around the world. The main headlines on Al Jazeera English, featuring the latest news and reports from around the world. Subscribe to our channel http://bit.ly/AJSubscribe Follow us on Twitter https://twitter.com/AJEnglish Find us on Facebook https://www.facebook…	0.0202131	2014-12-27T11:09:10.000Z	0.020213053999999998	0.029683022000000007	0.019441687	media	media	11
104	qPdqg4ugWw4	India's new regulations see families evicted	A series of building collapse incidents in India has prompted the government to propose new measures to stop illegal constructions. The independent regulator will also have the power to prosecute rogue builders. But residents of the illegally constructed buildings will be left with consequences as they face eviction. Al Jazeera's Sohail Rahman reports from Thane, India's most populated district.	0.0202677	2013-09-30T09:23:16.000Z	0.02026772	0.26209158	0.061720677	asia	asia	3
105	JopImA58no4	David Foster - News Presenter promo	An insight into Al Jazeera English by those who present the news live from our broadcast centres in Doha and London.	0.0204034	2016-01-13T20:44:16.000Z	0.020403428	0.09838437	0.04099894	europe	europe	6
106	ttm3uW6yzSc	Earthrise - Saving Rare Species in the Seychelles	We are losing species across all parts of our ecosystem at a thousand times the natural rate. Within this loss of biodiversity are species that are often extremely unusual in the way they look, live and behave, and that represent a significant amount of unique evolutionary history. The Zoological Society of London has set up the EDGE of Existence programme, which highlights and conserves one-of-a…	0.0204157	2015-04-24T00:16:23.000Z	0.020415744	0.10850347	0.056113154000000005	united kingdom	europe	6
107	t-HkdiUWDvw	The Cure - Episode 2: Magnetic heart operation	Subscribe to our channel http://bit.ly/AJSubscribe Subscribe to our channel http://bit.ly/AJSubscribe Millions of people suffer from a potentially fatal irregular heartbeat, which is often caused by problems with the heart's electrical system. But now a pioneering procedure, involving two giant magnets steered by a joystick, is helping treat patients with faulty heart rhythms. At Al Jazeera Engli…	0.0204456	2016-09-12T01:44:25.000Z	0.008518329	0.008876604	0.025487704	europe	europe	6
108	CGy9vVJDsmQ	Colombia: FARC rebels to disarm at transition zones	Thousands of FARC rebels in Colombia are gathering into 26 transition zones across the country, bringing 52 years of war to an end. The rebels, who will stay in the transition areas for up to six months, will hand over their weapons before reintegrating into civilian life. Al Jazeera's Alessandro Rampietti reports from Pondores. - Subscribe to our channel: http://aje.io/AJSubscribe - Follow us on…	0.0205319	2017-02-02T13:11:43.000Z	0.020531883	0.14818372	0.038830537000000005	war & conflict	war & conflict	20
109	BEdxRx9PNcA	Lauren Taylor - News Presenter promo	An insight into Al Jazeera English by those who present the news live from our broadcast centres in Doha and London.	0.0208006	2015-10-17T22:16:34.000Z	0.020800607	0.10199639	0.04099894	europe	europe	6
110	WcGG__5cnps	earthrise - Driving Change promo	- Subscribe to our channel: http://aje.io/AJSubscribe - Follow us on Twitter: https://twitter.com/AJEnglish - Find us on Facebook: https://www.facebook.com/aljazeera - Check our website: http://www.aljazeera.com/	0.0210645	2017-06-14T12:48:37.000Z	0.021064497999999997	0.1311467	0.0071871737	africa	africa	1
111	hqV2j05Ydvk	earthrise - The Power of a Calm Sea	As our global demand for power increases so does our pollution, with energy-related CO2 emissions expected to rise by 50 percent in the next 15 years. Our reliance on finite and polluting fossil fuels is unsustainable and the need for renewable energy is greater than ever. One alternative is tidal power. The vast majority of our planet is covered with constantly moving oceans and currents – and t…	0.0211462	2015-05-18T11:21:29.000Z	0.021146214	0.111883335	0.018772785	environment	environment & weather	5
112	EbKQ_3XYSyI	101 East - India’s Love Detectives promo	Hiring private detectives to investigate lovers is big business in India, as modern technology challenges age-old tradition. More from 101 East on: YouTube - http://aje.io/101eastYT Facebook - http://facebook.com/101east Twitter - http://twitter.com/aj101east Instagram - http://instagram.com/aj101east Website - http://aljazeera.com/101east	0.0213975	2016-05-06T13:02:16.000Z	0.021397477	0.044296417000000005	0.023719955	asia	asia	3
113	mD4Y7uKf2_Q	Talk to Al Jazeera - South Sudan promo	- Subscribe to our channel: http://aje.io/AJSubscribe - Follow us on Twitter: https://twitter.com/AJEnglish - Find us on Facebook: https://www.facebook.com/aljazeera - Check our website: http://www.aljazeera.com/	0.0215048	2016-07-07T16:50:00.000Z	0.021504823	0.05955558	0.0071871737	africa	africa	1
114	YiJNs9vmvKQ	Lifelines - River of Hope	Subscribe to our channel http://bit.ly/AJSubscribe Subscribe to our channel http://bit.ly/AJSubscribe River Of Hope profiles the work underway in the Senegal Basin to combat the deadly disease schistosomiasis, also known as bilharzia. The approach is novel and the results impressive.At Al Jazeera English, we focus on people and events that affect people's lives. We bring topics to light that ofte…	0.0215225	2016-05-29T14:57:27.000Z	0.030440716	0.063952595	0.011686394	media	media	11
115	S7TyHmEut1I	Home soil beckons for Pakistani cricket umpire who was shot	Umpire Ahsan Raza was shot in March 2009 when gumen attacked the touring Sri Lanka cricket team bus. Six years on, he will be standing in Pakistan's first home international since then. Joanna Gasiorowska reports	0.0216663	2015-05-22T09:14:08.000Z	0.021666339	0.38118634	0.062802546	asia	asia	3
116	QSVodvwscGY	Artscape - The New African Photography: Neo Ntsoma	Subscribe to our channel http://bit.ly/AJSubscribe Subscribe to our channel http://bit.ly/AJSubscribe Award-winning photographer Neo Ntsoma revisits DJ Cleo and the stars of South Africa's democratic dawn to take new portraits and discuss the impact of both apartheid and freedom on their lives. At Al Jazeera English, we focus on people and events that affect people's lives. We bring topics to lig…	0.0216915	2017-12-13T12:33:49.000Z	0.029821157	0.04204063	0.010331203	africa	africa	1
117	Dx-WR5aXRIE	Cleaning up Nigeria's oil industry	Nigeria's oil sector has faced allegations of government corruption for years. Nearly $30bn has been lost over the last three years. President Muhammadu Buhari says tackling graft in the oil sector is a top priority. Nigeria depends on oil for more than 80 percent of its revenues. Al Jazeera's Yvonne Ndege reports from Abuja. -Subscribe to our channel: http://bit.ly/AJSubscribe -Follow us on Twit…	0.0217165	2015-11-25T17:44:01.000Z	0.021716535	0.20744139	0.10813028	africa	africa	1
118	QXoW8p_3AwE	South2North - The dark side of diamonds	Subscribe to our channel http://bit.ly/AJSubscribe To what extent is today's mainstream diamond industry free of 'conflict diamonds'? Redi is joined by Rafael Marques de Morais, the author of Blood Diamonds: Torture and Corruption in Angola, Oladiran Bello, a specialist in African resource management at the South African Institute of International Relations, and Farai Maguwu, the director of the …	0.021883	2013-11-16T08:18:22.000Z	0.021883044	0.05432417	0.025796913	africa	africa	1
119	lFrVyjP1GD8	Listening Post - Feature: Persona non grata: The media ombudsman	Conveying criticism and holding editors to account can be a lonely task - we look at the role of the news ombudsman.	0.0218989	2013-10-13T16:06:13.000Z	0.015560885	0.040530734	0.081863746	politics	politics	13
120	Ep9aK8Zx6H4	Stream Leads 2015/04/27: #SOSBlackAustralia protests for May 1, Brazil Indigenous land rights, Adam	Subscribe to our channel http://bit.ly/AJSubscribe LEADS Title: #SOSBlackAustralia protests for May 1 Story: Indigenous Australians protest governments plans to cut funding in West Australian communities Title: Brazil Indigenous land rights Story: A proposed law that redraws boundaries for indigenous land is facing fierce opposition. Title: Adam Sandler under fire from Native American rights grou…	0.0220024	2015-04-28T06:17:09.000Z	0.02200235	0.043367784000000006	0.014803789	media	media	11
121	VxbooYUTcaM	SYRIA THE LAST ASSIGNMENT CS	The previously unseen footage of cameraman Yasser Faisal Al Jumaili offers chilling insights into the lives of rebel fighters behind Syrian frontlines – but he pays the ultimate price. Yasser spent his final 13 days in Syria, filming the men behind the battlefront, with Al Nusra Front, Ahrar Al Sham, the Free Syrian Army, Al Tawhid Brigade and ISIL, in Nov-Dec 2013. Subscribe to our channel http:…	0.0221693	2016-11-11T13:12:56.000Z	0.010814856000000001	0.10102519	0.061577182	middle east	middle east	12
122	-t9jb3sDfkg	Accra paves way in bid to map Ghana streets	Trying to move around Ghana is constant challenge in a country where few streets have names and even less are actually known. But with a new push to map the streets of Accra, the capital, it may become easier to get around. Al Jazeera's Ama Boateng reports from Accra.	0.0223974	2016-01-12T14:10:30.000Z	0.02641874	0.16511485	0.023816248	middle east	middle east	12
123	i0wgDKBiwQI	South Sudan builds national archive	South Sudan, the world's youngest country is building a national archive to salvage its history before it became independent. Al Jazeera's Anna Cavell reports from Juba. Subscribe to our channel http://bit.ly/AJSubscribe Follow us on Twitter https://twitter.com/AJEnglish Find us on Facebook https://www.facebook.com/aljazeera Check our website: http://www.aljazeera.com/	0.0224135	2014-12-03T17:42:25.000Z	0.022413485	0.0031092945	0.01448598	africa	africa	1
124	xiLdPcF0L6w	Nigerian designers use Fashion Week to promote traditional textiles	It is Fashion Week in Nigeria. Some designers are using the event to try get consumers to buy and promote the use of traditional Nigerian textiles. Al Jazeera's Yvonne Ndege has more on the ancient dyeing technique that can only be carried out by hand.	0.0226822	2015-10-31T20:21:18.000Z	0.022682194	0.044153232	0.043663397	africa	africa	1
125	dsYkCtg2iYw	Al Jazeera World - Area C promo	Instead of transferring to Palestinian control, the biggest area in the West Bank remains firmly in Israeli hands, causing serious hardship for the people there.	0.0227488	2015-10-28T10:34:04.000Z	0.022748817	0.06380315	0.24548444	israel	israel-palestine	9
126	aHKGXLP1K28	Al Jazeera World - The Oracles of Pennsylvania Avenue - Part One	This two-part series examines three individuals and their 25-year, 24/7 peace vigil in front of the White House, revealing how the bizarre act of a man labelled the 'first domestic terrorist' in the US brought them together.	0.0229245	2018-01-31T01:02:15.000Z	0.022924532999999997	0.07708601	0.12137302	donald trump	us & canada	19
127	gXwKjY1EJ94	Economic woes hit Nigeria's charities	Nigeria’s tough economic situation is making it difficult for many to be charitable in a country with a long-standing tradition of helping those in need. The World Giving Index from the Charities Aid Foundation says Nigeria has been overtaken by some other countries in terms of cash support, but still remains among the top 10 nations for volunteers offering their time to help others. Al Jazeera’s…	0.0229493	2016-10-25T05:52:13.000Z	0.022949342	0.1925773	0.0149300955	africa	africa	1
128	mG8tzNw-whc	Bill Nye on solar-sails and space travel	US-based scientists are preparing to test an innovative technology they say could change the way some spacecraft are propelled through space. The craft, called Lightsail1, will test the idea that the energy and momentum that exists in the photons in sunlight can pass on to an object. It this case a 32-square meter ultra-thin Mylar sail.	0.0229736	2015-06-27T19:57:25.000Z	0.016899833	0.037600316	0.009543794	science & technology	science & technology	17
129	Fcg4uKJ6Rlo	Palestine Remix : Love Through Prison Bars	PALESTINE REMIX: The Capsule letter was a way to communicate between inside and outside world in the prison. Use this clip from 'Deportees' documentary and mix it with other clips using the new Remix tool to make your own story on our website: http://www.palestineremix.com Like us on Facebook: English page https://www.facebook.com/PalestineRemix Arabic page http://www.facebook.com/PalestineRemixA…	0.0231098	2015-09-13T09:28:56.000Z	0.023109794	0.3889421	0.10998263	palestine	israel-palestine	9
130	UjJJTvsUPFI	Football Rebels - Promo	Subscribe to our channel http://bit.ly/AJSubscribe As the global sporting world lurches from one corruption scandal to the next, the indomitable Eric Cantona presents the stories of five football heroes whose social conscience led them to challenge unjust regimes, join opposition movements and lead the fight for democracy and human rights. Football Rebels looks at a side of football that does not…	0.0231229	2016-09-07T00:49:53.000Z	0.023122916	0.36338990000000004	0.026423046	europe	europe	6
131	754CPFQFE9E	Car maker Volkswagen under fire	The US justice department has launched a criminal investigation into the German car maker Volkswagen. US regulators found that some of its cars could manipulate emissions tests. VW is facing claims emissions tests were rigged in Europe as well. Al Jazeera's Jonah Hull reports from London. Subscribe to our channel http://bit.ly/AJSubscribe Follow us on Twitter https://twitter.com/AJEnglish Find us…	0.0232041	2015-09-23T00:30:51.000Z	0.023204131	0.12447644	0.10849042	europe	europe	6
132	DLyYOrKs9sA	Life on Hold- Maya Promo	Subscribe to our channel http://bit.ly/AJSubscribe Subscribe to our channel http://bit.ly/AJSubscribe 7-year-old Maya lives in a run-down refugee’s apartment in the Sabra and Shatila Camps. Trapped at home she whiles away the hours watching cartoons . The struggle of Syrian refugees in Lebanon. At Al Jazeera English, we focus on people and events that affect people's lives. We bring topics to lig…	0.0232295	2015-03-15T14:59:15.000Z	0.023229537999999997	0.050224196	0.02704083	media	media	11
133	IThyQLVl2T4	World Trade Center now tallest US building	The new World Trade Center tower in New York is officially the tallest building in the United States. But the record didn't come without a fight from Chicago, whose Willis Tower has lost the title. Some also argue that the spire on top is nothing more than a glorified antenna. Al Jazeera's Kristen Saloomey reports.	0.0232586	2013-11-13T23:10:15.000Z	0.022565448999999998	0.049487605999999996	0.055718463	united states	us & canada	19
134	RTJiZaFkiJg	Concerns about eruptions at Italy's Mt Etna	There are concerns about increased volcanic activity at Italy's Mt Etna. The volcano erupted again on Sunday, coating the countryside in ash and closing nearby Catania airport. Al Jazeera's Claudio Lavanga reports from Mt Etna.	0.0233488	2013-12-17T00:19:01.000Z	0.023348847000000002	0.015473586999999999	0.012321237	middle east	middle east	12
135	x4ys71O7DjI	Comedian elected Guatemala president	Guatemalan former comedian Jimmy Morales has claimed victory in presidential election, with 70 percent of the runoff vote, leaving his center-left rival and former first lady Sandra Torres a distant second. Al Jazeera's David Mercer reports from Guatemala City. Subscribe to our channel http://bit.ly/AJSubscribe Follow us on Twitter https://twitter.com/AJEnglish Find us on Facebook https://www.fac…	0.0235054	2015-10-26T15:28:11.000Z	0.023505434	0.18576689	0.051227983	politics	politics	13
136	HPb32SxIpy4	Kenya accuses students of torching schools to protest educational reform	At least 120 secondary schools have been burned down in Kenya since early June. The government is blaming students angry over its campaign to end cheating in schools. Al Jazeera’s Catherine Soi reports from Nairobi. - Subscribe to our channel: http://aje.io/AJSubscribe - Follow us on Twitter: https://twitter.com/AJEnglish - Find us on Facebook: https://www.facebook.com/aljazeera - Check our websi…	0.0235927	2016-08-04T14:39:28.000Z	0.023592697000000003	0.26305009999999995	0.10395846	africa	africa	1
137	L7jFxvtoOfo	Counting the Cost - Feature - Going supersonic	New technology could transport passengers from London to New York in less than two hours. Technology reporter Tarek Bazley reports from Swiss Space System's headquarters in Payerne, Switzerland. - Subscribe to our channel http://bit.ly/AJSubscribe - Follow us on Twitter https://twitter.com/AJEnglish - Find us on Facebook https://www.facebook.com/aljazeera - Check out our website:http://www.aljaze…	0.0235957	2014-09-28T18:39:13.000Z	0.02359574	0.036810393999999996	0.009619166	science & technology	science & technology	17
138	Jxna0I0Yo2A	Al Jazeera Correspondent - Trail of Murder: Indonesia's Bloody Retreat promo	Subscribe to our channel http://bit.ly/AJSubscribe Al Jazeera Correspondents returns for a third series of close-up and personal films from the heart of stories that have affected and shaped their lives.	0.0236249	2013-10-30T18:14:01.000Z	0.023624898999999998	0.5627209	0.017731171	media	media	11
139	T4OVwUPCQUc	Head to Head - Jimmy Wales (Web Extra)	Subscribe to our channel http://bit.ly/AJSubscribe Mehdi Hasan challenges Jimmy Wales, the founder of Wikipedia and one of the world's most renowned internet gurus, on whether Wikipedia is degrading our knowledge, and whether liberty, privacy and security can coexist in the information age. Tune in to Al Jazeera for the full interview on April 4 at 20:00 GMT l http://aje.me/1gKROwB	0.0236249	2014-02-10T11:00:32.000Z	0.023624921	0.15883158	0.061363753	africa	africa	1
140	prsuC_cMisY	South America's First Sustainable Public School	Uruguay has built South America's first sustainable public school, complete with a natural air conditioner. Teachers tie courses to topics like nature and responsible use of the building.	0.0236388	2016-12-22T15:13:29.000Z	0.023638835		0.0071141495999999995	latin america	latin america	10
141	TgKv5NqoTdU	High hopes for southern Filipinos under Rodrigo Duterte	Al Jazeera's Jamela Alindogan is in Rodrigo Duterte's hometown in the Island of Mindanao. She reports on the hopes people have, after years of neglect by previous governments. - Subscribe to our channel: http://aje.io/AJSubscribe - Follow us on Twitter: https://twitter.com/AJEnglish - Find us on Facebook: https://www.facebook.com/aljazeera - Check our website: http://www.aljazeera.com/	0.0236901	2016-06-29T14:48:45.000Z	0.02369014	0.11725702	0.021027397000000003	europe	europe	6
142	iRPg_jpOyp4	Inside Story - Egypt: Taking stock of the revolution	Three years after the fall of Hosni Mubarak we analyse what Egyptians have achieved and where the country is headed. Adrian Finighan talks to Naomi Ramirez Diaz, a researcher at Autonoma University in Madrid, who specialises in political Islam; Zakariyya Abdel-Hady, an associate professor of Islamic Thought and Culture at Qatar University, who studies Egyptian politics; Omar Ashour, a senior lect…	0.0237124	2014-01-28T05:48:18.000Z	0.017014265	0.045193545999999994	0.0042708996	egypt	middle east	12
143	h9fN7frajeA	On Location: Farmyard protest draws thousands to central Brussels	Thousands of farmers have been protesting in Brussels to demand European Union action to counter the slumping prices they get for milk and pork. They say that milk costs more to produce than it is currently sold for. In response, the European Commission have offered measures worth $557m to help farmers facing economic problems. Go in depth: http://aje.io/qbcl Subscribe to our channel http://bit.l…	0.0238022	2015-09-07T20:03:43.000Z	0.016757663	0.006469939	0.058806658	business & economy	business & economy	4
144	t4iP0AZIIoY	Millions take shelter as cyclone hits India	Millions of people have been taking shelter from one of the most powerful cyclones to hit India in more than a decade. Homes have been damaged and crops have been destroyed in Odisha and Andhra Pradesh. But so far, the number of people reported killed by Cyclone Pie-Leen is remarkably low. Al Jazeera's Azhar Suki reports.	0.0238034	2013-10-13T12:07:26.000Z	0.023803381000000002	0.41860977	0.1871253	asia	asia	3
145	8jaH-qEOPCY	Aruba to become energy independent by 2020	While Aruba is best known for its beaches and sunny weather, it is now being hailed as a leader in green technology. It's on track to becoming energy independent by 2020. Al Jazeera's Andy Gallacher reports. Subscribe to our channel http://bit.ly/AJSubscribe Follow us on Twitter https://twitter.com/AJEnglish Find us on Facebook https://www.facebook.com/aljazeera Check our website http://www.aljaz…	0.0240186	2017-05-10T18:45:20.000Z	0.026259003	0.009932954	0.03622502	science & technology	science & technology	17
146	tePTf34bAZM	Al Jazeera’s special week of programmes dedicated to women’s issues | reVIEW	Subscribe to our channel http://bit.ly/AJSubscribe In honour of International Women’s Day, Al Jazeera is airing a series of programmes this week dedicated to women’s rights issues. ‘Hip-Hop Hijabis’ [http://aje.io/e4qg] follows Britain’s first female Muslim hip-hop duo on tour; ‘Death in Plain Sight’ [http://aje.me/1fGEIvJ] investigates the US’ epidemic of domestic violence homicide and asks if w…	0.0241764	2015-03-09T10:58:15.000Z	0.02417641	0.04041267	0.053319298	media	media	11
147	3oQnpkaqXIY	The Cafe - Promo: A new season of the Cafe	Ever eavesdropped on a fascinating conversation and wished you could take part? Ever wanted the opportunity to confront the mighty and hold them to account? The Cafe is your chance - a truly democratic forum for ideas, hosted by Mehdi Hasan. The programme discusses global themes with people who are experiencing these events first-hand - from the global economic crisis to resource wars and ethnic …	0.0242113	2012-07-09T13:59:54.000Z	0.02559735	0.017689139	0.09784013	pakistan	asia	3
148	bnqB_jCVEKk	Fault Lines - Obama: Year One	Fault Lines' Avi Lewis takes a look back at the promises that swept the US president to power - and Americans' perceptions of Obama the man, the policy-maker, and the commander-in-chief at the end of his first 12 months in office. From the Wall Street bailout to his escalation of the Afghan war to his handling of health care, he has been criticised from the left and the right. As the desires the …	0.0242583	2013-02-22T11:05:34.000Z	0.024258257999999998	0.341329	0.10798332	donald trump	us & canada	19
149	GYh9d4xBDWo	Inside Story - Turkey: Political power struggle?	We ask if an investigation into corruption is a mere battle of wills or if it can have an effect on Turkish politics.	0.0242743	2013-12-21T13:46:11.000Z	0.024274318	0.073781736	0.08066536	middle east	middle east	12
150	ExOGAk4smNk	Counting the Cost - 08Nov2013 promo	Subscribe to our channel http://bit.ly/AJSubscribe Counting the Cost - 08Nov2013 promoAt Al Jazeera English, we focus on people and events that affect people's lives. We bring topics to light that often go under-reported, listening to all sides of the story and giving a 'voice to the voiceless.' Reaching more than 270 million households in over 140 countries across the globe, our viewers trust Al…	0.0242964	2013-11-08T17:30:08.000Z	0.02429636	0.06662201	0.0095172655	media	media	11
151	NZmtTjZhzEs	Artists create 'Outside art' in Hong Kong	April is 'Art Month' in Hong Kong. Armed with cans of spray paint, local and international artists have created an outdoor exhibition along the sides of buildings in a struggling, industrial area. Al Jazeera’s Divya Gopalan reports from Hong Kong. - Subscribe to our channel: http://aje.io/AJSubscribe - Follow us on Twitter: https://twitter.com/AJEnglish - Find us on Facebook: https://www.facebook…	0.0243116	2017-04-21T14:18:07.000Z	0.024311567000000003	0.09923621	0.009183416	africa	africa	1
152	4RTkzQZdrYs	New mothers encouraged to re-join the workforce in Japan	The Japanese government wants more women to return to the workforce after they have children. Dubbed 'women-omics' it's aimed at reviving the economy, but the policy conflicts with conservative Japanese culture, which encourages women to stay at home. Rob McBride reports from Tokyo.	0.0243121	2015-06-28T20:56:32.000Z	0.024312062000000002	0.028826846	0.075176455	arts & culture	arts & culture	2
153	Q-6nyOjJp5o	What to look for at China's National People's Congress	Writer and historian Jeremiah Jenne tells Al Jazeera about some of the important economic and social issues that are likely to be discussed at China's 2016 National People's Congress. - Subscribe to our channel: http://bit.ly/AJSubscribe - Follow us on Twitter: https://twitter.com/AJEnglish - Find us on Facebook: https://www.facebook.com/aljazeera - Check our website: http://www.aljazeera.com/	0.0244621	2016-03-05T09:14:45.000Z	0.024462092999999997	0.012806165	0.0040654307	china	asia	3
154	bBiHWwZ5iT4	No decision on Qatar 2022 World Cup yet: FIFA	FIFA played down claims from its secretary-general that the 2022 World Cup to take place in Qatar will not be held in the summer. The announcement by Jerome Valcke in an interview to France Inter Radio on Wednesday caught some of his own colleagues by surprise. The tournament's scheduling has been debated since the controversial decision in 2010 to award the World Cup to the Gulf Arab state. Temp…	0.0246895	2014-01-08T23:50:39.000Z	0.048097238	0.04085666	0.008141345999999999	gcc	middle east	12
155	nEg7176EE0Q	S Africa's Democratic Alliance launches its manifesto	South Africa's main opposition party the Democratic Alliance has launched its manifesto for the upcoming crucial local elections. It is hoping to capitalise on a series of scandals that have put the governing African National Congress and President Jacob Zuma under huge pressure. Al Jazeera's Tania Page reports from Johannesburg. - Subscribe to our channel http://bit.ly/AJSubscribe - Follow us on…	0.0247374	2016-04-24T16:47:51.000Z	0.024737397	0.025280587	0.039786592	africa	africa	1
156	tp5o956z-80	Afro-Bolivians recognized as a distinct ethnic group	In Bolivia descendants of African slaves are staking a claim in a society that until recently didn't even know they existed. Afro Bolivians are being given a voice following a campaign by President Evo Morales to overcome racism. Al Jazeera’s Daniel Schweimler has more. - Subscribe to our channel: http://bit.ly/AJSubscribe - Follow us on Twitter: https://twitter.com/AJEnglish - Find us on Faceboo…	0.0248346	2017-12-19T07:52:35.000Z	0.051092103	0.043805074000000006	0.22224446	africa	africa	1
157	S_r_VH8OSH8	South2North - A world of waste	Subscribe to our channel http://bit.ly/AJSubscribe Do you know where all your waste goes after it has been thrown in the bin or flushed down the toilet? This week on South2North, Redi looks at the world of waste; how it is managed, by who and, perhaps most importantly, how much money it is generating.At Al Jazeera English, we focus on people and events that affect people's lives. We bring topics …	0.0250441	2013-09-07T08:10:02.000Z	0.010134655	0.55690026	0.08287699999999999	media	media	11
158	K3KB6j5Smr8	First Person - Indonesia's child jockeys	In Indonesia's remote southern island of Sumbawa, children as young as five compete as professional jockeys in traditional horse races. The young racers often stare death in the face while chasing around a dusty track in front of cheering spectators. Predominantly from poor families, the jockey's race when when they're not studying at school and earn enough to support their entire families. Sahru…	0.0250888	2014-09-30T07:35:43.000Z	0.017512428	0.38894209999999996	0.116344996	asia pacific	asia	3
159	efV6YfTKnUU	Archive of world's rarest sounds faces danger of silence	The British Library has a treasure trove of sound recordings including the voices of famous writers, lost accents and the songs of extinct bird species. But it all needs to be preserved digitally. Al Jazeera's Neave Barker reports from London. Subscribe to our channel http://bit.ly/AJSubscribeFollow us on Twitter https://twitter.com/AJEnglishFind us on Facebook https://www.facebook.com/aljazeeraC…	0.0251167	2017-03-03T22:00:28.000Z	0.025116745	0.19600253	0.026734155	europe	europe	6
160	0kexfyHbRDI	Ghana facing healthcare funding crisis	Hospitals, clinics and pharmacies in Ghana are fast running out of funds to continue operating. Many have not received payments owed to them by the government under a national health insurance scheme, and if they are forced to close or scale down operations it could affect millions who rely on public healthcare services. Al Jazeera's Ama Boateng reports from Accra. Subscribe to our channel http:/…	0.0251795	2014-08-21T03:36:30.000Z	0.025179481	0.0826442	0.028096158	health	health	7
161	I_qH3-VViDU	Featured Documentary - Indian Hospital Ep 3 promo	Subscribe to our channel http://bit.ly/AJSubscribe Indian Hospital Ep 3	0.0252125	2017-04-04T01:28:45.000Z	0.016255992	0.008346538	0.0141878985	asia	asia	3
162	V93jNkIwjNs	Carly Nyst on the 'James Bond complex' - The Listening Post (Web Extra)	Subscribe to our channel http://bit.ly/AJSubscribe Subscribe to our channel http://bit.ly/AJSubscribe Carly Nyst, Legal Director of Privacy International, on the 'James Bond complex' and how it skews the reporting and perception of government surveillance. Watch the full show online | http://aje.io/4zju Keep up to date with The Listening Post: Follow us on Twitter: https://twitter.com/AJListening…	0.0252827	2015-03-30T23:51:02.000Z	0.025282742	0.045867667	0.013888963	media	media	11
163	pTUqd1SSwOU	Detroit runs dry – Highlight	Subscribe to our channel http://bit.ly/AJSubscribe A resident of Detroit speaks with Femi about what it feels like to have their water shut off. For more, watch the full episode: http://bit.ly/ULhb9L At Al Jazeera English, we focus on people and events that affect people's lives. We bring topics to light that often go under-reported, listening to all sides of the story and giving a 'voice to the …	0.0254504	2014-07-31T00:18:24.000Z	0.02545041	0.12153569	0.043423943	europe	europe	6
164	9F0E26p0qTo	Inside Story - CAR: At a crossroads of conflict	Can intervention from the European Union bolster African efforts to bring an end to sectarian violence. Adrian Finigan talks to Sylvain Touati, an Africa analyst at FIKRA - a Doha-based political think tank; Louis Keumayou, the president of the Pan-African Press Association; and Vincent Darracq, a global security analyst specialising on Africa.	0.0255076	2014-01-23T17:57:31.000Z	0.02908932	0.034231395	0.11282903	africa	africa	1
165	WqJvxnk8Y98	Political unrest paralyses Burundi's economy	Months of violence in Burundi have disrupted daily life and paralysed the economy. Mohammed Adow reports from the capital Bujumbura. - Subscribe to our channel: http://bit.ly/AJSubscribe - Follow us on Twitter: https://twitter.com/AJEnglish - Find us on Facebook: https://www.facebook.com/aljazeera - Check out our website: http://www.aljazeera.com/	0.0255526	2015-12-20T17:10:47.000Z	0.025552595	0.19284475	0.11129457	africa	africa	1
166	XH-lTw2wBHI	Inside Story Generic - 21April2014 promo	PLEASE EDIT	0.0255891	2015-07-23T05:59:28.000Z	0.02558914	0.1066579	0.031166429	middle east	middle east	12
167	pRDVizwAQFM	Counting the Cost - 01Nov2013 promo	Subscribe to our channel http://bit.ly/AJSubscribe PLEASE EDIT	0.0255891	2013-11-01T21:43:42.000Z	0.02558914	0.06662201	0.011502505	media	media	11
168	BuLNe4g9D-Q	Drop in crime level benefits Brazil's favelas	As Brazil gets ready to host the Olympics and the football World Cup, the government has been cracking down on crime in Rio de Janeiro. In shantytowns also known as favelas, where police have increased their presence, entrepreneurs say they are benefiting from the drop in gang-related crimes. Al Jazeera's Gabriel Elizondo reports from Rio.	0.0256685	2014-01-01T22:21:11.000Z	0.016762648	0.366752	0.08541845	politics	politics	13
169	GBjr-ZfBcGg	Myanmar set for peace talks with rebel groups	Myanmar set for peace talks with rebel groups Peace talks aimed at ending Myanmar's numerous long-running ethnic conflicts are due to get under way in the country's capital on Wednesday. The leaders of a number of armed groups have arrived in Naypyidaw. But there are major obstacles to overcome for all sides in order for the new round of talks to make a real impact. Al Jazeera's Florence Looi rep…	0.0258947	2017-05-24T05:56:11.000Z	0.025894746	0.115156986	0.017258693999999998	myanmar	asia	3
170	NXAOei8PcYk	Cambodia opposition leader returns from exile	Subscribe to our channel http://bit.ly/AJSubscribe Subscribe to our channel http://bit.ly/AJSubscribe Thousands of cheering supporters greeted Cambodian opposition leader Sam Rainsy as he returned from self-imposed exile to spearhead his party's election campaign against Prime Minister Hun Sen. Al Jazeera's Caroline Malone reports. At Al Jazeera English, we focus on people and events that affect …	0.0259509	2013-07-22T06:04:09.000Z	0.03481772	0.12571791	0.018761525	media	media	11
171	_e74QOSefzE	May Highlights - Version 2 promo	- Subscribe to our channel: http://aje.io/AJSubscribe - Follow us on Twitter: https://twitter.com/AJEnglish - Find us on Facebook: https://www.facebook.com/aljazeera - Check our website: http://www.aljazeera.com/	0.0260772	2017-05-01T14:26:23.000Z	0.026077244	0.040402446	0.0071871737	africa	africa	1
172	anKNibU90IA	Citizen lawyer - Witness	Subscribe to our channel http://bit.ly/AJSubscribe The number of lawyers in China has risen from a few thousand to 230,000 in 30 years. But in many places, licensed lawyers remain scarce. Here, unofficial 'citizen representatives' with little or no legal training often fill the gap. Witness is a weekly show that brings world issues into focus with courageous and inspiring human stories. Connect w…	0.0260825	2014-07-08T13:13:29.000Z	0.02608257	0.02021267	0.012362525	africa	africa	1
173	oMFk-jNXZEQ	Former Uganda child soldiers return home	When Dennis Ocan was 10 he was kidnapped and forced to serve as a child soldier for Lord's Resistance Army until he escaped 13 years later. Now after weeks at a rehabilitation centre for former fighters, he has finally returned home. While hundreds of child soldiers have been through the centre thousands remain missing. Al Jazeera's Malcolm Webb reports from Kitgum in northern Uganda.	0.0260892	2014-05-05T09:33:02.000Z	0.024866195	0.106866315	0.07431	war & conflict	war & conflict	20
174	BUz0llNbFWc	Innovate Africa - Transforming food	Real-life Farmville and a pregnancy app for cows - mobile technology is changing the way farmers do business in Africa.	0.0264638	2017-04-15T15:13:35.000Z	0.02646375	0.026936624	0.2584756	africa	africa	1
175	A0zKafHzR0Y	Maldives former president accuses security forces of mistreating him	The opposition party of Mohamed Nasheed says the former president of the Maldives’ arrest and prosecution under “terror” laws are politically motivated. Nasheed says he has been mistreated by security forces and denied access to his lawyer. Al Jazeera's Osama Bin Javaid reports. More on our website: http://aljazeera.com Follow us on Twitter: http://twitter.com/AJEngligh Subscribe to our channel: …	0.026584	2015-02-24T21:29:15.000Z	0.026583966	0.26310933	0.083603576	africa	africa	1
176	hduj7KC3eJs	Ecuador votes with economy fears in play	Nearly 13 million voters in Ecuador will head to the polls on Sunday to elect a new president. Their current leader, Rafael Correa, has been in office for ten years, overseeing an oil-backed boom. Now, though, the economic outlook is much less rosy. Al Jazeera’s Daniel Schweimler reports from Quito. - Subscribe to our channel: http://aje.io/AJSubscribe - Follow us on Twitter: https://twitter.com/…	0.02659	2017-10-19T01:51:55.000Z	0.026589975	0.06389432	0.012451026	business & economy	business & economy	4
177	yRKk4buoCtA	earthrise - Gothenburg's Green Port; Yangtze Porpoise & Britain's Leftover Cafe	A lack of control on ship exhausts and poor quality marine fuel means ocean going ships are polluting our air. earthrise heads to Sweden to see how Gothenburg's port is at the forefront of reducing shipping emissions including by getting ships to tap into renewable energy at the docks. In China, we meet professor Wang Ding who is working hard to save the world's only freshwater porpoise threatene…	0.0266151	2015-04-28T21:46:49.000Z	0.026615104	0.05998131	0.11769659	united kingdom	europe	6
178	Z2l9nlYn6nA	Middle East animation takes centre stage at Cannes	For the second year running, there’s been an animation day at the Cannes Film Festival and it hasn't all been about the big studios. Less famous films from places such as the United Arab Emirates, Iran, and Iceland have also taken the spotlight. Al Jazeera's Jacky Rowland reports from Cannes. - Subscribe to our channel: http://bit.ly/AJSubscribe - Follow us on Twitter: https://twitter.com/AJEngli…	0.0268376	2016-05-19T15:55:51.000Z	0.026837645	0.110746995	0.039003592000000004	arts & culture	arts & culture	2
179	L-lB5Kn2KTg	Chapecoense play first Libertadores match after plane crash	Brazilian football club Chapecoense played their first home Copa Libertadores match on Thursday. The team lost most of its players in an airplane crash last year. Al Jazeera’s Peter Stemmet reports. - Subscribe to our channel: http://aje.io/AJSubscribe - Follow us on Twitter: https://twitter.com/AJEnglish - Find us on Facebook: https://www.facebook.com/aljazeera - Check our website: http://www.al…	0.0268392	2017-03-17T21:01:55.000Z	0.026839172	0.30732754	0.031314153	africa	africa	1
180	l3YM_YDF2KA	Oman's rise in the sailing world	This week Oman is hosting the RS:X World Windsurfing Championships for the first time. It hosted the Laser World Championships two years ago and the capital Muscat is also one of eight stops on the prestigious round-the-world Extreme Sailing Series. As well as providing the venue, Oman’s sailors are proving to be world class too. Joanna Gasiorowska reports.	0.0269365	2015-10-20T09:49:22.000Z	0.026936494	0.07304968	0.01965592	united states	us & canada	19
181	bKo9GC0XtP8	101 East - Vietnam’s Tech Rush promo	- Subscribe to our channel: http://aje.io/AJSubscribe - Follow us on Twitter: https://twitter.com/AJEnglish - Find us on Facebook: https://www.facebook.com/aljazeera - Check our website: http://www.aljazeera.com/	0.0270683	2017-01-16T17:02:48.000Z	0.027068292999999997		0.0071871737	media	media	11
182	GtHaH3uA7uY	New tools in Kenya's fight against malaria	Although it's easily preventable, malaria is still endemic in many parts of the world, particularly in Africa. Traditional measures like insecticides and mosquito nets have reduced infection rates in many places, but now scientists are turning to new technology to fight the disease. Al Jazeera's Catherine Soi reports from Rusinga Island, one of Kenya's most affected regions.	0.0270848	2015-06-28T18:39:21.000Z	0.027084837	0.10684666	0.03333727	africa	africa	1
183	xO7p1n12kDA	Al Jazeer World - The Wooden Rifle promo	Subscribe to our channel http://bit.ly/AJSubscribe The compelling story of five people in Beirut who were too young to fight in the Lebanese Civil War but whose lives have been deeply affected by its legacy.	0.027236	2015-02-08T11:56:14.000Z	0.026110835	0.053711365999999997	0.032462242999999995	lebanon	middle east	12
184	peibfpUXUCo	Hong Kong craftsmen struggling to keep traditional art alive	One of the Hong Kong’s last remaining craftsmen in ornamental art is trying to keep the tradition alive. Known as flower plaques, the colourful creations are often displayed during festivals and weddings. But the industry which has thrived for decades is struggling to compete. Al Jazeera’s Sarah Clarke reports from Hong Kong. - Subscribe to our channel: http://aje.io/AJSubscribe - Follow us on Tw…	0.0272401	2016-10-23T03:23:11.000Z	0.027240057	0.07342548	0.009996445999999999	arts & culture	arts & culture	2
185	k7tSgZjszjI	Al Jazeera Digital Magazine - July 2013 Issue promo	Subscribe to our channel http://bit.ly/AJSubscribe Turkey: A country in transition? The July issue of the Al Jazeera Magazine explores the complexities of a nation straddling both east and west.	0.027254	2013-07-16T03:38:28.000Z	0.04460236	0.059413099999999996	0.008552164000000001	middle east	middle east	12
186	IToTH5nqC54	Nepal children at risk after earthquake	More than 1.7 million children have been affected by Nepal’s earthquake. Many children have not only lost their homes, but also their parents. Without systems in place yet, child welfare is in crisis. Al Jazeera's Subina Shrestha reports from Kathmandu. Subscribe to our channel http://bit.ly/AJSubscribe Follow us on Twitter https://twitter.com/AJEnglish Find us on Facebook https://www.facebook.co…	0.0272767	2015-05-24T10:08:46.000Z	0.02727666	0.16953987	0.034660652	africa	africa	1
187	ZDjwOia7y8E	Sundance film festival: documentaries undergoing renaissance	The Sundance Film Festival has started in the US state of Utah - where much of the buzz is around documentaries. Thanks to increased access through TV and internet platforms - they're able to reach a wider audience than ever. Al Jazeera's Rob Reynolds reports from Park City in Utah. - Subscribe to our channel: http://bit.ly/AJSubscribe - Follow us on Twitter: https://twitter.com/AJEnglish - Find …	0.0272942	2016-01-24T00:15:40.000Z	0.02729417	0.0028185006	0.004199975	arts & culture	arts & culture	2
188	DC_0bWoUjCc	test hd	test	0.0273646	2015-02-04T14:57:44.000Z	0.027364593	0.008102794	0.007148649	asia pacific	asia	3
189	Y4btEgU0ad4	Inside Story - Making choices after Chavez	Is Venezuela's socialist revolution under siege? Shihab Rattansi speaks to Gregory Wilpert, the founder of Venezuelanalysis.com and author of 'Changing Venezuela by Taking Power', Girish Gupta, a journalist covering events in Venezuela, Daniel Hellinger, a professor at Webster University, and author of 'Venezuelan Politics in the Chavez Era: Class, Polarization and Conflict'	0.0274978	2014-02-18T19:59:46.000Z	0.027497754	0.04320159	0.020378204	europe	europe	6
190	gncR-735qzQ	New York’s secret garden reopens after eight-decades	A small corner of New York City's Central Park is opening to the public after being closed for more than 80 years. During this time, the Hallett Nature Sanctuary was badly neglected. The man behind the restoration project Doug Blonsky, president and CEO of the Central Park Conservancy, is trying to return the garden to its former glory. - Subscribe to our channel: http://bit.ly/AJSubscribe - Foll…	0.0275031	2016-05-22T11:06:10.000Z	0.027503082999999998	0.12537767	0.014253392	united states	us & canada	19
191	fY39-EsmwT8	The Listening Post - promo	- Subscribe to our channel: http://aje.io/AJSubscribe - Follow us on Twitter: https://twitter.com/AJEnglish - Find us on Facebook: https://www.facebook.com/aljazeera - Check our website: http://www.aljazeera.com/ A weekly programme that examines and dissects the world's media.	0.0275986	2016-09-07T15:50:19.000Z	0.029608121	0.03741274	0.029352347999999997	media	media	11
192	Nbu-uW-h0LI	Ebola outbreak sparks high maternity mortality rate in Sierra Leone	Sierra Leone is slowly rebuilding its healthcare system after the worst Ebola outbreak in history. But the deadly disease has left the country struggling with one of the highest maternal mortality rates in the world, and local healthcare staff and facilities are often ill-equipped and unprepared. Al Jazeera’s Nina deVries reports from the capital, Freetown. - Subscribe to our channel: http://bit.…	0.0276014	2016-06-23T03:22:12.000Z	0.027601382	0.040934384	0.053478587	health	health	7
193	LYtIyfg59a8	Letter from my Child: The Promo	Subscribe to our channel http://bit.ly/AJSubscribe Subscribe to our channel http://bit.ly/AJSubscribe Letter From My Child aims to give a human face to front-page news. Personal stories transform, major news events into human tragedies. Children are the future, although their opinion is hardly ever heard. Al Jazeera and IKON TV gives these children a voice. At Al Jazeera English, we focus on peop…	0.027645	2013-04-15T15:29:19.000Z	0.027645002999999998	0.07469682400000001	0.017240085	media	media	11
194	0ybDGgwQyek	Conflict main theme at Venice Film Festival	The Venice Film Festival may be full of glamour - but this year, it's also full of war. Conflict is the main theme, with five war films competing for the main prize and lots more that are not in competition. Al Jazeera's Phil Lavelle reports from Venice. Subscribe to our channel http://bit.ly/AJSubscribe Follow us on Twitter https://twitter.com/AJEnglish Find us on Facebook https://www.facebook.c…	0.0278188	2014-08-31T11:50:38.000Z	0.027818818	0.01163622	0.019182002	arts & culture	arts & culture	2
195	gs93FLBm6qg	Swiss rail tunnel breaks records: Explainer	For centuries the Swiss Alps have been a major transport barrier for anyone wanting to travel or move freight from Italy into the north of Switzerland and on to northern and western Europe. But now after decades of planning and construction the Gothard base tunnel is finished; twin rail tunnels running 57.09 km beneath the Alps. It is the longest rail tunnel in the world, beating both Japan's Sei…	0.0278752	2016-06-01T10:58:47.000Z	0.027875196	0.08029669	0.016359124	africa	africa	1
196	Se5KKIRsGH0	Ugandan families remember lost children	More than 20,000 Ugandan children were abducted by the rebel Lord's Resistance Army, and forced into becoming fighters or sex slaves. Today, years after the LRA was chased out of Uganda, many families are trying to come to terms with the fact that their loved ones may never return. Al Jazeera's Malcolm Webb reports from Lamwo district in Northern Uganda.	0.0278884	2013-12-30T05:24:50.000Z	0.027888391000000002	0.39456132	0.18143183	middle east	middle east	12
197	AwaRt-eqq1I	Scientists push for cost-effective medical care	The World Innovation Summit for Health is taking place in Qatar. A UK-based company says its product, which standardises the connection hardware, will reduce the cost	0.0279945	2016-11-30T07:24:54.000Z	0.02799449		0.027030252	europe	europe	6
198	k4bD_Lt00g8	Fault Lines - The Anacortes Disaster promo	In an exclusive investigation with The Center for Public Integrity, Fault Lines reports on the aftermath of the Anacortes oil refinery disaster & ongoing efforts to hold the company accountable.	0.028022	2016-12-08T00:18:47.000Z	0.028021984		0.04729636	environment	environment & weather	5
199	Us-oot00IJ4	US light show kicks off in Baltimore	One of America's biggest outdoor light shows is being held in Baltimore. Hundreds of thousands of visitors are attending displays highlighting everything from climate change to the crisis in Syria. Al Jazeera’s Tom Ackerman reports from Baltimore. - Subscribe to our channel: http://aje.io/AJSubscribe - Follow us on Twitter: https://twitter.com/AJEnglish - Find us on Facebook: https://www.facebook…	0.0280874	2017-04-30T21:26:43.000Z	0.028087419	0.2570636	0.0143114375	media	media	11
200	uIcGviIOxr8	Empire - Hollywood: The Chronicle of History promo	Subscribe to our channel http://bit.ly/AJSubscribe An examination of Hollywood¹s global influence and appeal which allows it to mould perceptions about cultures, peoples and history.	0.0281463	2014-02-24T10:27:05.000Z	0.028146273	0.024914077000000003	0.005358004499999999	united states	us & canada	19
201	IXgXhstrQCc	earthrise - Algae-Fuelled Energy & Sustainable Fishing in Belize - promo	Subscribe to our channel http://bit.ly/AJSubscribe Turning algae into oil; banning destructive fishing in Belize; and the first solar-powered vessel to circle the globe.	0.0283469	2014-07-15T14:33:18.000Z	0.02834686	0.037392437	0.10757798	media	media	11
202	dHTFZLxGEZI	Al Jazeera joins Ebola burial team in Liberia	The World Health Organisation says there are not enough resoures to safely dispose of Ebola victims' bodies. Al Jazeera joined a burial team in Liberia to witness the measures taken. Bhanu Bhatnagar reports. Subscribe to our channel http://bit.ly/AJSubscribe Follow us on Twitter https://twitter.com/AJEnglish Find us on Facebook https://www.facebook.com/aljazeera Check our website: http://www.alja…	0.0283554	2014-12-07T10:34:06.000Z	0.028355425	0.14066325	0.062881164	africa	africa	1
203	dJ00ymG0Hxw	Thousands in Pretoria line up to wish Mandela farewell	Thousands of people are lining up to say farewell to South Africa's first black president and anti-apartheid hero Nelson Mandela. His body is lying in state at the Union Buildings in the capital Pretoria until Friday. Al Jazeera's Haru Mutasa reports.	0.0284042	2013-12-12T11:48:45.000Z	0.028404236	0.020651068999999998	0.3635983	africa	africa	1
204	iEYATlzDlYU	Donetsk People's Republic seeking gas deal with Russia	The pro-Russia seperatists want to strike a deal to get gas from Moscow. The economy in Donetsk region is virtually suspended this power station is only operating one turbine at just 15% of its ordinary capacity. There's a fuel shortage and it runs mainly on coal but it can't provide the power to the coal mines - in order to produce more fuel. Al Jazeera's Robin Forestier-Walker reports from Done…	0.0284848	2014-09-22T20:18:42.000Z	0.02848478	0.30150872	0.06484575599999999	business & economy	business & economy	4
205	9lgTrQO1OVk	Talk to Al Jazeera - Frank Chikane: 'One day we will lose him'	Subscribe to our channel http://bit.ly/AJSubscribe This week, Talk to Al Jazeera sits down with Frank Chikane to discuss his concerns about South Africa after Mandela, and the radical changes he thinks the country needs to implement before a revolt starts. At Al Jazeera English, we focus on people and events that affect people's lives. We bring topics to light that often go under-reported, listen…	0.0285203	2017-12-12T12:37:28.000Z	0.028520266000000002	0.11997382	0.0114822965	media	media	11
206	fvXYrkIEX_c	India Art Fair taps into global trends	Subscribe to our channel http://bit.ly/AJSubscribe India is hosting its annual Art Fair, which showcases work from around the world. But India itself is fast becoming a creative powerhouse. Its art industry made close to $3bn last year. Al Jazeer's Sohail Rahman has the story from New Delhi. At Al Jazeera English, we focus on people and events that affect people's lives. We bring topics to light …	0.0285546	2013-02-03T03:35:17.000Z	0.028554602000000002	0.022076922000000002	0.01987608	arts & culture	arts & culture	2
207	OFi5AQnOvcI	earthrise - Round the Clock Renewables	Subscribe to our channel http://bit.ly/AJSubscribe Subscribe to our channel http://bit.ly/AJSubscribe Liquid air energy storage is helping to solve one of renewable energy's greatest challenges. At Al Jazeera English, we focus on people and events that affect people's lives. We bring topics to light that often go under-reported, listening to all sides of the story and giving a 'voice to the voice…	0.0285616	2017-12-18T18:05:24.000Z	0.031578284	0.11411379	0.011039953	media	media	11
208	ibYdky9dyZo	Al Jazeera Correspondent - Motherhood on Ice	Subscribe to our channel http://bit.ly/AJSubscribe Subscribe to our channel http://bit.ly/AJSubscribe Reaching more than 270 million households in over 140 countries across the globe, our viewers trust Al Jazeera English to keep them informed, inspired, and entertained. Our impartial, fact-based reporting wins worldwide praise and respect. It is our unique brand of journalism that the world has c…	0.0285763	2014-12-07T03:47:07.000Z	0.023788277000000004	0.09338143	0.010952337	media	media	11
209	-hxJ6p45iXI	Palestine Remix - Israeli Brutality Caught on Tape	PALESTINE REMIX: Activists Salam Kana'an and Irish Tommy Donnellan talk about capturing Israeli violence against Palestinians on film. Use this clip from 'Against the Wall ' film and mix it with other clips to make your own story on Palestine on our website: http://www.palestineremix.com Like us on Facebook: English page https://www.facebook.com/PalestineRemix Arabic page http://www.facebook.com/…	0.0286077	2015-03-23T04:02:16.000Z	0.028607719	0.50471675	0.072880805	palestine	israel-palestine	9
210	QdcZmN2OwtM	The Stream - #StreamAt5: A look back with some former hosts	Follow The Stream and join Al Jazeera’s social media community: This episode’s story: http://stream.aljazeera.com/story/201604281352-0025200 FACEBOOK: http://www.facebook.com/AJStream TWITTER: https://twitter.com/AJStream GOOGLE+: http://google.com/+TheStream **************************************************** On The Stream: Former hosts join us to mark five years in The Stream.	0.0288344	2016-05-10T19:35:39.000Z	0.009601071999999999	0.2457879	0.16474995	science & technology	science & technology	17
211	W7HV2VTcgug	Ebola survivors continue to face poor health	Sierra Leone may be declared Ebola free in less than a month. Almost 4,000 people have died from the virus since the outbreak began last year. For those who survived, the battle is not over yet. Al Jazeera's Nina Devries reports from the capital Freetown.	0.0288917	2015-10-31T22:03:13.000Z	0.028891653	0.30795136	0.046441775	asia	asia	3
212	T6yaBTNfj_I	Mali: UN peacekeeping mandate to be renewed in June	The mandate of a UN peacekeeping operation in northern Mali is to be renewed in June. Rebels and the Malian government are not complying with a peace accord signed two years ago. That's giving an opening to al-Qaeda fighters in the region with the UN troops being their targets. Al Jazeera’s Nicolas Haque reports from Gao in northern Mali. - Subscribe to our channel: http://aje.io/AJSubscribe - Fo…	0.0290604	2017-05-29T07:06:45.000Z	0.029060442000000002	0.028221175	0.06772143	africa	africa	1
213	X3uzDtVDG8I	Witness - Gangbe Afrobeats promo	​The colourful Gangbe Brass Band sets off from Benin to perform at the spiritual home of Afrobeat in Lagos and celebrate the Pan-African dream.​ - Subscribe to our channel: http://bit.ly/AJSubscribe - Follow us on Twitter: https://twitter.com/AJEnglish - Find us on Facebook: https://www.facebook.com/aljazeera - Check out our website: http://www.aljazeera.com/	0.0291349	2016-03-15T20:00:49.000Z	0.029134886000000002	0.29177314	0.056882855	africa	africa	1
214	AVpjMsZzuxg	Battle in Burundi - Highlights	Subscribe to our channel http://bit.ly/AJSubscribe One decade ago Burundi was a burgeoning democracy. Six months ago it was plunged into political crisis that continues until today. When President Pierre Nkurunziza announced his run for a controversial third term in office, violence erupted. Despite opposition claims of the vote being unconstitutional and in violation of the Arusha Agreement, Nku…	0.029139	2015-11-08T01:44:35.000Z	0.02913904	0.041605365	0.021158837000000003	media	media	11
215	srxg-0MDv4Q	The Stream - #StreamUpdate: A look at the latest news from the stories we're following in Syria	Follow The Stream and join Al Jazeera’s social media community: This episode’s story: http://stream.aljazeera.com/story/201607051638-0025242 FACEBOOK: http://www.facebook.com/AJStream TWITTER: https://twitter.com/AJStream GOOGLE+: http://google.com/+TheStream **************************************************** On The Stream: The holy month in Aleppo, profiting off the war and how Syrian refugees…	0.0291634	2016-07-10T16:23:15.000Z	0.029163359	0.12327483	0.11447446	syria's civil war	war & conflict	20
216	dUqYrFTj2uo	US: Albuquerque balloon fiesta kicks off	The largest balloon festival in the world is now under way in New Mexico. The annual Albuquerque International Balloon Fiesta attracts almost a million visitors. Aljazeera's Gabriel Elizondo reports from Albuquerque, New Mexico. - Subscribe to our channel: http://aje.io/AJSubscribe - Follow us on Twitter: https://twitter.com/AJEnglish - Find us on Facebook: https://www.facebook.com/aljazeera - Ch…	0.0291926	2017-10-20T16:49:34.000Z	0.00822209	0.1428369	0.011967988999999998	latin america	latin america	10
217	zZgBruGhlS4	Talk to Al Jazeera - Andrei Linde: The beginning of time	One of the men behind the 'Big Bang' theory discusses his vision of the universe and the role of science in society. So what does the universe really look like? What is our place in it? And why is Professor Linde worried about the future of science?	0.0294328	2017-12-10T18:40:29.000Z	0.041890092000000004	0.092927985	0.054405272000000005	middle east	middle east	12
218	skh7DND20c0	The Stream - #StreamAt5: Memorable guests	Follow The Stream and join Al Jazeera’s social media community: This episode’s story: http://stream.aljazeera.com/story/201605022314-0025202 FACEBOOK: http://www.facebook.com/AJStream TWITTER: https://twitter.com/AJStream GOOGLE+: http://google.com/+TheStream **************************************************** On The Stream: As we mark our 5 year anniversary, we’re bringing back some of our most…	0.0296274	2016-05-04T08:21:30.000Z	0.0296274	0.07832983	0.08907171	science & technology	science & technology	17
219	sFYTR9lNLlM	Aljazeera Welcomes Viewers in India - Promo 12 promo	Subscribe to our channel http://bit.ly/AJSubscribe PLEASE EDIT	0.0296313	2013-10-24T19:45:26.000Z	0.029631259	0.06680413	0.011502527	asia	asia	3
220	WPxCcHIBePQ	Sudan flood displaced wait for aid	In Sudan 150,000 people continue to wait for aid to arrive following devastating floods. With an estimated 26,000 homes damaged or destroyed, many people are now living in the open without shelter or fresh running water. Al Jazeera's Harriet Martin reports from Khartoum.	0.0297649	2013-08-18T10:27:13.000Z	0.029764941	0.14505483	0.053962573	africa	africa	1
221	dQHhXpwIzGs	France floods: 20,000 forced from their homes	The water level in the River Seine in Paris is beginning to come down after days of bad flooding meant tens of thousands of people had to leave their homes. Al Jazeera’s Mohamed Vall reports from Montesson. - Subscribe to our channel: http://bit.ly/AJSubscribe - Follow us on Twitter: https://twitter.com/AJEnglish - Find us on Facebook: https://www.facebook.com/aljazeera - Check our website: http:…	0.0298817	2016-06-05T21:09:21.000Z	0.009078045	0.23754409	0.049993243	europe	europe	6
222	Wd094hPkh4o	Thousands of endangered plants are illegally traded each year	The issue of endangered plants is one that's often overlooked. But it's high on the agenda at this week's Convention on International Trade in Endangered Species currently under way in South Africa. In the US, endangered plants being brought in illegally are confiscated and given specialist care. Al Jazeera's Andy Gallacher reports from Miami, Florida. - Subscribe to our channel: http://aje.io/AJ…	0.0299498	2016-10-03T06:03:00.000Z	0.02994982	0.11266974	0.03875651	africa	africa	1
223	zh9aJxUUudw	My Nigeria - Coming Soon promo	Six diverse Nigerians invite us into their worlds, sharing their stories in their own words and presenting a broader picture of Nigeria than the clichés all too often suggest. Subscribe to our channel http://bit.ly/AJSubscribe Follow us on Twitter https://twitter.com/AJEnglish Find us on Facebook https://www.facebook.com/aljazeera Check our website: http://www.aljazeera.com/	0.0300247	2015-08-11T10:00:59.000Z	0.014773568	0.16085838	0.11417745	africa	africa	1
224	jenTuMsKkik	Sri Lanka floods: Volunteers help with clean-up	It has been a week since floods and landslides hit parts of Sri Lanka, killing at least 94 people. The government has declared certain areas a high security zone to allow for proper clean-up and rescue operations. And it's volunteers on the ground who are making an impact. Al Jazeera's Minelle Fernandez reports from Colombo. - Subscribe to our channel: http://bit.ly/AJSubscribe - Follow us on Twi…	0.0300818	2016-05-25T00:24:33.000Z	0.030081766	0.11186601	0.10921851	africa	africa	1
225	ByQoBKmxFus	Ali Al-Habsi Thank You, Football Ep 2	'I'm so happy to be in a country like England. They respect our religion as a Muslim player.' Watch Omani footballer Ali Al-Habsi, in Thank You, Football Episode 2: http://aje.io/fjsg	0.030212	2016-11-29T17:25:06.000Z	0.030212002		0.0019629167	sport	sport	18
226	e7qzIMkCpJM	Malaysia festival celebrates indegenous music	Thousands gather in Sarawak for a festival that celebrates indigenous musicians and their cultural heritage. Jamela Alindogan reports. Subscribe to our channel http://bit.ly/AJSubscribe Follow us on Twitter https://twitter.com/AJEnglish Find us on Facebook https://www.facebook.com/aljazeera Check our website: http://www.aljazeera.com/	0.030212	2014-06-21T11:26:56.000Z	0.030212002	0.087688364	0.019835781	arts & culture	arts & culture	2
227	OK_OA1RH204	Fault Lines - Chicago’s Police Union on the Code of Silence	When Fault Lines asked the president of Chicago’s Fraternal Order of Police, Dean Angelo, about the code of silence among police, he said 'Everybody has it” and invoked sex abuse among the clergy. For the full episode of Fault Lines, “The Contract,” click here: https://www.youtube.com/watch?v=s8-YcKC_mhI Subscribe to our channel http://bit.ly/AJSubscribe Follow us on Twitter https://twitter.com/A…	0.03032	2016-12-07T14:42:54.000Z	0.030320019		0.1205297	donald trump	us & canada	19
228	5RxD66pnKk0	People and Power - Growing Up Behind Bars promo	Subscribe to our channel http://bit.ly/AJSubscribe The harrowing behind-the-scenes story of Afghanistan's prison children.	0.030726	2014-07-24T03:04:05.000Z	0.03072602	0.16625264	0.13491967	afghanistan	middle east	12
229	UeLo2UIQiQw	Channel Generic promo	- Subscribe to our channel: http://aje.io/AJSubscribe - Follow us on Twitter: https://twitter.com/AJEnglish - Find us on Facebook: https://www.facebook.com/aljazeera - Check our website: http://www.aljazeera.com/	0.0310283	2017-02-26T15:27:53.000Z	0.031028306000000002	0.11005075	0.0071871737	media	media	11
230	MR6lc1wYKgE	One Rohingyan refugee's struggle in Thailand	For decades, Rohingya Muslims have been fleeing Myanmar -- a mainly Buddhist country where they're denied basic rights. In recent weeks, boatloads of refugees have tried to enter neighbouring Thailand, but for those who've managed to settle there life can still be a struggle. Al Jazeera's Scott Heidler travelled to the northern Thai city of Chiang Mai to hear one refugee's story.	0.0313242	2015-06-14T15:58:00.000Z	0.031324173999999996	0.22839117	0.0862151	myanmar	asia	3
231	ZxewXfc7kPw	72-hour ceasefire begins in Yemen	A 72-hour ceasefire between warring sides in Yemen's two-year conflict is now under way across the country. The Saudi-led coalition says it's committed to the truce with Houthi rebels, but Yemenis fear it might not last. Al Jazeera’s Rob Matheson explains. - Subscribe to our channel: http://aje.io/AJSubscribe - Follow us on Twitter: https://twitter.com/AJEnglish - Find us on Facebook: https://www…	0.0313514	2016-10-20T18:44:51.000Z	0.006497148	0.046145786	0.03253208	middle east	middle east	12
232	_9LyN7vFD9w	Innovative scheme turns Colombia’s at-risk children to entrepreneurs	After more than 50 years of fighting, the Colombian government and FARC rebels have reached a peace deal. It is now hoped peace will help transform neglected rural areas affected by violence. One innovative university programme called Utopia turns poor students from violent areas to agriculture entrepreneurs. Al Jazeera’s Alessandro Rampietti reports from Yopal in central Colombia. - Subscribe to…	0.0313938	2016-08-25T07:52:36.000Z	0.03139377	0.12333915	0.13207316	africa	africa	1
233	QH6HJgvfv0Q	World Press Freedom Day - promo	Subscribe to our channel http://bit.ly/AJSubscribe Al Jazeera marks World Press Freedom Day with a special live broadcast including contributions from international dignitaries.	0.0313969	2015-04-30T18:46:22.000Z	0.031396917999999996	0.033922587000000004	0.0046713557	media	media	11
234	QHb6VBc2t6k	Chaplin's novel manuscript found in archives	Charlie Chaplin is an icon of the film world but - almost thirty years after his death - he could now make a name for himself in another arena. A novella - or short novel - was discovered among his archives - and now it's been published. Al Jazeera's exi O'Brien has more on the story.	0.0314253	2014-02-05T08:05:28.000Z	0.03142526	0.011613205	0.0483502	arts & culture	arts & culture	2
235	j-vLIhiV6nE	The Cure - Flying Eye Hospital - Part 2	Subscribe to our channel http://bit.ly/AJSubscribe Subscribe to our channel http://bit.ly/AJSubscribe In Zambia, more than 30,000 children are visually impaired. According to the charity Orbis, the country is home to 10 percent of Africa's visually impaired children. In this segment of The Cure, Dr Joff Lacey follows Lucy as she undergoes life-changing treatment at Zambia's only paediatric eye cl…	0.0316309	2013-06-14T00:35:42.000Z	0.01635712	0.053354394000000006	0.028667724	media	media	11
236	CdTwjNZ9iUk	US tobacco's hidden children	Human Rights Watch has released a new report detailing the hazardous conditions that children in the US endure as they legally work on tobacco farms. Under US law, children as young as 12 can toil in tobacco fields. HRW says many report symptoms consistent with acute nicotine poisoning, as Al Jazeera's Shihab Rattansi reports. Subscribe to our channel http://bit.ly/AJSubscribe Follow us on Twitte…	0.0316844	2015-12-10T12:24:35.000Z	0.031684395	0.31271777	0.07780465	human rights	human rights	8
237	8BfizLqZzxI	DR Congo opposition calls for nationwide strike	Opposition parties in the Democratic Republic of Congo have called for a nationwide strike, to put pressure on President Joseph Kabila to step down when his term expires in December. They believe that there is a deliberate move to delay the elections beyond this year. The electoral commission says it needs $1.2 bln to plan for the polls, but the government says it doesn't have enough money. Al Ja…	0.031709	2016-02-16T07:50:45.000Z	0.031708978	0.10333827	0.049919426	africa	africa	1
238	fULYuyyGvsM	Gravitational wave test spacecraft launched	The European Space Agency latest mission, Lisa Pathfinder, has successfully launched from its spaceport in French Guiana. The spacecraft has an experiment onboard that could revolutionize our understanding of the Universe. - Subscribe to our channel: http://bit.ly/AJSubscribe - Follow us on Twitter: https://twitter.com/AJEnglish - Find us on Facebook: https://www.facebook.com/aljazeera - Check ou…	0.0317385	2015-12-03T19:36:12.000Z	0.020411693999999998	0.01287316	0.004357761	science & technology	science & technology	17
239	79ubdXCcTbM	Post Script - Charles Stratford Dec 2014 promo	Subscribe to our channel http://bit.ly/AJSubscribe Post Script - Charles Stratford Dec2014 promo	0.0317743	2014-12-07T16:37:46.000Z	0.03177434	0.039536428	0.06384746	media	media	11
240	edN77gzinzg	Al Jazeera talks to political analyst Shadi Hamid	Subscribe to our channel http://bit.ly/AJSubscribe Shadi Hamid is the Director of Research at the Brookings Center here in Doha. He comments about current political tension in Egypt. At Al Jazeera English, we focus on people and events that affect people's lives. We bring topics to light that often go under-reported, listening to all sides of the story and giving a 'voice to the voiceless.' Reach…	0.0318427	2013-07-01T20:33:47.000Z	0.03879096	0.08927619	0.012228492	media	media	11
241	-0TG6oC0qag	earthrise - How it works: Way Out Wind	How pioneering designs could revolutionise the way we harness wind.	0.0319706	2016-01-28T17:27:09.000Z	0.051671524	0.08461758	0.019431233	arts & culture	arts & culture	2
242	YUoy6lNaycA	Bangladesh factory safety revisited	A series of disasters in Bangladesh's garment industry have led to owners, retail brands, and the government promising to make changes. But so far, it's been more talk than action. Now, the international Labour organization is launching a program that will put factories' safety measures under greater scrutiny. Maher Sattar has more from Dhaka.	0.0319717	2013-10-22T20:41:53.000Z	0.03197166	0.015909329	0.010968208	asia	asia	3
243	ngnuu2bLGhU	Earthrise - Coming Soon promo	earthrise explores solutions to the environmental challenges we all face, taking an upbeat look at ecological, scientific, technological and design projects the world over.	0.0319934	2015-11-16T17:46:00.000Z	0.03199336	0.123134226	0.007325531999999998	africa	africa	1
244	WMgcR3HmLpI	Refugee crisis: The story of its children	Al Jazeera's Hoda Abdel-Hamid reports from the Greek-Macedonia border.	0.0320176	2015-09-17T09:24:19.000Z	0.04129663	0.13627444	0.015244277	egypt	middle east	12
245	yfXcZLe1P84	Inside Story - Has austerity worked?	As Spain shakes free from its bailout, we ask if Europe is on the road to economic recovery.	0.0320897	2014-01-24T10:32:01.000Z	0.03208969	0.04653008	0.11476521	europe	europe	6
246	oiNAKetYjDg	Techknow - Lungs in a Box promo	Subscribe to our channel http://bit.ly/AJSubscribe Science series celebrating innovation across the world and exploring how the latest scientific discoveries are changing our lives.	0.0323679	2014-10-28T10:39:35.000Z	0.032367874	0.12681536	0.0045133056	middle east	middle east	12
247	S7mxirHjiVI	South Africa Up - 7Up	In 1992 apartheid South Africa, we meet 20 lively seven-year-olds, who we follow every seven years in times of change. - Subscribe to our channel: http://bit.ly/AJSubscribe - Follow us on Twitter: https://twitter.com/AJEnglish - Find us on Facebook: https://www.facebook.com/aljazeera - Check out our website: http://www.aljazeera.com/	0.0323789	2016-01-22T21:23:58.000Z	0.020697553	0.149515	0.01111065	africa	africa	1
248	Q4CsWi10F-I	Al Jazeera Correspondent - MS & Me: Interview with Dr Anna Williams	Dr. Anna Williams from the Centre for Regenerative Medicine at the University of Edinburgh discusses her latest research findings with Al Jazeera's Stephanie Scawen.	0.0325575	2016-02-04T21:44:03.000Z	0.03255747	0.021958982999999998	0.031080358	middle east	middle east	12
249	vWKYrRs9Lnc	The Philippines holds Silent Film Festival	Audiences in the Philippines have been attending the country's 7th International Silent Film Festival. The only event of its kind in Asia, the festival is reviving popularity in old silent classics through the power of modern music. Al Jazeera's Rob Mcbride reports from Manila.	0.0325991	2013-08-27T01:02:13.000Z	0.032599125	0.032503467	0.009135871	arts & culture	arts & culture	2
250	wBx45njh1Ig	Leicester City arrive in Bangkok to a hero's welcome	Premier League champions Leicester City arrive in Bangkok for a celebratory visit arranged by the club's billionaire Thai owner. Al Jazeera's Scott Heidler reports from Bangkok. - Subscribe to our channel: http://bit.ly/AJSubscribe - Follow us on Twitter: https://twitter.com/AJEnglish - Find us on Facebook: https://www.facebook.com/aljazeera - Check our website: http://www.aljazeera.com	0.032629	2016-05-29T00:57:30.000Z	0.06077052	0.050309457	0.0093711	africa	africa	1
251	tvQGJNRTXZc	Techknow - Inside the CSI promo	Subscribe to our channel http://bit.ly/AJSubscribe Science series celebrating innovation across the world and exploring how the latest scientific discoveries are changing our lives.	0.0326962	2014-11-07T07:56:37.000Z	0.032696206	0.13396660000000002	0.0045133056	middle east	middle east	12
252	VAL7yvlp6yU	Covering Libya's First Post-Gaddafi Elections - The Listening Post (Full)	Subscribe to our channel http://bit.ly/AJSubscribe When Libyans vote in the country's first free elections in almost five decades, will they have had the benefit of a free and independent media to help them make an informed decision? Since Muammar Gaddafi's downfall, the country has seen a proliferation of news outlets, from print, broadcast and online. But after decades under Gaddafi's state-run…	0.0327718	2012-07-17T02:00:14.000Z	0.03277175	0.09094088	0.026825316	asia	asia	3
253	yacahTkRcbk	Witness - Days of Hope promo	An intimate look at the shocking struggles of illegal refugees travelling across the Mediterranean, from Africa to Europe.	0.0327743	2015-06-24T21:12:28.000Z	0.032774262	0.06422429	0.410219	africa	africa	1
254	-C4KcJVvLcg	Brussels welcomes appointment of May as British PM	The European Commission is watching Theresa May closely as the new UK Prime Minister leads Brexit negotiations. Brussels has welcomed the quick changeover and the experience May brings as a politician. Al Jazeera’s Natacha Butler reports from Brussels. - Subscribe to our channel: http://aje.io/AJSubscribe - Follow us on Twitter: https://twitter.com/AJEnglish - Find us on Facebook: https://www.fac…	0.0327778	2016-07-13T21:42:43.000Z	0.008376109	0.008728689	0.014230098	europe	europe	6
255	wScO_6vm5Fw	People & Power - Kazakhstan: Poisoned Legacy promo	Subscribe to our channel http://bit.ly/AJSubscribe Kazakhstan has a dreadful environmental record but is a major international mining company making it worse?	0.0328418	2014-02-13T18:57:05.000Z	0.03284177	0.46095464	0.23754409	united states	us & canada	19
256	e-jCkbLuQBk	Schumacher condition has 'improved slightly'	Michael Schumacher's condition has improved after more surgery, according to the hospital staff where he is being treated. Doctors treating Schumacher had previously refused to predict an outcome for the Formula One great, who is fighting for his life after a skiing accident in the French Alps. Al Jazeera’s Emma Hayward reports.	0.0328927	2014-01-01T07:23:00.000Z	0.032892685	0.05908067	0.0039491924	europe	europe	6
257	IvYxeGlskHk	Crossword puzzle clebrates its centenary	What's 100 years old and remains a mystery to this day? The answer is the crossword which has provided light relief to generations ever since it first appeared in New York in 1913. Al Jazeera's Phil Lavelle takes a look at the staying power of the puzzle.	0.0329676	2013-12-21T17:36:12.000Z	0.032967623	0.13024922	0.023577636000000003	united states	us & canada	19
258	Nb1uXvck8LQ	Architects lay out future designs at festival	At the annual World Architecture Festival, designers have been outlining their ideas for our future buildings. And when it comes to where we'll live and where we'll work, it's the environment, not surprisingly, that's turning out to be the major consideration. Al Jazeera's Rob McBride reports from the festival in Singapore.	0.0331159	2013-10-05T03:11:33.000Z	0.03311589	0.06608734	0.011687311	arts & culture	arts & culture	2
259	S3ogZztLICQ	S Sudan's athlete competes as independant	Subscribe to our channel http://bit.ly/AJSubscribe Subscribe to our channel http://bit.ly/AJSubscribe On Sunday the last athletics event of London 2012 will take place. Runners from Ethiopia and Kenya are expected to resume their rivalry in the men's marathon. But 28-year-old Guor Marial from South Sudan who will compete as an independent Olympic athlete while he waits for his country to receive …	0.0331382	2012-08-11T21:29:36.000Z	0.020137476	0.21479754	0.008164727	africa	africa	1
260	R2HfMRwUAlQ	Artscape - Poets of Protest - Yehia Jaber: Laughter is My Exit	Subscribe to our channel http://bit.ly/AJSubscribe Arabic poets are responding to the changing Middle East. One such poet is Yehia Jaber, who fought with the communists during Lebanon's long civil war. He journeys across the country to discover why he now battles for change with nothing but words.	0.0331515	2012-09-17T23:47:21.000Z	0.03315153	0.11345285	0.0726444	lebanon	middle east	12
261	NlJNq8fnNP0	earthrise - Restoring Peru’s Ancient Canals, CryoCoral Conservation & Future Farms in Tokyo promo	Why Lima is using ancient stone canals to solve its water crisis, vegetables factories in Japan & safeguarding the future of Hawaii's coral.	0.0331572	2015-05-17T16:51:50.000Z	0.03315725	0.049553957	0.06770114599999999	asia pacific	asia	3
262	p0nHPNVVmJQ	America votes: Alternatives to mainstream parties	Americans have consistently told pollsters that the US needs a third political party to take on the Republicans and Democrats. Last year, four out of 10 US adults said they did not identify with either parties. But few voters have heard of the alternatives, as Al Jazeera's Shihab Rattansi explains. - Subscribe to our channel: http://bit.ly/AJSubscribe - Follow us on Twitter: https://twitter.com/A…	0.0332119	2016-04-16T10:58:37.000Z	0.03321192	0.04828022	0.03772826	politics	politics	13
263	iWamMm2nf2k	Marco Polo: A Very Modern Journey - Generic promo	Subscribe to our channel http://bit.ly/AJSubscribe A contemporary re-tracing of Marco Polo’s 13th century journey, exploring the world he witnessed and contemplating East and West today - people, places, power and perceptions.At Al Jazeera English, we focus on people and events that affect people's lives. We bring topics to light that often go under-reported, listening to all sides of the story a…	0.0332182	2014-08-17T18:14:57.000Z	0.039689182999999996	0.03630848	0.010960679	media	media	11
264	082Q5f31j3M	The Stream - Looking back with a laugh	Subscribe to our channel http://bit.ly/AJSubscribe On The Stream: A light hearted look back at 2013, and what lies ahead for 2014 At Al Jazeera English, we focus on people and events that affect people's lives. We bring topics to light that often go under-reported, listening to all sides of the story and giving a 'voice to the voiceless.' Reaching more than 270 million households in over 140 coun…	0.0332976	2013-12-31T10:01:42.000Z	0.030189432000000002	0.09191642	0.025884800000000003	media	media	11
265	EvAiwhqaW4Y	Sierra Leone moves to contain Ebola spread	Health officials say they are struggling to convince people to go for treatment. Making it harder to contain the spread of the virus. Ama Boateng reports. Subscribe to our channel http://bit.ly/AJSubscribe Follow us on Twitter https://twitter.com/AJEnglish Find us on Facebook https://www.facebook.com/aljazeera Check our website: http://www.aljazeera.com/	0.0333449	2014-07-03T15:28:34.000Z	0.033344932	0.29215986	0.0878081	health	health	7
266	dS1M6hWrSH0	reVIEW: Al Jazeera’s weekly Programme Highlights (Jun 14-20)	Subscribe to our channel http://bit.ly/AJSubscribe Al Jazeera English had many interesting and varied programmes on the channel this past week. Here are our top three picks: 1 - 'Hard Earned' tells the story of five ordinary American families as they face the reality of everyday life in a post-recession economy [http://aje.io/g47k]. 2 - In 'Chechnya: War Without Trace', Witness - Al Jazeera looks…	0.0334668	2015-06-23T10:33:08.000Z	0.03346681	0.007771064499999998	0.06250259999999999	media	media	11
267	4O_sbIWTSr0	Rebel Geeks - Meet Your Maker	The maker movement is promising to reshape our relationship with the design and manufacture of computers and electronic devices by bringing a DIY approach into this field that has - so far - remained the exclusive domain of big industry. At the heart of this revolution is the Arduino - a tiny, sky blue circuit board. We meet Italian technology designer Massimo Banzi at the Maker Faire in Shenzen,…	0.0335305	2015-11-29T12:25:03.000Z	0.042277757	0.5799207	0.045410473	asia pacific	asia	3
268	Kto97srX6Ug	Featured Documentary - Life Apps - World of Apps promo	Subscribe to our channel http://bit.ly/AJSubscribe From Soweto to London Life Apps meets young developers working on apps for social good and looks back at what designers from the series have achieved	0.0335315	2013-12-16T18:10:13.000Z	0.033531528	0.019869863999999998	0.015749441	europe	europe	6
269	-3wahRpogFc	Featured Documentary - 7 UP Cominig Soon promo	Subscribe to our channel http://bit.ly/AJSubscribe In a series two decades in the making, 8 South African films chart the diverse lives of the children of apartheid.	0.0335315	2013-11-21T01:18:45.000Z	0.033531528	0.10853871	0.017522793000000002	africa	africa	1
270	nxzNPciM1s4	Gambia politics: Adama Barrow appoints his cabinet	Gambia's new President Adama Barrow has finally appointed his cabinet, and many say the first order of business should be justice for victims of the former president Yahya Jammeh's autocratic rule. Al Jazeera's Reza Sayah reports from Banjul. - Subscribe to our channel: http://aje.io/AJSubscribe - Follow us on Twitter: https://twitter.com/AJEnglish - Find us on Facebook: https://www.facebook.com/…	0.0335502	2017-02-02T02:57:33.000Z	0.016871402	0.12378773	0.051726673	africa	africa	1
271	b6Lvp7BRh4w	Inside Story - South Africa: Wake-up call for ANC?	On Inside Story we ask: do elections mark a turning point in South Africa's post-Apartheid history	0.0335707	2014-05-10T21:00:17.000Z	0.03357066	0.039933647999999995	0.16498467	africa	africa	1
272	d8ncPY_Hc_U	Egypt court releases Al Jazeera journalists on bail	An Egyptian court has ordered the release of detained Al Jazeera journalists Baher Mohamed and Mohamed Fahmy on bail. Al Jazeera's Victoria Gatenby reports.	0.0335806	2015-02-12T22:05:40.000Z	0.033580642	0.13188607	0.04129364	egypt	middle east	12
273	m_HAAOD3dgQ	Rosetta spacecraft set to end comet mission	The European Space Agency’s Rosetta spacecraft is set to make a 'controlled crash' onto the surface of a comet after a 12-year mission. Rosetta, the first spacecraft to orbit a comet, has been collecting detailed data for the last two years. During its descent the craft will take high-resolution images and use its 11 instruments to measure conditions near the comet’s surface. Al Jazeera’s technol…	0.033689	2016-09-30T15:13:11.000Z	0.041124947	0.016877932	0.020135058	africa	africa	1
274	ghL09eRdMbk	Unfriendly neighbours in the Kivus	Subscribe to our channel http://bit.ly/AJSubscribe Did Rwanda have a role in escalating conflict in the Democratic Republic of Congo? At Al Jazeera English, we focus on people and events that affect people's lives. We bring topics to light that often go under-reported, listening to all sides of the story and giving a 'voice to the voiceless.' Reaching more than 270 million households in over 140 …	0.0338459	2012-07-05T21:34:34.000Z	0.03384588	0.42639099999999996	0.024029706	europe	europe	6
275	1Aphnus-QXU	Egypt seeks extradition of Al Jazeera journalist	Egypt's attorney general has asked Germany to extradite Al Jazeera journalist Ahmed Mansour. The reporter is spending his second night in custody after being detained at Berlin airport. He says the accusations against him, which include torture, are absurd. Over 20,000 people have signed a petition demanding Mansour's immediate release. Al Jazeera's Paul Brennan reports from Berlin.	0.0338801	2015-06-22T07:30:55.000Z	0.03388007	0.23169129	0.08627071	africa	africa	1
276	tQ0_9b4j37M	Come from away: Canadian musical show set for Broadway	A Canadian musical about events unfolding in a small town in Newfoundland following the September 11 attacks is set for Broadway. Thousands of passengers landed at Gander airport when US airspace was closed following the attacks. The musical tells the story of how locals helped feed and house them. Al Jazeera's Daniel Lak reports from Toronto. - Subscribe to our channel: http://aje.io/AJSubscribe…	0.0339098	2017-02-19T16:02:28.000Z	0.033909757	0.06631076	0.025238285	africa	africa	1
277	ZtDM7QPJmAU	Latin America appeals for help in fighting Zika virus	The spread of the Zika virus has topped a meeting of Latin American leaders in Ecuador. Brazil's president Dilma Rouseff says they have a joint responsibility to fight the virus. Al Jazeera's Lucia Newman reports. - Subscribe to our channel: http://bit.ly/AJSubscribe - Follow us on Twitter: https://twitter.com/AJEnglish - Find us on Facebook: https://www.facebook.com/aljazeera - Check our website…	0.0339364	2016-01-30T11:46:06.000Z	0.03393645	0.21284227	0.074148305	latin america	latin america	10
278	Fp8Boxx854w	Rio carnival celebrates city's 450-year history	Dancers and partygoers have taken to the streets in Rio de Janeiro, marking the first day of the carnival parade. Two million people are expected to take part in the five-day-long event. Coinciding with carnival, the city has begun celebrating its 450th birthday. Al Jazeera's Lucia Newman reports from Rio de Janeiro, a city that besides samba and glamour is known for overcrowding and high murder …	0.0340681	2015-10-01T13:51:41.000Z	0.03406815	0.037322997999999996	0.038261823	latin america	latin america	10
279	grzZnmYqnHs	Two Koreas agree to reopen Kaesong industrial zone	In a rare agreement, North and South Korea are to reopen the Kaesong joint industrial complex. Kaesong is regarded as the last symbol of co-operation between North and South - but was closed in April at a time of rising tensions. Al Jazeera's Florence Looi has more from Seoul. For more on this story, click here: http://aje.me/19hyNwO	0.0341146	2013-08-15T10:53:16.000Z	0.059698142	0.04568208	0.01666643	asia pacific	asia	3
280	HKa7mNEXbzY	'Emergency cinema' highlights Syria's war	Three years of conflict in Syria have produced a new genre of film-making that some are calling 'emergency cinema'. The films are short, the film-makers anonymous. But as Al Jazeera's Kristen Saloomey reports, the work is getting international recognition this week in New York City. Subscribe to our channel http://bit.ly/AJSubscribe Follow us on Twitter https://twitter.com/AJEnglish Find us on Fa…	0.034133	2014-06-24T20:08:59.000Z	0.034133042999999995	0.10960602	0.011497152	arts & culture	arts & culture	2
281	MM0iNzs1UPE	Senegal optimistic about The Gambia’s president-elect	The Gambia’s President-elect Adama Barrow is talking to potential ministers to form a new government. Barrow is replacing veteran president Yaya Jammeh who has ruled the country for 22 years.	0.0342125	2016-12-05T05:47:40.000Z	0.034212507		0.11512637	europe	europe	6
282	HDGyw__wZ3s	Brazil's Rousseff says impeachment proceedings a 'coup'	Brazilian President Dilma Rousseff's political troubles are only getting worse. On Friday, her main coalition ally resigned and appeals to stop her impeachment were also quashed by the Supreme Court. Al Jazeera’s Teresa Bo reports from Brasilia.	0.0342543	2015-12-05T08:35:26.000Z	0.034254305	0.15155463	0.05163971	middle east	middle east	12
283	unypZXKOgZk	Libya media accused of incitement	Subscribe to our channel http://bit.ly/AJSubscribe Subscribe to our channel http://bit.ly/AJSubscribe A Libyan government committee has accused the country's media of inciting violence, saying there is no legal avenue to monitor the press. The committee warned that leaders of armed groups often own TV stations that are misused for incitement and defamation. In the three years since the Libya revo…	0.0342546	2014-04-18T15:31:00.000Z	0.034254599999999996	0.33652234	0.043313785999999986	libya	africa	1
284	cJa0yYamj2Q	Brazilians mourn plane crash victims	Thousands of people stood in the pouring rain at the Chapeco stadium in Brazil to pay farewell to players and officials from the football team who perished in Monday's plane crash.	0.0343326	2016-12-04T07:14:14.000Z	0.034332596		0.05860896400000001	sport	sport	18
285	xlaWgysPyg8	Colombia: Investigation begins for Mocoa disaster	It's been a week since a devastating landslide killed more than 300 people in the Colombian city of Mocoa. A recovery operation continues for those still missing and a 30 day state of emergency remains in place to allow the government to speed up the reconstruction effort. But there is growing concern over what caused the disaster. Al Jazeera’s Lucia Newman reports from Mocoa. - Subscribe to our …	0.0344832	2017-04-09T22:41:34.000Z	0.034483198	0.19835459	0.10197429	latin america	latin america	10
286	DeTHWzVS4QA	News Bulletin - 03:35 GMT update	Subscribe to our channel http://bit.ly/AJSubscribe The main headlines on Al Jazeera English, featuring the latest news and reports from around the world. Subscribe to our channel http://bit.ly/AJSubscribe Follow us on Twitter https://twitter.com/AJEnglish Find us on Facebook https://www.facebook.com/aljazeera Check our website http://www.aljazeera.com/	0.0345038	2014-11-03T14:06:00.000Z	0.050089996	0.029683022000000007	0.022054976	media	media	11
287	S9fSVkMkqoM	Police chief's fall may topple top Chinese official	Subscribe to our channel http://bit.ly/AJSubscribe When former Chongqing municipality police chief Wang Lijun confessed to taking bribes and covering up the murder of British businessman Neil Heywood, he may have signed the death warrant for Communist Party star Bo Xilai's career. Bo's wife has been convicted of poisoning Heywood over an extortion attempt, and Wang was reportedly pressured by Bo …	0.0346334	2012-09-24T11:09:56.000Z	0.034633443	0.18175165	0.06107176	media	media	11
288	AW35MJ3d6Yw	Inside Story - How safe is your personal information on the internet?	In today's digital world, data is king. And as we move more and more of our lives online, the risk of fraud and identity theft grows ever larger. Hundreds of billions of dollars are lost every year because of cyber attacks, and it's something that affects us all; individuals, businesses and governments alike. In February, hackers accessed an account held by Bangladesh's central bank at New York's…	0.0347551	2016-04-29T11:04:33.000Z	0.034755122	0.041049927	0.061115025999999996	science & technology	science & technology	17
289	JxJRoetjuZs	Crowdfunding shareholders a new option for start-up businesses	Getting money to start a business is always a challenge because banks are cautious and investment funds can be hard to access. Al Jazeera's Technology editor Tarek Bazley reports from Palo Alto on a new way to fund startups. - Subscribe to our channel: http://aje.io/AJSubscribe - Follow us on Twitter: https://twitter.com/AJEnglish - Find us on Facebook: https://www.facebook.com/aljazeera - Check …	0.0350365	2016-06-26T07:36:26.000Z	0.04087217	0.14122067	0.009069756	business & economy	business & economy	4
290	v9TOMf94ss0	earthrise - Fish Net Fashion	Every year, around 640,000 tonnes of fishing gear is lost or discarded in our seas and oceans. The gear traps, injures, mutilates and even kills hundreds of thousands of sea animals. Abandoned fish nets, known as ‘ghost nets’, are usually lost in storms, snagged on reefs or even tangled when boats operate in crowded waters. But one organisation, the Healthy Seas Initiative, has given these nets a…	0.0350459	2017-08-20T18:10:27.000Z	0.022523873	0.11237659	0.058100443	europe	europe	6
291	vtWJuYThO-4	High inflation weighs heavily on Sudanese voters	Voters in Sudan are heading to polls on Monday for the presidential and parliamentary elections, which opposition parties have threatened to boycott. The ruling party said it has pulled the economy out of a tailspin after the South's secession. But for most of the population, almost half of whom live below the poverty line, is mainly concerned with putting food on the table with overall inflation…	0.0350523	2015-04-08T15:47:33.000Z	0.035052318	0.11470874	0.05509873	africa	africa	1
292	MEw3C3w6bhg	Examining the British election drama - The Listening Post (Full)	On May 7, 2015, the UK voted and the incumbent Prime Minister David Cameron and his Conservative Party won a majority. It was a result that no-one had expected. The polls predicted another coalition government and most news outlets reported it as a neck-and-neck race right up until the end. The media have played a big role in this election and once again media ownership has been a crucial factor.…	0.0351207	2015-05-23T12:01:31.000Z	0.035120726	0.06756766	0.0484183	media	media	11
293	SgsTCwKtlQQ	Charity offers hope to Mexico's Mixtec elderly	In Mixtec, the elderly population is largely alone as younger family members leave to seek opportunities. Al Jazeera's John Holman reports. - Subscribe to our channel http://bit.ly/AJSubscribe - Follow us on Twitter https://twitter.com/AJEnglish - Find us on Facebook https://www.facebook.com/aljazeera - Check out our website:http://www.aljazeera.com/	0.0351776	2015-06-02T00:49:08.000Z	0.033253899999999996	0.2073775	0.013082192	politics	politics	13
294	FszScRbfrAg	French government stands firm amid labour protests	The French government has refused to back down on new labour laws despite mass protests. Police in Paris again used tear gas to disperse demonstrators, who say the changes will remove workers' rights. Al Jazeera’s Nadim Baba reports from Paris. - Subscribe to our channel: http://bit.ly/AJSubscribe - Follow us on Twitter: https://twitter.com/AJEnglish - Find us on Facebook: https://www.facebook.co…	0.0352077	2016-05-21T16:27:48.000Z	0.04918847	0.12029313	0.058412343	europe	europe	6
295	MTowNfSVpwE	Counting the Cost - Economics of the British elections	Subscribe to our channel http://bit.ly/AJSubscribe As UK election campaigns are under way, we examine the economic issues at the heart of the battle for votes. At Al Jazeera English, we focus on people and events that affect people's lives. We bring topics to light that often go under-reported, listening to all sides of the story and giving a 'voice to the voiceless.' Reaching more than 270 milli…	0.0352938	2015-04-11T14:55:54.000Z	0.035293754	0.03428227	0.010897416000000002	europe	europe	6
296	9SppeWKoFJY	Guantanamo 22 - Ep2 promo	The incredible odyssey of 22 men from China’s Uighur minority who were sold in Afghanistan and imprisoned in Guantanamo Bay as terrorists. - Subscribe to our channel: http://bit.ly/AJSubscribe - Follow us on Twitter: https://twitter.com/AJEnglish - Find us on Facebook: https://www.facebook.com/aljazeera - Check out our website: http://www.aljazeera.com/	0.035326	2015-12-09T05:45:28.000Z	0.03532602	0.09158021	0.13673149	asia	asia	3
297	L5L2UXsD0i8	Millions of the world's poorest saved by Nobel winners	This year's Nobel prize for medicine has been awarded to three researchers who have made important contributions towards tackling human diseases in developing parts of the world. William Campbell and Satoshi Omura were awarded the prize for their work on a therapy against roundworm and combating parasites in humans.	0.0354816	2015-10-07T07:07:32.000Z	0.025813417999999998	0.07453729	0.104889624	asia	asia	3
298	mne5XUsVJis	People & Power - Bulgaria - Wrestled to the Ground promo	Subscribe to our channel http://bit.ly/AJSubscribe Investigating why Bulgarians have spent a year protesting against corruption at the heart of government	0.0354929	2014-04-16T18:13:07.000Z	0.03549287	0.081848554	0.17545108	middle east	middle east	12
299	sKulv2_xXig	Iraqi interpreters' long wait for US visas	Iraqi interpreters who assisted the US military during the American occupation are worried that time is running out for them to be granted US visas. The interpreters and their families were promised the visas in exchange for their services. Al Jazeera's John Terrett reports from Connecticut.	0.0355768	2016-09-26T10:55:16.000Z	0.009928211999999999	0.11122884599999999	0.01974759	iraq	middle east	12
300	ZVVmz2VqU_I	TechKnow - Distracted Driving promo	Driving with a smartphone? Kosta and Lindsay go head to head in a variety of tests designed to show how modern technology impacts on how well we drive. - Subscribe to our channel: http://bit.ly/AJSubscribe - Follow us on Twitter: https://twitter.com/AJEnglish - Find us on Facebook: https://www.facebook.com/aljazeera - Check out our website: http://www.aljazeera.com/	0.0356621	2015-12-06T19:46:19.000Z	0.03566212	0.25619936	0.08972758	africa	africa	1
301	lLIuYTbusN8	Nepal earthquake: Memories haunt survivors, one year on	In the days following the April 25, 2015 earthquake and aftershock, Al Jazeera met 11-year-old Reshma Shrestha. She was standing in the rubble of a village - waiting for rescue teams to recover the bodies of her mother and brother. One year on, Al Jazeera’s Subina Shrestha, went back to Sanghachowk to meet her. - Subscribe to our channel: http://bit.ly/AJSubscribe - Follow us on Twitter: https://…	0.0357211	2016-04-25T11:22:01.000Z	0.035721052	0.01774687	0.01725626	united states	us & canada	19
302	zsUFqP0gF9U	Featured Documentary - Black France episode 2 promo	Subscribe to our channel http://bit.ly/AJSubscribe Episode two of the documentaries series looking at the life of African immigrants in France.	0.0358021	2013-08-30T23:11:30.000Z	0.03580212	0.06944701	0.017335657	africa	africa	1
303	oUs0YBLJgHc	The global garden influence of the UK’s ‘Capability Brown’	Fans of British period dramas will immediately recognise the work of England’s Lancelot Brown – the country’s most famous garden designer. Because of his astute planning exploits, he was nicknamed “Capability” for the stunning outdoor looks that have been exported all over the world. Al Jazeera’s Jessica Baldwin looks at his unique efforts as the 300th anniversary of Brown’s birth is celebrated. …	0.0359471	2016-05-17T16:47:53.000Z	0.03033114	0.24314757	0.035853956	europe	europe	6
304	3w12rnrhGJo	Will Tunisia pass the transition test?	Tunisians go to the polls to choose their first democratically elected president The vote on Sunday will mark the final stage of the transition in the country's whose revolution led to what became known as the Arab Spring. The two candidates represent two opposing groups in Tunisian society. One associated with the old regime, while the other promising real change after the 2011 revolution So, wh…	0.0359774	2014-12-20T20:36:15.000Z	0.03597739	0.02524284	0.020399168	politics	politics	13
305	ZEe9481GRUw	Post Script - Minelle Fernandez promo	Subscribe to our channel http://bit.ly/AJSubscribe Post Script - Minelle Fernandez promoAt Al Jazeera English, we focus on people and events that affect people's lives. We bring topics to light that often go under-reported, listening to all sides of the story and giving a 'voice to the voiceless.' Reaching more than 270 million households in over 140 countries across the globe, our viewers trust …	0.0359902	2014-09-01T14:02:47.000Z	0.03599018	0.13222654	0.013053899	media	media	11
306	PyKY1dhdivU	Learning in the jungle: Guatemala's rural education	It's often said that education is a fundamental part of fighting poverty. But, what happens in countries where much of the population lives in isolated communities far from local schools? Al Jazeera's David Mercer joined one student in rural Guatemala on his journey to school. - Subscribe to our channel: http://aje.io/AJSubscribe - Follow us on Twitter: https://twitter.com/AJEnglish - Find us on …	0.0359963	2016-08-30T10:52:52.000Z	0.051139604000000005	0.074959025	0.020758633000000002	africa	africa	1
307	qg6R8QDU7Ss	The Stream - Tracking tech: Connected and vulnerable?	Follow The Stream and join Al Jazeera’s social media community: This episode’s story: http://stream.aljazeera.com/story/201601181355-0025134 FACEBOOK: http://www.facebook.com/AJStream TWITTER: https://twitter.com/AJStream GOOGLE+: http://google.com/+TheStream **************************************************** On The Stream: As the Internet of Things becomes more pervasive, privacy and security …	0.0360435	2016-01-20T13:44:55.000Z	0.015798786999999998	0.030922048	0.051529642	africa	africa	1
308	VFyzLQszMZ0	Cambodia opposition rally urges poll probe	Thousands of Cambodians, many holding lotus flowers symbolising peace, have joined a mass protest in the capital Phnom Penh in a last-ditch bid to challenge the prime minister's disputed election win. Demonstrators on Saturday rallied against the contested poll win by Hun Sen's long-ruling Cambodian People's Party (CPP), aware that the final results due on Sunday will effectively close the opposi…	0.036167	2013-09-08T17:10:26.000Z	0.036167007	0.08971467	0.031802796	politics	politics	13
309	jVEuHED4tOo	Kenya prepares for 50th anniversary celebration	Kenya is preparing to celebrate its fifty anniversary since gaining independence. It has been one of the most stable countries in the region, because of the unique role played by aid agencies and the UN. Al Jazeera's Peter Greste reports from Nairobi.	0.0361737	2013-12-12T15:22:34.000Z	0.036173675	0.028597697999999998	0.0069818874	africa	africa	1
310	qiHNPLkfsAc	Correspondent - Andy Gallacher promo	Subscribe to our channel http://bit.ly/AJSubscribe Correspondent - Andy Gallacher promo	0.036195	2013-08-01T02:46:07.000Z	0.054498135999999996	0.012774259	0.01747487	media	media	11
311	P6xiGgvt12M	Families lead search for Mexico's missing	The case of Mexico's 43 missing students has drawn attention to the thousands of others who have gone missing in the country, many of whom the government has done little to find. Authorities have failed to set up a basic workable database to keep track of forensic evidence, forcing families of the missing to launch a new online DNA database to help the search efforts. Al Jazeera's Adam Raney repo…	0.0362201	2014-11-21T02:50:38.000Z	0.036220092	0.13198429999999994	0.023676902000000003	latin america	latin america	10
312	qgKG9WgW6QY	Doctors on Bikes riding the way for Lesotho	Poor roads, long distances and poverty often prevent patients in Lesotho from getting access to adequate healthcare. Now medical professionals are travelling to their patients on motorbikes. Al Jazeera's Haru Mutasa reports from Maseru.	0.0362219	2012-08-06T14:27:49.000Z	0.07668649400000001	0.07924838	0.13468532	africa	africa	1
313	Okud2WW_MOE	'Decolonising' South African universities - Highlights	Subscribe to our channel http://bit.ly/AJSubscribe The Stream speaks to students about South Africa's 'Rhodes Must Fall' movement. For more, watch the full episode: http://bit.ly/1ILcn7I At Al Jazeera English, we focus on people and events that affect people's lives. We bring topics to light that often go under-reported, listening to all sides of the story and giving a 'voice to the voiceless.' R…	0.0363714	2015-04-10T01:23:07.000Z	0.03637137	0.031051073	0.009351161	africa	africa	1
314	uUaRIcHhaP0	Programmes - May 2017 promo	- Subscribe to our channel: http://aje.io/AJSubscribe - Follow us on Twitter: https://twitter.com/AJEnglish - Find us on Facebook: https://www.facebook.com/aljazeera - Check our website: http://www.aljazeera.com/	0.0364057	2017-05-18T13:26:40.000Z	0.03640573	0.038735557000000004	0.0071871737	media	media	11
315	1wDLZ5GigFA	The Stream - Juveniles and life without parole	Follow The Stream and join Al Jazeera’s social media community: This episode’s story: http://stream.aljazeera.com/story/201704100351-0025414 FACEBOOK: http://www.facebook.com/AJStream TWITTER: https://twitter.com/AJStream GOOGLE+: http://google.com/+TheStream **************************************************** On The Stream: Sentencing juveniles to life in prison without parole in the United Sta…	0.0364057	2017-04-11T11:52:48.000Z	0.03640573	0.11830291	0.26790473	science & technology	science & technology	17
316	vDN5c7LTb94	Bomb-rigged homes delay return of Iraqi residents near Mosul	Bomb-rigged homes delay return of Iraqi residents near Mosul. More than 300,000 people have been displaced from their homes since the Iraqi military offensive began to push ISIL out of Mosul, the group's last stronghold in Iraq. But the armed group has left behind countless mines and booby-traps in the areas it once occupied. It’s an enormous challenge to clear these areas and make them safe for …	0.0364057	2017-03-20T19:50:39.000Z	0.03640573	0.64452356	0.14702067	battle for mosul	war & conflict	20
317	g9i2YOf7F20	Panama Papers: El Salvador raids Mossack Fonseca office	Authorities in El Salvador have raided the local offices of law firm Mossack Fonseca and seized documents and equipment, according to the office of the country's attorney general. The Panama-based law firm is at the centre of an international data leak scandal - dubbed the Panama Papers - that has embarrassed several world leaders and highlighted the shadowy world of offshore companies. Al Jazeer…	0.0364057	2016-04-09T12:19:08.000Z	0.03640573	0.14967416	0.03724355	politics	politics	13
318	ZVqGd4_Ia_4	#AJStream leads 06/17/2015 - Nigerians say #UndressNASS; Peru’s #EsDeGay campaign	Subscribe to our channel http://bit.ly/AJSubscribe Title: Stream leads 6/17/2015: Nigerians say #UndressNASS; Peru’s #EsDeGay campaign Story: Nigerians say #UndressNASS over alleged $43 million Wardrobe Allowance Link: http://stream.aljazeera.com/story/201506172030-0024830 Story: Peru radio show At Al Jazeera English, we focus on people and events that affect people's lives. We bring topics to li…	0.0364057	2015-06-18T00:39:26.000Z	0.03640573	0.23754409	0.011859729	media	media	11
319	XZQcTp545ZI	Techknow - Earthquake Warning promo	Caltech's Early Earthquake Warning System and new gun safety features.	0.0364057	2015-06-11T08:35:03.000Z	0.03640573	0.18168345	0.058494296	united states	us & canada	19
320	r09bADPshQU	Inside Story - Putting the GCC house in order	Leaders of the Gulf Cooperation Council countries will meet in the Qatari capital on Tuesday for a summit being held after months of tension between its members. Saudi Arabia, the United Arab Emirates and Bahrain withdrew their ambassadors from Doha last year, accusing Qatar of interfering in their domestic affairs and supporting so-called Islamist groups like the Muslim Brotherhood. A summit in …	0.0364057	2014-12-09T03:26:21.000Z	0.03640573	0.044541265999999996	0.0067171776	gcc	middle east	12
321	mgmnv1VsAzs	Yemen rebels reject new prime minister	The Houthi rebels in Yemen have told Al Jazeera they reject the appointment of a new prime minister by the president. Yemen's official news agency earlier said that Ahmed Awad Bin Mubarak had been named for the job. Al Jazeera's Mohamed Vall reports from Sanaa. Subscribe to our channel http://bit.ly/AJSubscribe Follow us on Twitter https://twitter.com/AJEnglish Find us on Facebook https://www.fac…	0.0364057	2014-10-08T03:08:37.000Z	0.03640573	0.24416654	0.06261175	middle east	middle east	12
322	e6g8bnG4Pas	Fault Lines - Earthquake State promo	Fault Lines travels to Oklahoma, where earthquakes are a daily occurrence, to witness the human consequences, and find out what – or who – is to blame. - Subscribe to our channel: http://bit.ly/AJSubscribe - Follow us on Twitter: https://twitter.com/AJEnglish - Find us on Facebook: https://www.facebook.com/aljazeera - Check out our website: http://www.aljazeera.com/	0.0364058	2015-12-09T11:52:33.000Z	0.036405765	0.111544855	0.09391573	donald trump	us & canada	19
323	grcIErx-6TQ	August Highlights 2015 - Version 2 promo	Highlights of news and documentaries on Al Jazeera in August.	0.0364058	2015-07-29T09:13:11.000Z	0.036405765	0.017711129	0.006109189	africa	africa	1
324	Q6ZhB7TJzvk	Counting the Cost - Business and Economics promo	A look at the world's top business and economics stories that has impacted 2015. - Subscribe to our channel: http://bit.ly/AJSubscribe - Follow us on Twitter: https://twitter.com/AJEnglish - Find us on Facebook: https://www.facebook.com/aljazeera - Check out our website: http://www.aljazeera.com/	0.0364059	2015-12-23T11:42:55.000Z	0.036405902000000004	0.026768913	0.0072210706000000015	business & economy	business & economy	4
325	SNxNPgrbYos	Empire - Generic Aug 2013 promo	Subscribe to our channel http://bit.ly/AJSubscribe Marwan Bishara and guests analyse global powers and their agendas.	0.0364059	2013-08-16T14:54:37.000Z	0.036405902000000004	0.052899577	0.021383038	media	media	11
326	Oq9HeNLMgco	Wind energy to meet Pakistan's power shortfall	In a country where long outages are very common due to massive electricity shortage in the country, the government is trying to look at alternate sources of energy. A 160 km long wind corridor is proving to be a new energy hub with dozens of companies including those from other countries like China are planning to develop wind farms to meet Pakistan's energy requirement. Nicole Johnston reports f…	0.0366287	2014-12-08T20:14:08.000Z	0.013892409	0.04734281	0.014790676	asia	asia	3
327	vsMSJj9Ve-U	Peru's election: Media, money and manipulation - The Listening Post (Full)	On The Listening Post this week: Corruption and cover-ups - covering the elections in Peru. Plus, war and peace: Colombia's unreconciled narratives. Peru's election: Media, money and manipulation. Peruvians head to the polls this week in a presidential election that's been marred by allegations of money laundering and media manipulation. We analyse the coverage, Peru's powerful media conglomerate…	0.0366346	2016-06-07T13:40:17.000Z	0.03663455	0.2368327000000001	0.15708996	africa	africa	1
328	PCQEzhWXs6U	Head to Head - Dr Mowaffak al-Rubaie – Will ISIL put an end to Iraq? promo	Subscribe to our channel http://bit.ly/AJSubscribe Mehdi Hasan challenges Mowaffak al-Rubaie, Iraq’s former National Security Advisor and Maliki aide, on who is to blame for the rise of ISIL and the world’s response to its threat. Forced into exile by Saddam Hussein’s regime, al-Rubaie returned to Iraq following the 2003 invasion, and played a pivotal role in shaping the nation’s politics. With t…	0.0366362	2014-11-23T23:55:39.000Z	0.03663621	0.21139663	0.10121083	iraq	middle east	12
329	eQbXjCzdQYA	101 East - India’s Child Geniuses promo	- Subscribe to our channel: http://aje.io/AJSubscribe - Follow us on Twitter: https://twitter.com/AJEnglish - Find us on Facebook: https://www.facebook.com/aljazeera - Check our website: http://www.aljazeera.com/	0.0367659	2017-05-28T11:10:12.000Z	0.026357407000000003	0.13613787	0.0071871737	india	asia	3
330	OPlyM0hdY74	Inside Story - Will elections change the course of Iranian politics?	Elections in Iran pits powerful conservative elements in Iranian politics against their reformist rivals. Presenter: Adrian Finighan Guests: Hamid Reza Gholamzadeh - Editor in Chief of Mehr News Agency Ellie Geranmayeh - Middle East and North Africa Fellow at the European Council of Foreign Affairs Mohammad Shabani - Iran Pulse Editor at Al Monitor - Subscribe to our channel: http://bit.ly/AJSubs…	0.0369234	2016-02-27T09:55:16.000Z	0.036923353	0.056570075	0.011371967	iran	middle east	12
331	U3tga2YKBAM	Talk to Al Jazeera - Former Guatemalan president: I never acted illegally	We speak to Otto Perez Molina at a military prison as he waits to find out if he'll stand trial on corruption charges. - Subscribe to our channel: http://bit.ly/AJSubscribe - Follow us on Twitter: https://twitter.com/AJEnglish - Find us on Facebook: https://www.facebook.com/aljazeera - Check out our website: http://www.aljazeera.com/	0.0370841	2016-06-15T18:18:08.000Z	0.037084083999999996	0.19802237	0.12883487	politics	politics	13
332	VH3JUqBMek4	China's president completes EU tour	China's President Xi Jinping has met the Prime Minister of Belgium, on the last leg of a four-nation European tour. He's pushing for deeper political and economic ties with the European Union. Al Jazeera's Phil Lavelle reports from Bruge.	0.037094	2014-04-02T13:03:14.000Z	0.037093982000000005	0.06630696	0.046860572	business & economy	business & economy	4
333	_TJFGZQC6Ec	Yemen military seizes Al-Qaeda strongholds	The US plays an active role in Yemen where it has stepped up its drone attacks Al Qaeda has (had) on many times (occasions vowed) promised to hit back. As a precautionary measure the US has shut it's embassy in the capital, Sanaa. Al Jazeera's Hashem Ahelberra reports.	0.0371024	2014-05-08T17:19:53.000Z	0.03710236	0.38690802	0.20268229	middle east	middle east	12
334	rLgtgtDzy-8	Innovate Africa - Entertainment promo	Subscribe to our channel http://bit.ly/AJSubscribe Today on Innovate Africa - local heroes take over gaming, take on politics in TV satire and take African music top the online world.	0.0371338	2014-12-14T15:14:48.000Z	0.037133757	0.019990748	0.06970141	africa	africa	1
335	5z4zQ8gXz5M	South Korea's Hanjin Group offers $90m to rescue shipping unit	South Korea's Hanjin Group says it would provide its debt-ridden shipping unit with $90.4m to help ease huge disruptions to global maritime freight. As the world's seventh largest shipping company, it is seeking bankruptcy protection at home and in the US after creditors rejected its latest plan to deal with a $5.37b debt. Al Jazeera's Harry Fawcett reports from Seoul. - Subscribe to our channel:…	0.0372551	2016-09-08T01:12:47.000Z	0.037255112	0.011540685	0.02214815	asia pacific	asia	3
336	5_9RbRqi2z0	News: First World War Centenary promo	Subscribe to our channel http://bit.ly/AJSubscribe Al Jazeera's coverage of a 100 years since the start of the first world war.	0.0372705	2014-07-29T18:57:53.000Z	0.037270463999999996	0.123068444	0.036854967	media	media	11
337	JQYCp-GLAdE	India braces for rise in pneumonia cases	Winter is approaching in India and that usually means an increase in the number of pneumonia cases. Pneumonia is the number one killer of Indian children under the age of five. About 300,000 children die every year from the disease. Al Jazeera's Nidhi Dutt reports from New Delhi.	0.0372747	2014-11-16T10:57:24.000Z	0.037274707000000004	0.23622511	0.13381235	asia	asia	3
338	oeQ4bjUM2WY	Balloonists complete record flight across Pacific	After a week long flight across the Pacific from Japan a gas-filled balloon has landed off the shore of Mexico's Baja Penninsula. The pilots, one American and one Russian, claim they broke two world records.Al Jazeera's John Holman reports. Subscribe to our channel http://bit.ly/AJSubscribe Follow us on Twitter https://twitter.com/AJEnglish Find us on Facebook https://www.facebook.com/aljazeera C…	0.0373546	2015-02-01T19:07:21.000Z	0.037354644	0.06383568	0.059435118	asia pacific	asia	3
339	oLLnFTRjur4	101 East - Hong Kong: Aged & Abandoned promo	Hong Kong is one of the world’s wealthiest cities, so why are thousands of elderly residents collecting rubbish to survive? More from 101 East on: YouTube - http://aje.io/101eastYT Facebook - http://facebook.com/101east Twitter - http://twitter.com/aj101east Instagram - http://instagram.com/aj101east Website - http://aljazeera.com/101east	0.0374472	2016-05-02T07:29:32.000Z	0.039173435	0.058491066	0.30552825	middle east	middle east	12
340	l_2kQj5oPnM	UpFront - January 2016 promo	With the thrust and parry of rigorous debate, Mehdi Hasan cuts through the headlines to challenge conventional wisdom, highlight contradictions and uncover double standards. - Subscribe to our channel: http://bit.ly/AJSubscribe - Follow us on Twitter: https://twitter.com/AJEnglish - Find us on Facebook: https://www.facebook.com/aljazeera - Check out our website: http://www.aljazeera.com/	0.0374967	2016-01-15T00:46:37.000Z	0.052417424000000004	0.03477442	0.047995385	united states	us & canada	19
341	uRP0l6SxgQk	Al Jazeera Correspondent - Metropolis: A Timelapse Perspective promo	Subscribe to our channel http://bit.ly/AJSubscribe A creative and personal look at the architecture that surrounds us and what the structures say about our relationship with our modern cities.	0.0375117	2014-11-05T17:55:35.000Z	0.049881164000000006	0.09333001	0.02393718	united states	us & canada	19
342	BWcezCDqSCo	Goal-line technology set for debut	Subscribe to our channel http://bit.ly/AJSubscribe Hundreds of millions of football fans will be following the action when the new English Premier League season kicks off. The difference this season is that the league becomes the first in the world to use goal line technology. Al Jazeera's Lee Wellings reports from London. Visit Al Jazeera's sports page for more: http://www.aljazeera.com/sport/	0.0375555	2013-08-16T00:57:44.000Z	0.037555486	0.00797575	0.014717836000000003	europe	europe	6
343	yyLlPxZty4g	Las Vegas pins hopes on boxing 'fight of the century'	It is expected to be the most watched fight in years. Thousands of fans are arriving in Las Vegas to watch Floyd Mayweather and Manny Pacquiao finally face each other. But what about the economic impact on a city that was hit hard by the financial crisis? Al Jazeera's Andy Gallacher reports from Las Vegas, Nevada.	0.037605	2015-05-02T03:02:19.000Z	0.056519117	0.109556355	0.025523867	europe	europe	6
344	HvRsrbkLcjM	CAR in grip of fear and violence	The new interim president of the Central African Republic, Catherine Samba-Panza, has pledged to end the religious violence that threatens to tear the country apart. But she says she needs the help of the international community to help stabilise her country, as UN officials warn that tensions threaten to cross the tipping-point into 'all-out sectarian conflict'. The fear and violence is spreadin…	0.0378409	2014-01-22T06:30:14.000Z	0.037840884	0.23053743	0.07271822	africa	africa	1
345	0-V8pDUWQq0	Nilanjan Mukhopadhyay discusses BJP's defeat in Bihar	Nilanjan Mukhopadhyay, author of 'Narendra Modi: The Man, The Times' talks about India's ruling party's defeat, the BJP, in the key state of Bihar.	0.0379535	2015-11-09T10:19:01.000Z	0.03795348		0.034754008	asia	asia	3
346	46KDGS0xqAw	Fate of UN aid route to Syria up in the air	Since December 17, the United Nations has been running aid flights into Syria from northern Iraq. The flights have provided a lifeline to some of the four million internally displaced people still trapped in the war-torn country. But these flights are about to come to an end if political leaders from Damascus as well as the Iraqi and Kurdish governments cannot reach a political deal. Al Jazeera's…	0.037991	2013-12-30T17:34:49.000Z	0.037991006	0.21848132	0.04586425	iraq	middle east	12
347	HOAJXcklSIg	Head to Head - Tom Friedman promo	Subscribe to our channel http://bit.ly/AJSubscribe Mehdi Hasan challenges super-star columnist Tom Friedman of the New York Times, at the Oxford Union, on whether America is a force for good in the world.At Al Jazeera English, we focus on people and events that affect people's lives. We bring topics to light that often go under-reported, listening to all sides of the story and giving a 'voice to …	0.0380893	2014-06-13T09:16:10.000Z	0.03808927	0.19309182	0.012310493	media	media	11
348	xg8Lv001GFQ	Iranian-American Azima under investigation for UAE arms deal	The FBI is investigating an Iranian-born US businessman Farhad Azima for corrupt global practices. The Associated Press has named the Kansas City resident Azima as the target of an investigation. The AP also cited documents that indicate journalist Jay Solomon acted as an intermediary in discussing an arms deal between Azima and the UAE. Al Jazeera’s Mike Hanna reports from Washington, DC - Subsc…	0.0381108	2017-06-23T16:05:47.000Z	0.03811083	0.1285169	0.07713591	iran	middle east	12
349	2vYbKtWSfaI	Al Jazeera Correspondent - Metropolis: A Time Lapse Perspective	Subscribe to our channel http://bit.ly/AJSubscribe A creative exploration of architecture and human relationships with modern cities. Richard Bentley has a love for buildings and believes they are a living part of our cities and cultures. But he wonders how much we really see the great structures surrounding us as we move through our modern spaces. For three years, he has been a time lapse photog…	0.0383552	2016-01-07T14:32:16.000Z	0.02894053	0.13397421	0.006571574	middle east	middle east	12
350	QBEO8h_FPOI	South2North - The refugees within the refugees	Subscribe to our channel http://bit.ly/AJSubscribe In March 2013, Bushra a 19-year-old Syrian mother of two, walked into a refugee camp in Tripoli, Lebanon. She symbolically became the one millionth refugee to flee Syria's devastating civil war. Both sides of the conflict now stand accused of international human rights violations. The UN warns of an unfolding humanitarian disaster. But behind the…	0.0384023	2013-04-06T16:39:35.000Z	0.038402297	0.16069528	0.045088302	refugees	war & conflict	20
351	3ZYyNXbVb8w	Afghan basketball team beats odds to aim high	A team of athletes from Afghanistan is in Italy to take part in an international basketball competition. Getting there has been a major challenge for the players, many of whom had never left their war-torn country. The players have overcome war and disabilities to find new purpose in life, while boosting the sport in their country. Al Jazeera's Claudio Lavanga reports from Cantu in northern Italy.	0.038594	2014-05-31T02:40:27.000Z	0.038593962999999995	0.049899905999999994	0.09250293	afghanistan	middle east	12
352	loUhpEm-0wQ	Gulf countries invest billions in renewable energy	Gulf countries are investing billions of dollars in renewable energy resources. Qatar has built the largest solar technology manufacturing facility in the region. Qatar, one of the world's top natural gas producers, plans to convert two percent of its power output to renewable sources by 2020. Environmentalists say it is a step in the right direction but tangible progress is still many years away…	0.0386282	2014-06-09T18:22:42.000Z	0.03862816	0.03042487	0.034139946000000004	gcc	middle east	12
353	i0WxsPW5YpE	Haiti postpones presidential election as violence erupts	Violence has erupted on the streets of Haiti's capital for a second day. Protesters are demanding the President step down, after the poll to choose a new leader was postponed again. Al Jazeera's Andy Gallacher reports from Port-Au-Prince. Subscribe to our channel http://bit.ly/AJSubscribe Follow us on Twitter https://twitter.com/AJEnglish Find us on Facebook https://www.facebook.com/aljazeera Che…	0.0386324	2016-01-25T00:13:18.000Z	0.03863243	0.23754409	0.17620914	africa	africa	1
354	oXLfxRxAZZg	What’s the importance of Fallujah?	Recapturing Fallujah gives Iraqi forces control of the most populated areas along the Euphrates river, as well as surrounding farmland west of Baghdad. Fallujah is predominantly Sunni Muslim, and many people in the city supported former president Saddam Hussein against the US military invasion. Al Jazeera’s Caroline Malone reports. - Subscribe to our channel: http://aje.io/AJSubscribe - Follow us…	0.0387803	2016-06-27T07:50:12.000Z	0.038780298	0.03043086	0.004550576	iraq	middle east	12
355	VV-ko8xbiZE	The Cure - Episode 8 - Mending Minds: Part 2	Subscribe to our channel http://bit.ly/AJSubscribe Subscribe to our channel http://bit.ly/AJSubscribe Liberian Dr Janice Cooper, a Harvard-trained expert in mental health, is spearheading a project run by US charity The Carter Center to train 150 nurses and physician assistants in mental health by 2015. Since the project started in 2010, 100 clinicians have been trained, and all 15 of the West Af…	0.0388098	2013-08-28T12:00:53.000Z	0.03880978	0.046212357	0.007980477	health	health	7
356	87hNxtibDNU	Al Jazeera Correspondent - Promo: A new season	Subscribe to our channel http://bit.ly/AJSubscribe Al Jazeera correspondents take us on their personal journeys of discovery, showing the insights, passion and experience, exploring the events and issues that have marked their lives and careers. At Al Jazeera English, we focus on people and events that affect people's lives. We bring topics to light that often go under-reported, listening to all …	0.0388321	2012-10-08T10:32:44.000Z	0.03883213	0.023694284	0.010705285	europe	europe	6
357	8V551BSL4_M	NewsGrid: Al Jazeera's interactive news hour	As Al Jazeera's first interactive news hour, NewsGrid gives you the opportunity to engage with the world's news stories on and off the grid. #AJNewsGrid	0.0388668	2016-12-01T21:32:09.000Z	0.05209076	0.046107553	0.052059144	europe	europe	6
358	l33pcR2L_c4	Al Jazeera's correspondents report from across Pakistan	Subscribe to our channel http://bit.ly/AJSubscribe Subscribe to our channel http://bit.ly/AJSubscribe Al Jazeera's correspondents across Pakistan report on the latest in Pakistan's elections. Mike Hanna reports from the capital Islamabad, Imtiaz Tyab reports from Lahore and Kamal Hyder reports from Peshawar. At Al Jazeera English, we focus on people and events that affect people's lives. We bring…	0.0390444	2013-05-21T15:39:39.000Z	0.039044414	0.05587801	0.008115470999999999	asia	asia	3
359	NNopiWT8E4g	The Cure - Safe Surgery Innovations in Uganda	A three-minute checklist, a simple device to measure oxygen in patients' blood, and a drill cover are improving surgery. Subscribe to our channel http://bit.ly/AJSubscribe Follow us on Twitter https://twitter.com/AJEnglish Find us on Facebook https://www.facebook.com/aljazeera Check our website: http://www.aljazeera.com/	0.0390623	2016-02-15T12:34:54.000Z	0.089529365	0.03524052	0.057195235	africa	africa	1
360	iOIojofAMP0	South2North - The right to health	Subscribe to our channel http://bit.ly/AJSubscribe This week on South2North Redi looks at how three developing countries are tackling different problems in their healthcare systems.At Al Jazeera English, we focus on people and events that affect people's lives. We bring topics to light that often go under-reported, listening to all sides of the story and giving a 'voice to the voiceless.' Reachin…	0.0391139	2013-09-17T00:00:03.000Z	0.03266839	0.1115413	0.008967478000000001	media	media	11
361	LUZ9DnWwhJ0	Pricey tickets shut out many World Cup fans	Argentina's football stars kick off their World Cup campaign in the Brazilian city of Rio de Janeiro. Some of the fans who cannot afford a ticket to the big game have organised their own, in one of the city's notorious favelas. Far away from the stadiums, the slum dwellers try to recreate the rivalry between Argentina and Brazil, while showing their passion for the sport. Al Jazeera's Lucia Newma…	0.0391314	2014-06-15T17:31:40.000Z	0.039131402999999995	0.34747687	0.20931157	latin america	latin america	10
362	7SXW8SxJrPA	US looks at reducing drug sentences	The top law officer of the United States is backing a proposal to cut jail terms for people caught dealing drugs. Attorney General Eric Holder believes it will help both socially and financially, but not everybody agrees. Al Jazeera's Alan Fisher reports from Washington DC.	0.0392001	2014-03-14T02:26:53.000Z	0.039200122999999996	0.27568590000000004	0.11413648	united states	us & canada	19
363	Kv69MYxXlds	Al Jazeera World - Libya's Forgotten King promo	The story of Idris the First who ruled Libya before Gaddafi, the rise to power of the Senussi order and events leading up to his crowning in December 1951.	0.0393687	2015-11-19T09:17:34.000Z	0.039368674	0.1087456	0.013025966000000002	libya	africa	1
364	42oH8fIiRqk	Valentino's Ghost - promo	“Valentino’s Ghost” exposes how America’s foreign policy agenda in the Middle East drives the U.S. media’s portrayals of Arabs and Muslims.	0.0394282	2016-03-20T20:20:11.000Z	0.039428234	0.23754409	0.1194989	latin america	latin america	10
365	m3Wy1NgqTPo	#Yosoy132: Franc Contreras Correspondent	Description : Drug violence is raging in key parts of Mexico, poverty is wide-spread and young people have few options for their future. Now many are concerned their country's main television channels are trying to skew the outcome of the July 1 presidential election. They are fed up and have started youth movement called #YoSoy132, which aims to fundamentally change Mexico's political culture. O…	0.0396046	2012-06-12T19:51:27.000Z	0.06000884	0.11230112	0.13158146	latin america	latin america	10
366	zvmESuDWPwM	People & Power - El Salvador: Quest for Justice	More than 20 years after the end of El Salvador's brutal civil war, its legacy of pain and misery still lingers. Until now, an amnesty has shielded from prosecution those suspected of atrocities. But the discovery of a secret directory of death squad targets has given campainers hope that the guilty can at last be held accountable. On this edition of People & Power, we investigate how evidence of…	0.0396453	2017-03-21T02:51:10.000Z	0.03511946	0.015461265	0.082030885	human rights	human rights	8
367	tqklbXMZn1k	Andrew McCabe: 'Comey enjoyed broad support within the FBI’	Andrew McCabe, acting FBI director, has disputed the White House's assertion that James Comey was fired in part because he had lost the confidence of the FBI's rank-and-file. US President Donald Trump fired Comey, the former FBI head, saying he had left the domestic intelligence and security service in “virtual turmoil”. Al Jazeera’s James Bays reports from Washington, DC. - Subscribe to our chan…	0.0397364	2017-05-12T17:57:56.000Z	0.04943545	0.010984619	0.19563511	donald trump	us & canada	19
368	W6CgPxSXE8o	Kosovo re-runs poll amid tight security	NATO soldiers and EU police secured polling stations in the Kosovo town of Mitrovica as an election central to a Western-sponsored plan to end the country's ethnic partition took place.	0.0397758	2013-11-18T15:02:21.000Z	0.039775793	0.11687772	0.05531073	africa	africa	1
369	NTqlu-SsTE8	The Cure - Episode 1: Precision Radiotherapy	Subscribe to our channel http://bit.ly/AJSubscribe Subscribe to our channel http://bit.ly/AJSubscribe Treatment times for cancer patients undergoing radiotherapy have been reduced by up to a fifth as a result of revolutionary beam-shaping technology. At Al Jazeera English, we focus on people and events that affect people's lives. We bring topics to light that often go under-reported, listening to…	0.039875	2013-05-29T14:30:41.000Z	0.030570617	0.023200095	0.025074441	media	media	11
370	EqMr_L7lltU	Witness - Money in Minutes promo	Subscribe to our channel http://bit.ly/AJSubscribe Migrants workers around the globe send money home to support their families, but there is a dark side to international cash transfers	0.0398858	2014-08-10T11:52:58.000Z	0.016655223	0.10365275	0.110720776	united states	us & canada	19
371	Zf3t3rOs_nU	Fans mourn death of Mexico’s music legend Juan Gabriel	Legendary Mexican singer and songwriter Juan Gabriel has died at 66. His ballads of love and heartbreak transformed him into Mexico’s biggest-selling artist, with reported sales of more than a 100 million albums. His fame spread far beyond his native Mexico and Latin America to Spain and the US. Al Jazeera’s Mereana Hond reports. - Subscribe to our channel: http://aje.io/AJSubscribe - Follow us o…	0.0399292	2016-08-29T23:25:58.000Z	0.05285631	0.3843131	0.04723475	latin america	latin america	10
372	_8L301E1dsA	Al Jazeera World - A Somali In America promo	- Subscribe to our channel: http://aje.io/AJSubscribe - Follow us on Twitter: https://twitter.com/AJEnglish - Find us on Facebook: https://www.facebook.com/aljazeera - Check our website: http://www.aljazeera.com/	0.0400203	2017-03-22T10:02:13.000Z	0.021299683	0.22636062	0.0071871737	united states	us & canada	19
373	U_6ig8SlQv4	Chile astronomers discover one of the oldest stars	It is 13 billion years old and shines by our milky way. And as astronomers in Chile have discovered, it is one of the oldest stars in the universe. Al Jazeera's Nick Clark reports from the Atacama desert in Chile.	0.0401589	2014-05-10T06:03:49.000Z	0.07001486400000001	0.017660422	0.007566397	politics	politics	13
374	kkV3DKtdPzA	Spread of cholera puts strain on South Sudan	South Sudan's cholera epidemic is still spreading, with 37 deaths and more than 1,700 reported cases since the outbreak in May. Al Jazeera's Anita McNaught reports from Juba.	0.0401795	2014-06-17T21:06:38.000Z	0.040179543	0.16098309	0.039811626	africa	africa	1
375	5PSoPOP_tT0	Are the US media addicted to election polls? - The Mediator	The Listening Post's Richard Gizbert on reporting the race for the White House. Like The Listening Post on Facebook: https://facebook.com/AJListeningPost More from The Listening Post: http://aje.io/ls2n Subscribe to our channel http://bit.ly/AJSubscribe Follow us on Twitter https://twitter.com/AJEnglish Find us on Facebook https://www.facebook.com/aljazeera Check our website: http://www.aljazeera…	0.0402205	2016-11-06T16:41:07.000Z	0.047730085	0.035471503	0.0376576	africa	africa	1
376	y9zeDkrnz7E	Philippines satellite to watch out for dangerous weather	In a Phillippines first -a satellite has been sent into space to keep an eye on potentially devastating weather patterns. It is the first to be assembled and developed by Filipinos. The satellite is being flown to the International Space Station by the private space company Orbital. Al Jazeera's Sohail Rahman reports from Manila. - Subscribe to our channel http://bit.ly/AJSubscribe - Follow us on…	0.0403303	2016-04-02T13:08:23.000Z	0.056603096	0.086091705	0.043753818	europe	europe	6
377	GcpbxHaer0c	News Bulletin - 03:35 GMT update	Subscribe to our channel http://bit.ly/AJSubscribe The main headlines on Al Jazeera English, featuring the latest news and reports from around the world. Subscribe to our channel http://bit.ly/AJSubscribe Follow us on Twitter https://twitter.com/AJEnglish Find us on Facebook https://www.facebook.com/al... Check our website http://www.aljazeera.com/	0.0404626	2014-12-18T04:06:56.000Z	0.040462557	0.029683005	0.022054967	media	media	11
378	zSFeGCqGmSA	News Bulletin - 14:35 GMT update	Subscribe to our channel http://bit.ly/AJSubscribe The main headlines on Al Jazeera English, featuring the latest news and reports from around the world. . Subscribe to our channel http://bit.ly/AJSubscribe Follow us on Twitter https://twitter.com/AJEnglish Find us on Facebook https://www.facebook.com/aljazeera Check our website: http://www.aljazeera.com/	0.0405239	2014-05-04T18:01:20.000Z	0.040523887	0.029683022000000007	0.020709282	media	media	11
379	J0LzY_xGu_A	Cold weather snap kills dozens in Eastern Asia	Dozens have died as a band of severe cold weather swept across Japan and other eastern countries. Transport services ground to a halt and businesses were forced to close their doors as temperatures dropped to their lowest for half a century. Al Jazeera's Rob Matheson reports. - Subscribe to our channel http://bit.ly/AJSubscribe - Follow us on Twitter https://twitter.com/AJEnglish - Find us on Fac…	0.0405365	2016-02-01T08:55:34.000Z	0.052104313	0.4960439	0.099641986	europe	europe	6
380	KKZDsqnYYAg	'Philomena' inspiration meets Pope Francis	The Irish woman who inspired the Oscar-nominated film 'Philomeena' about a mother forced to give up her son for adoption says she doesn't blame the Vatican. That's despite a damning UN report blaming the Catholic Church for such practices. Claudio Lavanga reports from Rome.	0.0406191	2014-02-10T14:25:25.000Z	0.040619063999999996	0.07522431	0.11225143	arts & culture	arts & culture	2
381	E0ozGnMfYNI	Inside Story - Marching for climate change	- Subscribe to our channel http://bit.ly/AJSubscribe - Follow us on Twitter https://twitter.com/AJEnglish - Find us on Facebook https://www.facebook.com/aljazeera - Check out our website:http://www.aljazeera.com/	0.0406624	2014-09-22T20:54:29.000Z	0.040662427	0.025397915	0.01082921	media	media	11
382	1Vqp3mq-za4	Witness - The Photographer from Riga promo	Subscribe to our channel http://bit.ly/AJSubscribe The personal story of renowned photographer Inta Ruka and her stunning portraits of ordinary Latvians reflect 30 years of Latvia's modern history	0.0406803	2014-12-03T22:02:51.000Z	0.040680345	0.033132043	0.0084115425	media	media	11
383	EN2PaTYyn9c	earthrise - A breath of Fresh Air	Murals with the pollution-cleansing power of up to 8,000 trees could help clean up one of Manila's busiest highways.	0.0407155	2013-08-01T17:28:46.000Z	0.04571001	0.30124757	0.10572868	africa	africa	1
384	d_G7ybvWI6I	Lahore Literary Festival kicks off despite security threats	Authors, artists and poets from 40 countries are defying security threats to take part in a literary festival in Pakistan. Organizers in Lahore, who were forced to change the venue at the last minute due to a security alert, say the event is to defy an environment of fear. Al Jazeera's Osama Bin Javaid reports from Lahore. Subscribe to our channel http://bit.ly/AJSubscribe Follow us on Twitter ht…	0.0408526	2016-02-21T22:59:03.000Z	0.04085263	0.3889421	0.055205047	pakistan	asia	3
385	33V5v9ebMIs	Malaysia's HIV-positive orphans struggle to get adopted	Malaysia's HIV-positive orphans face hardship in being adopted because the stigma surrounding AIDS and HIV is rarely discussed within the country's deeply religious communities. Al Jazeera's Sohail Rahman reports on one woman who is hoping to change attitudes. Subscribe to our channel http://bit.ly/AJSubscribe Follow us on Twitter https://twitter.com/AJEnglish Find us on Facebook https://www.face…	0.0409052	2015-12-02T06:47:35.000Z	0.0064419685	0.30572143	0.12910853	africa	africa	1
386	FlUJlX7ha74	UN-brokered talks could lead to ceasefire in Yemen	A Yemeni government official says a new round of UN-brokered talks could be held by the end of this month. Those negotiations could lead to a ceasefire. Last week, the country's warring parties met UN envoy Ismail Ould Cheikh Ahmed. Al Jazeera's Hashem Ahelbarra reports. Subscribe to our channel http://bit.ly/AJSubscribe Follow us on Twitter https://twitter.com/AJEnglish Find us on Facebook https…	0.0409343	2016-03-22T19:59:37.000Z	0.040934287	0.06413326	0.048953693	politics	politics	13
387	PUYyY32ZIN0	Mexico quake warning systems made affordable	Subscribe to our channel http://bit.ly/AJSubscribe Subscribe to our channel http://bit.ly/AJSubscribe Reaching more than 270 million households in over 140 countries across the globe, our viewers trust Al Jazeera English to keep them informed, inspired, and entertained. Our impartial, fact-based reporting wins worldwide praise and respect. It is our unique brand of journalism that the world has c…	0.0409372	2017-10-06T17:12:49.000Z	0.040937245	0.18486753	0.010952337	media	media	11
388	9qsfJh6ep8M	The Cure - Floating Hospital - Part 1	Subscribe to our channel http://bit.ly/AJSubscribe Subscribe to our channel http://bit.ly/AJSubscribe An estimated 16 million people in Bangladesh have a disability and most of them live in rural areas and cannot reach modern healthcare facilities. But the charity IMPACT is helping local medics treat disabilities aboard a three-deck floating hospital. At Al Jazeera English, we focus on people and…	0.0409813	2013-09-04T09:24:03.000Z	0.009445543	0.035045292	0.013509839	media	media	11
389	jXDLf4tkL5I	Scientists discuss International Space Station	Many continue to ask if the $150bn investment in the International Space Station was worth it. In these extended interviews with Robert Massey (Royal Astronomical Society) and Francisco Diego (University College London), they discuss the current and potential benefits of the world's most expensive project.	0.0409851	2013-12-10T19:26:42.000Z	0.040985066	0.0070965625	0.0031339952	united kingdom	europe	6
390	ZVieVzgpY_A	News: MH370 One Year on - promo	Subscribe to our channel http://bit.ly/AJSubscribe News coverage on the one year anniversary of the dissappearance of flight MH370. More on our website: http://aljazeera.com Follow us on Twitter: http://twitter.com/AJEngligh Subscribe to our channel: http://bit.ly/AJSubscribe Find us on Facebook: http://facebook.com/aljazeeraAt Al Jazeera English, we focus on people and events that affect people'…	0.0409947	2015-03-07T07:13:30.000Z	0.040994737	0.02216162	0.011725985	media	media	11
391	xBgpeRBNET4	African designers showcase talent in London	African Fashion week in London is showcasing the continent's brightest fashion talent, and connecting designers with key players in the industry. And it's happening at a time when African designs are increasingly being used by some of the world's top labels. Al Jazeera's Simon McGregor-Wood reports from London.	0.0410587	2014-08-17T20:07:49.000Z	0.041058738	0.033378936	0.028298564	africa	africa	1
392	R6vDNavlXUg	Witness - Following Beethoven's Ninth promo	Subscribe to our channel http://bit.ly/AJSubscribe Two centuries after it was written, Beethoven's Ninth Symphony continues to inspire struggles for freedom, survival and healing during dark times.	0.0410956	2015-04-30T15:11:14.000Z	0.041095622000000005	0.08358061	0.023192244	africa	africa	1
393	fJHXDh04yJM	News: French Parliamentary Elections promo	- Subscribe to our channel: http://aje.io/AJSubscribe - Follow us on Twitter: https://twitter.com/AJEnglish - Find us on Facebook: https://www.facebook.com/aljazeera - Check our website: http://www.aljazeera.com/	0.0411308	2017-06-06T15:37:02.000Z	0.041130815	0.016249498	0.0071871737	europe	europe	6
394	8YMm5znqhgc	Acting Lessons Google Hangout	Subscribe to our channel http://bit.ly/AJSubscribe Subscribe to our channel http://bit.ly/AJSubscribe Al Jazeera presenter Josh Rushing moderates a Google Plus hangout [26:22] and a Q&A with filmmaker Russ Finkelstein after the premiere of Viewfinder's Acting Lessons. Acting Lessons is an intimate in-depth look at the long-term impact of war and violence in Colombia. The film follows a former Col…	0.0411576	2013-01-16T23:34:23.000Z	0.06615938	0.048755966	0.05264134	media	media	11
395	c-Up-56faBA	Philippine neighbours steer storm relief	The Philippine government has been criticised for its slow response to Typhoon Haiyan, and for failing to provide aid early on to areas hard-hit by the storm almost two weeks ago. But many Asian countries helping out in Haiyan's aftermath are bringing their expertise and experience handling similar disasters to the relief effort. They hope to teach the Philippines how to execute an emergency resp…	0.0412361	2013-11-21T08:26:08.000Z	0.041236102999999996	0.121006355	0.04917587	weather	environment & weather	5
396	yitLrrz-1pg	earthrise - Solar Revolution	As the sun sets over developing countries, more than a billion people are either plunged into darkness or forced to rely on polluting light sources such as kerosene. While clean energy alternatives exist, switching to them has been slow and in Kenya, more than 80 percent of the country's 40 million inhabitants rely on kerosene, candles and torches as their main source of light. But the developmen…	0.0412666	2013-08-15T14:55:56.000Z	0.016892252	0.05889936	0.011976037	africa	africa	1
397	E-eB71cYF5A	Lifelines: The Quest for Global Health - Lifelines - Turning the tide on river blindness	Subscribe to our channel http://bit.ly/AJSubscribe Doctors in Uganda are using innovative methods of medicine distribution to treat river blindness - by training members of clans and communities to spread the word. River blindness, or onchocerciasis, is a parasitic illness that causes itching, eye disease and can lead to permanent blindness and affects over 18 million people worldwide. It is tran…	0.0413887	2013-10-01T14:29:50.000Z	0.041388699999999994	0.10419855	0.079724245	environment	environment & weather	5
398	Pfk2hosRtnQ	The dangers of reporting in Mexico	Journalists face dangers around the world every day, but Mexico has become one of the most deadly places for reporters. In the eastern state of Veracruz, 10 journalists have been murdered in just three years. The widow of the latest victim, Goyo Jimenez, insists her husband was targeted because he was working on reports into human trafficking and kidnapping. Al Jazeera's David Mercer reports from…	0.0414012	2014-02-27T19:32:42.000Z	0.041401234	0.12964569	0.11944293	latin america	latin america	10
399	TJH6UaAwOXI	Counting the Cost - 22 Nov 2013 promo	Subscribe to our channel http://bit.ly/AJSubscribe Counting the Cost provides background to the economics stories that shape our world and impact on the lives of ordinary peopleAt Al Jazeera English, we focus on people and events that affect people's lives. We bring topics to light that often go under-reported, listening to all sides of the story and giving a 'voice to the voiceless.' Reaching mo…	0.0414054	2013-11-22T23:51:10.000Z	0.04140541	0.04298873	0.012269821	media	media	11
400	DxJGENaSyd0	Prison Live: Inside and Out - 12 Angry Lebanese promo	Forty-five inmates in Lebanon’s most notorious prison take part in a ground-breaking drama therapy project – their version of ‘Twelve Angry Men’.	0.0415706	2015-06-11T08:17:25.000Z	0.041570585	0.50417477	0.04400689	lebanon	middle east	12
401	M_oDRAVpAlw	Inside Story - How powerful are protest movements?	Every evening for the last 12 days, crowds of young people have gathered in downtown Paris under the banner of a new movement called ‘Nuit Debout’. It loosely translates to Up All Night. And it's become a focal point for a group of people with a shared sense of exclusion from mainstream politics. The movement began as a protest against labour reforms. Expanding to include other grievances like in…	0.041603	2016-06-23T08:21:19.000Z	0.041602973	0.04545349	0.02546905	europe	europe	6
402	dVM49RAV4pM	Week’s most popular documentaries on Al Jazeera	Here are excerpts of the programmes on Al Jazeera English that caught your clicks in the last seven days. • Fault Lines: Invisible Hands (http://aje.io/crtl) • 101 East: Murder in Malaysia (http://aje.io/srn3) • UpFront: Is al-Qaeda a myth? (http://aje.io/wz3g) Let us know what you think in the comments below, or send us a video comment: http://aljvideo.weebly.com/ * Your show. Your view. Have yo…	0.041603	2016-05-30T09:42:38.000Z	0.041602973	0.020957904	0.13136299	media	media	11
403	eveSjW7d75o	Ukuthwala: Abducting young virgins for marriage in South Africa	Rights groups in South Africa are raising awareness about violence against women. Attention is focusing on a custom called Ukuthwala, which involves the abduction of young girls who are then forced to marry older men. Haru Mutasa gained rare access to a community in Pondoland, in the Eastern Cape province, where local people are trying to end this custom. - Subscribe to our channel http://bit.ly/…	0.041614	2015-12-11T02:26:58.000Z	0.04161401	0.32324874	0.036039937	africa	africa	1
404	k9BEAF-MGv8	Tiny Fiji key contributor to UN missions	Earlier this month, forty-five UN peacekeepers were released after being kidnapped and held for two weeks in Syria. The troops, all from Fiji, were captured on the Syrian side of the Golan Heights by the Al-Qaeda affiliated Nusra Front. Al Jazeera's Andrew Thomas reports from Fiji's capital Suva, about why the nation provides the UN with more soldiers, per capita, than any other country. Subscrib…	0.0416836	2014-09-21T10:42:26.000Z	0.04168357	0.06379118	0.0439961	africa	africa	1
405	1ElnwJ4YW2M	Counting the Cost - Was the Spanish bank bailout botched?	It has been a big week in Europe, with what was for a long time seen as a periphery problem now clearly heading towards the core. The big economies of Spain, Italy and even France are now looking increasingly shaky.	0.0417012	2012-06-25T03:14:16.000Z	0.041701227	0.13285479	0.10529099	europe	europe	6
406	MljhUIiJnAY	Olympic murals draw attention in Rio	As the Rio Olympics wind down, one of the last competitions is the men’s marathon, where Ethiopian runner and refugee athlete Yonas Kinde will compete. Two murals in Rio are not only honouring the 10-member Olympic refugee team, but also highlighting indigenous peoples from five different continents. Al Jazeera’s Gabriel Elizondo reports from Rio de Janeiro. - Subscribe to our channel: http://aje…	0.041797	2016-08-22T08:15:32.000Z	0.041796964	0.013102341000000002	0.006163041	europe	europe	6
407	vUF9rl7NnZ4	Ukraine's president offers concessions as protests spread	Ukraine's President has promised to reshuffle his government and amend new anti-protest laws. The offer from Viktor Yanukovich comes as mass protests continue around the country. Demonstrators are occupying or laying siege to government buildings in the capitals of 12 of Ukraine's 25 regions. There's an uneasy truce in place following the deaths of five demonstrators earlier in the week.	0.0418043	2014-01-25T18:07:41.000Z	0.041804336	0.11340292	0.13502766	africa	africa	1
408	9KcjY2TVQOc	India flood victims continue to struggle	It has been two months since floods and landslides killed thousands of people in northern India. The disaster had prompted the biggest ever Indian airlift operation in efforts to save survivors. Many flood victims in Uttarkhand state blame the government for failing to compensate them after their homes and property were destroyed by what one official described as the 'Himalayn tsunami'. Al Jazeer…	0.041816	2013-08-16T12:22:08.000Z	0.041815955	0.24647280000000002	0.11895869	asia	asia	3
409	h1LJX7XK6b8	Latin America Investigates - Coming Soon promo	Journalists from across Latin America investigate violence, exploitation, corruption and abuse.	0.0418236	2016-11-13T14:54:47.000Z	0.041823603	0.1230765	0.4105258	latin america	latin america	10
410	6KceI7wyvqo	Al Jazeera's acting Managing Director decries Egypt trial delay	Al Jazeera's acting Managing Director has decried the repeated adjournments of the retrial of three Al Jazeera journalists in Cairo, slamming the “ludicrous groundless charges” against the network’s staff. Giles Trendle made the comments after the retrieal of Egyptian Baher Mohamed, Canadian Mohamed Fahmy and Australian Peter Greste was adjourned on Sunday for a tenth time in Egypt. The court in …	0.0418405	2015-08-02T19:01:38.000Z	0.041840497000000004	0.16826914	0.0024061366	egypt	middle east	12
411	4uq1wEdnrWg	Bosnians protest high unemployment	Thousands of Bosnians took to the streets for a third day on Friday to protest factory closings, unpaid salaries and widespread unemployment. Protesters stormed federal buildings and set them on fire. And around 200 people were injured in clashes throughout the country, according to medical personnel. Bosnia has not seen this level of unrest since the end of the 1995 war. Al Jazeera's Imtiaz repo…	0.0419599	2014-02-08T12:18:06.000Z	0.04195992	0.15429711	0.04616598	middle east	middle east	12
412	2XOYBJB5zhM	The Stream - 12April2015 promo	Subscribe to our channel http://bit.ly/AJSubscribe The Stream is an online community and daily television show powered by social media and citizen journalism.	0.0419798	2015-04-12T15:21:37.000Z	0.04197978	0.073206715	0.02391673	media	media	11
413	Eaq-KlFMoLA	Japan earthquake area devastated by second tremor	At least 19 people are now confirmed dead after another earthquake in southern Japan. The magnitude 7.3 tremor happened in Kumamoto on Kyushu island, from where Al Jazeera's Rob McBride reports. - Subscribe to our channel: http://bit.ly/AJSubscribe - Follow us on Twitter: https://twitter.com/AJEnglish - Find us on Facebook: https://www.facebook.com/aljazeera - Check our website: http://www.aljaze…	0.0420214	2016-04-16T07:52:07.000Z	0.027365174	0.0775706	0.027214235	asia pacific	asia	3
414	0O1fhunH0oM	Bitcoin optimistic despite major setback	The digital currency, Bitcoin, was described as the money of the future, and destined to become a part of our everyday lives. But now, after its largest online exchange was shut amid claims of fraud and theft, serious doubts hang over its future. Al Jazeera's Tarek Bazley spoke to Jon Matoni, executive director of Bitcoin Foundation, at the Mobile World Congress in Barcelona, Spain.	0.0420493	2014-02-27T01:56:00.000Z	0.042049255	0.0455134	0.042744946	united states	us & canada	19
415	G4w8bTeDpbw	Angola's ruling party wins general election	Subscribe to our channel http://bit.ly/AJSubscribe Angola President Jose Eduardo dos Santos' nearly 33 years in power looks set to be extended after his ruling People's Movement for the Liberation of Angola (MPLA) party took 74.46 per cent of votes in national elections, according to provisional results. Julia Ferreira, an electoral commission spokeswoman, said on Saturday that with about 58 per …	0.0420857	2012-09-01T17:18:36.000Z	0.042085726	0.04878196	0.0033524486	africa	africa	1
416	soJlsb1pM8Y	Panama City initiative turns thugs into tour guides	Like it's neighbors across Central America, Panama is struggling with gang-related violence. But an unusual partnership in one neighbourhood seems to be curbing the gang problem. Al Jazeera's David Mercer reports from El Casco Viejo. Subscribe to our channel http://bit.ly/AJSubscribe Follow us on Twitter https://twitter.com/AJEnglish Find us on Facebook https://www.facebook.com/aljazeera Check ou…	0.042463	2015-11-04T19:07:12.000Z	0.0045304587	0.41564104	0.065066494	latin america	latin america	10
417	do2oj26tc2I	Argentina: Blind and deaf explore universe at interactive planetarium	A planetarium has opened in Buenos Aires where everyone can touch the stars. It has tactile and audio aids so the blind and deaf can also explore the universe. Al Jazeera's Daniel Schweimler reports from Buenos Aires, Argentina.	0.0425975	2016-12-25T19:43:06.000Z	0.04259748		0.23754409	politics	politics	13
418	n1r5uwEFFN0	Saving the coral reef - TechKnow	Coral reefs are the 'rain forests of the sea', prized for their beauty and resources the world over. They are also one of the earth's most vulnerable ecosystems threatened by climate change. And no place better symbolises their importance and their plight than Australia's Great Barrier Reef. TechKnow's Marita Davison traveled to Queensland to explore the scientific efforts to save one of the worl…	0.0426124	2017-05-07T14:13:20.000Z	0.042612422000000004	0.03720023	0.04750909	environment	environment & weather	5
419	K9m_7VaxVlk	Post-quake tour of Nepal's historic Bhaktapur	Subscribe to our channel http://bit.ly/AJSubscribe Subscribe to our channel http://bit.ly/AJSubscribe Nepal is reopening many historic sites after the April quake. But the UNESCO listed Changu Narayan temple in Bhaktapur district won't be one of them. It's one of the worst hit heritage sites. Al Jazeera's Annette Ekin was there in the days following the quake. Reaching more than 270 million house…	0.0426124	2015-06-22T15:28:27.000Z	0.042612422000000004	0.17156741	0.01927814	media	media	11
420	mcRnocTG5bM	Nigeria investigates child-trafficking claims	Child welfare officials in Nigeria raided the house where 25 children were kept after neighbours became suspicious about the number of children there. The woman holding the children has been charged and jailed for running an illegal orphanage, and is being investigated on suspicion of trafficking. Authorities say the children were kept in appalling conditions. Al Jazeera's Yvonne Ndege reports fr…	0.0426124	2013-09-13T23:29:10.000Z	0.042612422000000004	0.3872235	0.11752788	africa	africa	1
421	BPjShghxiUQ	Talk to Al Jazeera - Joyce Banda: 'We must own the fight'	The embattled president of the African nation says fight against corruption has to come from within, not from the West. In this episode of Talk to Al Jazeera, Jamal Elshayyal talks to Malawi's President Joyce Banda, about the country's efforts to curb corruption, human rights and HIV/AIDS which is a big health issue in Malawi.	0.0426125	2013-11-30T14:45:58.000Z	0.04261245	0.12074611	0.18596052	africa	africa	1
422	YZIV87XHsAU	More deaths reported as Balkan rivers swell	The worst flooding in a century in the Balkans, has killed at least 44 people across Serbia, Bosnia and Croatia. Thousands of people have also been forced to evacuate from their homes. Three months' worth of rain has fallen on the region in three days, and the rising flood water is threatening Serbia's biggest power plant along the banks of Sava River. Al Jazeera's Peter Sharp reports.	0.0427232	2014-05-18T15:20:12.000Z	0.04272315	0.13929947	0.1820236	asia	asia	3
423	q9k6MC69_DU	South Africa female miners face sexual harassment	Mining executives from all over the world are meeting in South Africa to discuss the state of their industry. But the hosts have their hands full with a strike by tens of thousands of platinum miners. The miners have refused a new wage offer to end the week-long strike Meanwhile, female miners are complaining of sexual harassment underground. Al Jazeera's Tania Page reports from Johannesburg.	0.0428023	2014-01-30T20:43:15.000Z	0.042802325999999995	0.45672885	0.23628312	africa	africa	1
424	5h4fw0JXXwI	Brussels suspect sought: Belgium releases new footage	Belgian police have released new video of a man wanted in connection with last month's Brussels airport bombing. He's believed to have escaped after his explosives failed to detonate, but prosecutors hope the new footage may help track him down. Al Jazeera's Nadim Baba reports. Subscribe to our channel http://bit.ly/AJSubscribe Follow us on Twitter https://twitter.com/AJEnglish Find us on Faceboo…	0.042806	2016-04-09T20:43:07.000Z	0.042805965999999994	0.118799075	0.11561773	europe	europe	6
425	QJ-mELen_GI	Argentinian waiters compete in annual race	Subscribe to our channel http://bit.ly/AJSubscribe Subscribe to our channel http://bit.ly/AJSubscribe The Argentinian capital, Buenos Aires, has a long history of waiting tables, a skill brought to the country by Italian and Spanish immigrants. The tradition is celebrated in the form of a 3.2km race that sees hundreds of participants compete against each other while balancing a tray containing a …	0.0428094	2014-04-27T12:22:07.000Z	0.0428094	0.15200363	0.014480612	media	media	11
426	Bx0Z2eIrxmM	Congo opposition warns against 'unfair' election	Voters in the Republic of Congo will head to the polls on Sunday to elect a new leader. President Denis Sassou Nguesso is running to extend his long years in office, but the opposition says the vote is flawed. Al Jazeera's Haru Mutasa reports from the capital, Brazzaville. -Subscribe to our channel http://bit.ly/AJSubscribe -Follow us on Twitter https://twitter.com/AJEnglish -Find us on Facebook …	0.0428532	2016-03-20T13:21:57.000Z	0.042853195	0.11346503	0.052120164000000004	africa	africa	1
427	SS0hJgDa7lc	Independent watchmaker preserves the art of time	As the clock winds down on 2015, Al Jazeera visits a small suburb just outside Tokyo, where independent watchmaker Masahiro Kikuno works in a tiny, one-room workshop, filled with vintage tools and primitive machinery he bought from online auctions. Subscribe to our channel http://bit.ly/AJSubscribe Follow us on Twitter https://twitter.com/AJEnglish Find us on Facebook https://www.facebook.com/alj…	0.0429231	2016-04-02T01:08:04.000Z	0.050072517000000004	0.013394522	0.051010028	africa	africa	1
428	Kxry7-CIpZk	Killing the Messenger - promo	As censorship increases worldwide, journalists are being attacked, kidnapped and even killed for exposing the truth. - Subscribe to our channel: http://bit.ly/AJSubscribe - Follow us on Twitter: https://twitter.com/AJEnglish - Find us on Facebook: https://www.facebook.com/aljazeera - Check out our website: http://www.aljazeera.com/	0.0429648	2015-12-17T09:14:54.000Z	0.04296476	0.7767275	0.3006292	media	media	11
429	nUGAWHcefHQ	Witness - On the E-Waste Trail promo	Subscribe to our channel http://bit.ly/AJSubscribe An investigation into the trail of illegal e-waste from Europe and the US to Ghana and China, and the resultant irreparable environmental damage	0.0429894	2014-10-02T20:40:55.000Z	0.042989387999999996	0.32034317	0.17297065	china	asia	3
430	JLLMGsPcmwQ	Commuters stranded after Brazil driver strike	Bus drivers in Rio de Janeiro has staged a 48-hour walkout in a dispute over pay and working conditions. The industrial action leaves more than a million people without transport in a city due to host World Cup matches in just over a month. A court has ordered the majority of drivers to return to work but it is not clear whether they will comply. Al Jazeera's Gabriel Elizondo reports.	0.0429974	2014-05-14T16:01:34.000Z	0.042997442000000004	0.16007029	0.013349835	asia	asia	3
431	vlGwFbPcoT8	Featured Documentary - 28 Up South Africa promo	Subscribe to our channel http://bit.ly/AJSubscribe The South Africans filmed at age 7, 14 & 21 are now 28. We pick up their journeys into adulthood and gain extraordinary insights into South Africa in 2013.	0.0430426	2015-02-17T15:35:28.000Z	0.04531131	0.02625781	0.019415583	africa	africa	1
432	sLuYk8fT76w	Cambodia's opposition chief says he has been forced into exile	Cambodia's opposition leader has told Al Jazeera he's been forced into exile again. Sam Rainsy is facing an arrest warrant over a long standing defamation conviction. The legal action has prompted international condemnation and raised concerns over elections due in 2017. Al Jazeera's Wayne Hay reports from Phnom Penh. Subscribe to our channel http://bit.ly/AJSubscribe Follow us on Twitter https:/…	0.0430742	2015-12-07T00:30:33.000Z	0.043074165	0.2970047	0.09929256	politics	politics	13
433	1McImRxAI24	Syria strike set to hijack G20 agenda	World leaders from G20 are meeting in St Petersburg, Russia, amid sharp differences over possible US military action against Syria, in response to what the US administration calls a deadly chemical weapons attack. Thursday's summit comes hours after a US Senate panel voted to give President Barack Obama authority to use military force against Syria - the first time lawmakers have voted to allow m…	0.0432237	2013-09-05T18:13:58.000Z	0.03129641	0.40687656	0.05968526	politics	politics	13
434	NrlawztKG7Q	The Listening Post - January 2017 promo	A weekly programme that examines and dissects the world's media. - Subscribe to our channel: http://aje.io/AJSubscribe - Follow us on Twitter: https://twitter.com/AJEnglish - Find us on Facebook: https://www.facebook.com/aljazeera - Check our website: http://www.aljazeera.com/	0.0432258	2017-01-14T06:53:08.000Z	0.03829963		0.028791418	united states	us & canada	19
435	acha7mRjfWE	A Music School for Bangkok's Slums	Gigi Nemrod is the founder of Khlong Toey Music Program, a program for underprivileged children in one of Bangkok's biggest slums.	0.0432507	2016-12-27T14:44:41.000Z	0.04325071		0.21565786	arts & culture	arts & culture	2
436	l-IyKGcBTjI	China-N Korea border river popular with tourists	The river border separating North Korea from its ally China is becoming increasingly popular with Chinese tourists. Al Jazeera's Rob McBride reports from Dandong on the Yalu River. - Subscribe to our channel: http://bit.ly/AJSubscribe - Follow us on Twitter: https://twitter.com/AJEnglish - Find us on Facebook: https://www.facebook.com/aljazeera - Check out our website: http://www.aljazeera.com/	0.0432816	2015-11-27T15:05:44.000Z	0.043281622	0.04341997	0.022025561000000003	asia pacific	asia	3
437	pD28ikJ_a7s	Space memorabilia auction launched in US	Have you ever wanted to own a tiny piece of the moon? An auction house in New York City is selling off space memorabilia, including rare items covered in lunar dust.	0.0432816	2014-04-08T08:07:42.000Z	0.043281622	0.021168385	0.17929813	science & technology	science & technology	17
438	48lNB7oQu2s	The Stream - Snapshots of humanity	Subscribe to our channel http://bit.ly/AJSubscribe On The Stream: A conversation with Brandon Stanton, creator of the photo blog 'Humans of New York'. At Al Jazeera English, we focus on people and events that affect people's lives. We bring topics to light that often go under-reported, listening to all sides of the story and giving a 'voice to the voiceless.' Reaching more than 270 million househ…	0.0432816	2013-12-12T07:21:22.000Z	0.043281622	0.07552993	0.013781073	media	media	11
439	fnQA7mAtEIw	Sudan and South Sudan strike oil deal	Subscribe to our channel http://bit.ly/AJSubscribe Sudan and South Sudan have ended an oil dispute that nearly ignited an all-out war earlier this year. The freeze in the flow of oil during the dispute had a major impact on the economies and people of both countries. Al Jazeera's Imran Khan reports.	0.0432816	2012-08-04T07:37:03.000Z	0.043281622	0.03463082	0.0217811	africa	africa	1
440	GQTuTEyLv_k	The Cafe - Promo: Athens: The end of the European dream?	Subscribe to our channel http://bit.ly/AJSubscribe Greece is a country on the brink of economic and social collapse. Unemployment is on the rise and the far-right is on the march. The Cafe travels to Athens to find out what the future holds for the birthplace of western democracy. At Al Jazeera English, we focus on people and events that affect people's lives. We bring topics to light that often …	0.0432816	2012-07-11T15:59:48.000Z	0.043281622	0.043126285	0.01631076	europe	europe	6
441	tu9112r8IXI	Greek art scene invigorated by crisis	The Greek economic crisis has inevitably affected the country's commercial art sales. Yet as Al Jazeera's Jacky Rowland reports from Athens, times of social turmoil can also fuel creative industries.	0.0434394	2012-08-25T18:34:52.000Z	0.043439425999999996	0.08443388	0.06224635200000001	arts & culture	arts & culture	2
442	MkUlNRvVdRg	Viewfinder - extra: Khushboo's Deadline	Subscribe to our channel http://bit.ly/AJSubscribe Subscribe to our channel http://bit.ly/AJSubscribe Sixteen-year-old Khushboo is an aspiring journalist living in a remote village in India's poorest state, but while Khushboo focuses on her career, her father has already begun the search for a suitable husband. At Al Jazeera English, we focus on people and events that affect people's lives. We br…	0.043533	2016-03-03T22:16:29.000Z	0.04353303	0.10766389999999999	0.01046586	media	media	11
443	bpfP9EisbQk	Witness - Casablanca Calling promo	Subscribe to our channel http://bit.ly/AJSubscribe Women and Islam in Morocco is explored through the work of the newly installed female Morchidat or spiritual guides.At Al Jazeera English, we focus on people and events that affect people's lives. We bring topics to light that often go under-reported, listening to all sides of the story and giving a 'voice to the voiceless.' Reaching more than 27…	0.0435559	2014-11-22T15:54:55.000Z	0.04355591	0.09798960000000001	0.014210704	media	media	11
444	Cm7w3WpK6nU	Consumer Elkectronics, Kite Power & the $1M Electric Car - Science & Technology on Downstream	Subscribe to our channel http://bit.ly/AJSubscribe Subscribe to our channel http://bit.ly/AJSubscribe Downstream is Al Jazeera’s weekly look at the top stories from the world of science and tech with Tarek Bazley. Join in on the conversation on Twitter: #AJDownstream In this episode (Jan 8, 2015): - CES - The latest in consumer tech - Kite Power - Harvesting wind in the Netherlands - Russia's Inn…	0.0436157	2017-01-12T13:30:50.000Z	0.044411544000000004	0.014485023999999999	0.015076824	media	media	11
445	NoIgQAuAoig	Inside Story - Can the UN halt CAR killings?	The United Nations takes over responsibility for peacekeeping in troubled Central African Republic. Hazem Sika speaks to James Schneider, editor of Think Africa Press; Lewis Mudge, researcher for Human Rights Watch - Africa Division; and Emmanuel Dupuy, president of the Institute for Prospective and Security in Europe.	0.0436381	2014-09-16T14:23:06.000Z	0.029937103	0.18906889999999998	0.0068744035	africa	africa	1
446	ePNVEvjZhFw	What's behind Turkey's ruling AK party setback?	Erdogan wanted a mandate for his political reforms, but voters in Turkey handed him a rebuke. Presenter: Kamahl Santamaria Guests: Bilal Sambur - head of the SESA Institute of Political, Social and Economic Studies Fadi Hakura - specialist on Turkey at Chatham House Galip Dalay - editor of Inside Turkey, a quarterly political magazine	0.0436387	2015-06-08T21:33:13.000Z	0.043638695	0.16372697	0.06432302	middle east	middle east	12
447	1Bvw8nxrjZc	Correspondent - Kristen Saloomey 30'' promo	Subscribe to our channel http://bit.ly/AJSubscribe Correspondent - Kristen Saloomey promo	0.043666	2014-09-25T18:11:54.000Z	0.043665957000000005	0.030496407000000007	0.054869432	media	media	11
448	9qUQKnGbBIo	HK protesters threaten to occupy government buildings	Protesters demanding free and fair elections have threatened to occupy government buildings unless Hong Kong's Chief Executive stands down. It's the early hours of Thursday in Hong Kong and there are still thousands of people out on the streets. Al Jazeera's Rob McBride reports from Hong Kong. Subscribe to our channel http://bit.ly/AJSubscribe Follow us on Twitter https://twitter.com/AJEnglish Fi…	0.0438	2014-10-01T23:50:36.000Z	0.043799977999999996	0.38894209999999996	0.11512876	politics	politics	13
449	Zvo2082TGIo	Counting the Cost - Extra - UK's fiscal health: 'Weak, but better than others'	Expert says uncertainty over UK's place in the EU could hurt London in lead up to upcoming referendum. - Follow us on Twitter https://twitter.com/AJEnglish - Find us on Facebook https://www.facebook.com/aljazeera - Check out our website:http://www.aljazeera.com/	0.0438304	2015-07-05T15:58:40.000Z	0.043830387	0.05209573	0.053862453	europe	europe	6
450	eixOODOEsFE	Stream Leads 18/10/2012	Subscribe to our channel http://bit.ly/AJSubscribe China's 'basketball grandma' becomes Internet star, Russian dissident live-tweets detention At Al Jazeera English, we focus on people and events that affect people's lives. We bring topics to light that often go under-reported, listening to all sides of the story and giving a 'voice to the voiceless.' Reaching more than 270 million households in …	0.0439266	2012-10-18T22:35:42.000Z	0.037684225	0.020574048	0.016578746999999998	media	media	11
451	UYU7sQ_6NT4	UN warns of South Sudan famine	The United Nations says two and a half million people are on the brink of famine, and food stocks in some places could run out by next month. The UN also says more than 6 million people, over half of South Sudan's population, need aid. Al Jazeera's Dominic Kane reports. Subscribe to our channel http://bit.ly/AJSubscribe Follow us on Twitter https://twitter.com/AJEnglish Find us on Facebook https:…	0.0439508	2015-02-10T05:00:31.000Z	0.043950822	0.118057154	0.050323766	africa	africa	1
452	oTt_A-KKe6o	Science in a Golden Age - Chemistry promo	From Jabir ibn Hayyan to Al Kindi to Al Razi, Jim Al-Khalili introduces us to the work of medieval chemists and reveals their influence on modern chemistry.	0.0439935	2015-10-26T15:22:55.000Z	0.04399354	0.007607437	0.0017526979	science & technology	science & technology	17
453	n-R3oijrdbs	Environmental lawyer and Chevron in court battle	Environmental lawyer Steven Donziger is trying to hold the oil giant Chevron accountable for allegedly dumping toxic waste in Ecuador's rainforests. He is currently appealing a recent verdict. Al Jazeera's Kristen Saloomey reports from New York. Correction, 21/4/2015: An earlier version of this description stated that environmental lawyer Steven Donziger had lost his appeal against Chevron. This …	0.0439941	2015-04-22T17:48:33.000Z	0.043994073	0.033981815	0.14617495	politics	politics	13
454	mfGsExtspM4	People & Power - Karachi Cop promo	Subscribe to our channel http://bit.ly/AJSubscribe The extraordinary behind-the-scenes story of Pakistan's toughest police chief. Subscribe to our channel http://bit.ly/AJSubscribe	0.0439997	2014-03-19T13:56:28.000Z	0.043999664	0.09733884	0.063014105	asia	asia	3
455	lZNYlRq86oQ	Thai government trying to clean up fishing industry	Officials from the European Union are in Thailand to assess whether the country is doing enough to clean up its fishing industry. In April, the EU gave Thailand six months to act against illegal 'overfishing' or face sanctions Another concern is growing evidence that hundreds of people are working as slaves on Thai ships at sea. Al Jazeera's Andrew Thomas met a Thai fisherman who was rescued from…	0.0440484	2015-06-11T08:16:22.000Z	0.044048417	0.104493484	0.04737755	europe	europe	6
456	HWh4LYCimlI	Bolivia floods cause financial ruin	Torrential rain is continuing to cause floods across Bolivia. With 80 percent of the northeast state of Beni, an area five times the size of Switzerland flooded; farmers are facing financial ruin. Al Jazeera's Mariana Sanchez reports from Beni.	0.0440935	2014-02-16T02:56:36.000Z	0.044093505	0.3075991	0.11086616	asia	asia	3
457	BwTs-tEa03k	The Cure - Episode 8 - Mending Minds: Part 1	Subscribe to our channel http://bit.ly/AJSubscribe Subscribe to our channel http://bit.ly/AJSubscribe Between 1989 and 2003, Liberia was torn apart by brutal civil wars that left around 250,000 people dead and millions more suffering. But despite high rates of depression and post-traumatic stress disorder, the country has only two psychiatrists and one inpatient mental health facility. At Al Jaze…	0.0441002	2013-08-28T11:36:45.000Z	0.04410024	0.05128052	0.02258747	europe	europe	6
458	AVTv549VfPI	Burkina Faso's ex-President Blaise Compaore faces trial	Burkina Faso's ex-President Blaise Compaore faces trial The trial of Burkina Faso's ex-President Blaise Compaore is due to start on May 15 following long delays. Compaore and 34 of his ministers are accused of authorising the killings of unarmed protesters in the uprising that brought down his regime. If convicted, the High Court is expected to request the extradition of the former leader from Iv…	0.0441176	2017-05-15T15:26:49.000Z	0.044117632999999996	0.14722748	0.09622874	europe	europe	6
459	jxh8_XlGGl4	Former homeless people offer Berlin tours	Former homeless people are offering tours of Berlin to show how the German capital looks when you do not have a home. The idea is to allow locals and visitors to understand the city from the viewpoint of the poor - and to treat the homeless with more respect. Al Jazeera's Nick Spicer has been taking the tour.	0.0441193	2013-08-14T14:14:01.000Z	0.014954572	0.06036816	0.07434556	europe	europe	6
460	A-7o3BFuzT8	Myanmar's Aung San Suu Kyi holds rally ahead of vote	Millions of people are preparing to cast their votes in Myanmar's first multi-party elections in 25 years. Campaigning is in full swing, with opposition leader Aung San Suu Kyi holding a rally in the largest city of Yangon. Al Jazeera's Florence Looi reports from Yangon. Subscribe to our channel http://bit.ly/AJSubscribe Follow us on Twitter https://twitter.com/AJEnglish Find us on Facebook https…	0.0441373	2015-11-02T07:36:48.000Z	0.044137273	0.08002003	0.034792442	myanmar	asia	3
461	vlrGJwbnAN0	South Korea MPs leave ruling party after scandal	Dozens of South Korean MPs have left the ruling conservative party over the corruption scandal surrounding impeached President Park Geun-hye. Al Jazeera's Craig Leeson reports from Seoul. - Subscribe to our channel: http://aje.io/AJSubscribe - Follow us on Twitter: https://twitter.com/AJEnglish - Find us on Facebook: https://www.facebook.com/aljazeera - Check our website: http://www.aljazeera.com/	0.0442721	2016-12-27T06:06:13.000Z	0.044272117		0.112029485	asia pacific	asia	3
462	d4rThJf5khs	Myanmar vigilantes take on drug lords	Vigilantes in Myanmar are taking on powerful drug lords to stop the narcotics trade. Drug production has helped to fund rebel armies, and some government officials are accused of being involved. Al Jazeera's Wayne Hay reports. - Subscribe to our channel: http://bit.ly/AJSubscribe - Follow us on Twitter: https://twitter.com/AJEnglish - Find us on Facebook: https://www.facebook.com/aljazeera - Chec…	0.0442815	2016-03-22T08:01:57.000Z	0.044281542	0.6207513000000001	0.11666641	asia pacific	asia	3
463	iOKEJBPe5uE	Play about US whistleblower wins awards	Former US soldier Bradley Manning faces up to 90 years in prison for leaking thousands of secret US military and diplomatic documents to WikiLeaks. At the same time, a play about his early life is winning awards. The Radicalisation of Bradley Manning is currently playing at the Edinburgh festival. Al Jazeera's Charlie Angela reports from Edinburgh.	0.0443007	2013-08-20T17:03:41.000Z	0.044300694	0.061071300000000016	0.067713335	politics	politics	13
464	sXt9o5HyXsU	Cambiaso, the Messi of polo	He looks like any other polo player here at the Santa Maria Club in Spain but he's not. Adolofo Cambiaso isn't exactly a household name but in the world of polo the Argentine is regarded as a true legend For people who follow the sport, Cambiaso is to polo what Lionel Messi is to football. The sport's top-ranked player normally shuns the media spotlight rarely giving interviews. but he does take …	0.0443461	2017-07-21T12:50:30.000Z	0.04434606	0.06538645	0.026637722000000003	sport	sport	18
465	6p7KAiUWgJ8	Indian Hospital - Revisited : Episode two	In 2012 we brought you the story of Narayana Hrudayalaya, an Indian hospital that aimed to give the best possible treatment to the rich and poor alike. We have returned to India after two years to revisit the doctors and patients we met to see how their lives and stories have evolved. Watch the full interactive film at www.aljazeera.com/indianhospital	0.044394	2017-07-22T12:05:16.000Z	0.04439398	0.0042019184	0.014907866	asia	asia	3
466	euL3Nd2nJmk	US Presidential Elections	- Subscribe to our channel: http://aje.io/AJSubscribe - Follow us on Twitter: https://twitter.com/AJEnglish - Find us on Facebook: https://www.facebook.com/aljazeera - Check our website: http://www.aljazeera.com/	0.0444712	2016-11-03T18:14:39.000Z	0.044471245	0.027692074	0.0071871737	africa	africa	1
467	TqvycRIAWK4	Uganda's mountain community seeks sustainability	Mountains are home to about twelve percent of the world’s population and most of them, like the Ik people of Uganda, depend on mountain resources for their survival. Conservationists from around the world have met in Uganda at the World Mountain Forum to help the people who live in mountainous regions to sustain their way of life. Al Jazeera’s Malcolm Webb reports from Usake in Uganda. - Subscrib…	0.0445193	2017-07-23T01:17:19.000Z	0.05887731	0.050511364	0.011354666000000001	africa	africa	1
468	CFSVZRYbk2c	Rebel Architecture (extended version) promo	Subscribe to our channel http://bit.ly/AJSubscribe Rebel Architecture profiles the architects using design as a form of activism and resistance, turning away from elite “starchitecture” projects, to design for the majority.	0.0445695	2014-08-31T05:39:48.000Z	0.008249965	0.01812792	0.01591641	syria's civil war	war & conflict	20
469	n-TEzEMgYek	US father co-creates bionic pancreas via iPhone	A biomedical engineer in the US has used his expertise to help his son who has Type One diabetes. He has co-created a bionic pancreas using an iPhone, sophisticated software and an automated insulin pump. The technology could change the lives of millions of people. Subscribe to our channel http://bit.ly/AJSubscribe Follow us on Twitter https://twitter.com/AJEnglish Find us on Facebook https://www…	0.0445993	2014-06-17T19:53:44.000Z	0.044599272	0.12008938	0.037939336	science & technology	science & technology	17
470	mnXyvKrhOPE	Covellite International Film Festival kicks off in Montana	Film Festivals in the US are well known for the glitz and glamour that comes with red carpet events and big-name actors. But holding a film festival can also have a big economic impact on communities. The mining town of Butte in the state of Montana is holding the first of what organisers hope will be many festivals that could give the city a much-needed boost. Al Jazeera’s Andy Gallacher reports…	0.0446627	2016-09-19T12:08:48.000Z	0.027519055	0.08575898400000001	0.03977508	arts & culture	arts & culture	2
471	7HWyyrgGAGU	The Stream - MH370: A year without answers	Subscribe to our channel http://bit.ly/AJSubscribe On The Stream: MH370: A year without answers. At Al Jazeera English, we focus on people and events that affect people's lives. We bring topics to light that often go under-reported, listening to all sides of the story and giving a 'voice to the voiceless.' Reaching more than 270 million households in over 140 countries across the globe, our viewe…	0.0446743	2017-11-16T08:07:41.000Z	0.031943657	0.044777925999999996	0.010774192	media	media	11
472	9ELoB4Hvjqg	Rio 2016: Olympics close with spectacular ceremony	After more than two weeks of competition, the 2016 Rio Olympics have ended in Brazil. Despite all the concerns around security, Zika and polluted water, sport took centre stage throughout the fortnight. Al Jazeera’s Latin America Editor Lucia Newman reports from the closing ceremony of the Games. - Subscribe to our channel: http://aje.io/AJSubscribe - Follow us on Twitter: https://twitter.com/AJE…	0.0446832	2016-08-22T11:42:35.000Z	0.045435317	0.02697143	0.020585267	latin america	latin america	10
473	P2jvWDgRINI	Special Series - Life on Hold	Subscribe to our channel http://bit.ly/AJSubscribe A web documentary that takes you across Lebanon to uncover the daily realities of Syrians seeking shelter there.	0.0447065	2015-05-25T12:27:02.000Z	0.04470651	0.04614207	0.06835364	lebanon	middle east	12
474	ZGsKrdR3bgM	News Bulletin - 20:00 GMT update	Subscribe to our channel http://bit.ly/AJSubscribe The main headlines on Al Jazeera English, featuring the latest news and reports from around the world.At Al Jazeera English, we focus on people and events that affect people's lives. We bring topics to light that often go under-reported, listening to all sides of the story and giving a 'voice to the voiceless.' Reaching more than 270 million hous…	0.0447331	2014-06-08T11:09:14.000Z	0.0447331	0.029683022000000007	0.010673018	europe	europe	6
475	cBEmyKSO5jY	This week's news roundup (Sep 6 - 10)	A look back at the week's top news stories. (Tell us what you think of Al Jazeera’s news coverage: http://aljvideo.weebly.com/) - For more, visit reVIEW's News Highlights page: http://aljazeera.com/review/news-highlights.html * Your show. Your view. Have your say! We want to hear from YOU. Al Jazeera’s most viewed news coverage, the week’s most popular documentaries, the inside story on how we ge…	0.0447833	2015-09-12T00:55:18.000Z	0.044783305	0.04450487	0.049065396	media	media	11
476	EJHBgAA0MTQ	Mix of cultures, styles at SXSW music festival	Mix of cultures, styles at SXSW music festival One of the world's biggest international music festivals is winding down in the US state of Texas. The South by Southwest festival (SXSW) showcases talent from dozens of countries, styles and traditions. Al Jazeera's Rob Reynolds reports from Austin. - Subscribe to our channel: http://aje.io/AJSubscribe - Follow us on Twitter: https://twitter.com/AJE…	0.0448754	2017-03-20T21:54:44.000Z	0.0448754	0.013090453	0.005030555	arts & culture	arts & culture	2
477	M6AyYScqfcg	Rooibos used to make wine in South Africa	Rooibos tea is made from a native plant in South Africa, but now winemakers have started using the plant too. As Erica Wood reports, it's making it healthier for people to enjoy a glass of their favourite tipple.	0.0449241	2015-06-01T11:57:48.000Z	0.054434802000000004	0.042894684	0.05582759	africa	africa	1
478	QThGAByodgs	Tresor and the Camp Musicians - Witness	A Congolese hip-hop artist exiled in a Malawian refugee camp is determined to fight xenophobia with his music. Subscribe to our channel http://bit.ly/AJSubscribe Follow us on Twitter https://twitter.com/AJEnglish Find us on Facebook https://www.facebook.com/aljazeera Check our website http://www.aljazeera.com	0.0449775	2015-07-23T13:16:57.000Z	0.044977453	0.084531754	0.4022002	africa	africa	1
479	1K4DsmqwtG0	Channel JINAC verdict response : Promo	Subscribe to our channel http://bit.ly/AJSubscribe JINAC verdict response	0.0450176	2014-06-25T20:36:37.000Z	0.06098401	0.048466787000000004	0.045111112	media	media	11
480	B7WCW1_t0NE	Syria: Mother fears over fate of six ‘disappeared’ sons	A Syrian mother who believes her six sons are being held captive by government forces shared her story with Al Jazeera. Um Bashar says her children were snatched from their home when the war began five years ago. She sought refuge and now lives in southern Syria. Al Jazeera’s Emike Umolu reports. - Subscribe to our channel: http://aje.io/AJSubscribe - Follow us on Twitter: https://twitter.com/AJE…	0.0450461	2016-10-25T15:41:12.000Z	0.07684067	0.2289613	0.07275379	middle east	middle east	12
481	EpXD-eCr-nE	Brexit tops European centre-right’s discussions in Malta	Brexit tops European centre-right’s discussions in Malta. The UK’s exit from the European Union was at the forefront of discussions among centre-right European leaders meeting in Malta. Al Jazeera's Paul Brennan reports from Malta. - Subscribe to our channel: http://aje.io/AJSubscribe - Follow us on Twitter: https://twitter.com/AJEnglish - Find us on Facebook: https://www.facebook.com/aljazeera -…	0.0450562	2017-04-07T14:55:20.000Z	0.045056205	0.033530067999999996	0.007897582	europe	europe	6
482	rQ6FUNKufTY	TechKnow - Costa Rica: Journey to the jungle	We take the pulse of Costa Rica's rainforest to find out how global warming affects the 'lungs of the planet'. - Subscribe to our channel: http://bit.ly/AJSubscribe - Follow us on Twitter: https://twitter.com/AJEnglish - Find us on Facebook: https://www.facebook.com/aljazeera - Check our website: http://www.aljazeera.com/	0.0450708	2016-02-01T04:18:31.000Z	0.045070822999999996	0.11796731	0.029563332	africa	africa	1
483	dilLPw2Y8Mc	Counting the Cost - Feature - China & Afghanistan: Future trading partners	Jennifer Glass looks at the consequences of a new Silk Road, as Kabul fosters ties with Beijing. - Subscribe to our channel http://bit.ly/AJSubscribe - Follow us on Twitter https://twitter.com/AJEnglish - Find us on Facebook https://www.facebook.com/aljazeera - Check out our website:http://www.aljazeera.com/	0.045089	2015-06-02T20:08:47.000Z	0.04529725	0.039308336	0.024875911	united states	us & canada	19
484	5Ua7gD6rp38	Egypt and Russia to hold talks	Egypt is due to hold talks with the most senior Russian officials to visit the country in years. Weapons will be high on the agenda as Moscow tries to bring back its influence to a region where it suffered many setbacks. A high level delegation including Foreign Minister Sergey Lavrov, and Defence Minister Sergei Shoigu followed a naval vessel that docked in Alexandria. Al Jazeera's Rory Challand…	0.0451185	2013-11-14T14:04:37.000Z	0.017910264	0.14624833	0.046926733	egypt	middle east	12
485	bvAiQrvxDiA	Teaching Empowerment: Prison Education in Kenya - Rebel Education	Kenyan prison inmates learn how to read and write as well as gaining legal skills to represent themselves in court. - Subscribe to our channel: http://aje.io/AJSubscribe - Follow us on Twitter: https://twitter.com/AJEnglish - Find us on Facebook: https://www.facebook.com/aljazeera - Check our website: http://www.aljazeera.com/	0.0451239	2017-05-15T19:31:56.000Z	0.028367367	0.11833235	0.06286418	africa	africa	1
486	hx4TRvuPC8Y	Burundi reggae band sings for change	A reggae band in Burundi is trying to inspire change through their music. The group sings about corruption, freedom of expression and human rights - issues at the forefront of many people's minds before next year's general election. Al Jazeera' Haru Mutasa reports from Bujumbura, Burundi.	0.0452632	2014-05-03T23:22:23.000Z	0.017906336000000002	0.056803845	0.13477413	africa	africa	1
487	oYyoYvI2VO8	Greece fast-tracks registration process for refugees	The Greek immigration service has launched a fast-track registration process for refugees. The EU border agency Frontex says 540 thousand refugees have landed on Greek islands this year, as Al Jazeera's Mohammed Jamjoom reports from Lesbos. Subscribe to our channel http://bit.ly/AJSubscribe Follow us on Twitter https://twitter.com/AJEnglish Find us on Facebook https://www.facebook.com/aljazeera C…	0.0453609	2016-02-13T21:48:28.000Z	0.05829021700000001	0.106699616	0.047247063	refugees	war & conflict	20
488	jT-99NfmGC8	News Bulletin - 1435 GMT	The main headlines on Al Jazeera English, featuring the latest news and reports from around the world.	0.0453677	2012-11-16T16:55:52.000Z	0.04536769	0.008898318	0.0261813	europe	europe	6
489	Qyeha5GgBjs	Iraq slums: Poverty rates on the rise	Violence, political instability and a struggling economy have left almost a third of Iraq's population without basic services such as water and sanitation. Al Jazeera's Imtiaz Tyab reports from Baghdad on how people are trying to cope. Subscribe to our channel http://bit.ly/AJSubscribe Follow us on Twitter https://twitter.com/AJEnglish Find us on Facebook https://www.facebook.com/aljazeera Check …	0.0453955	2015-12-03T17:36:20.000Z	0.045395475	0.265241	0.13265677	business & economy	business & economy	4
490	1bij1_cvY70	Rumble in the Jungle: 40 years on	It's 40 years since Boxing heavyweights Muhammad Ali and George Foreman fought in what was dubbed the 'Fight of the Century'. Most of boxers weren't even alive when the Rumble in the Jungle took place, but the bout is still inspiring a young cadre of fighters to step into the squared circle. Al Jazeera's Lee Wellings reports from London.	0.0455386	2014-10-30T21:48:06.000Z	0.04553862	0.11389203	0.037897114	africa	africa	1
491	LhU4JZOGuVo	Nicaragua opposition calls for election boycott	Opposition parties in Nicaragua are calling for a boycott of Sunday's presidential election, saying the polls are illegal and lack transparency. President Daniel Ortega, with his wife as his running mate, has amended the constitution to abolish term limits in a bid to extend his rule. Al Jazeera’s Lucia Newman reports from the capital Managua. - Subscribe to our channel: http://aje.io/AJSubscribe…	0.0455931	2016-11-06T12:58:00.000Z	0.045593068	0.19828631	0.119395345	africa	africa	1
492	Y2fn3g367cM	Yemeni city landmarks fall on hard times	Yemen's southern city of Aden was once a vibrant cultural centre. But the city's landmarks, such as the British colonial-era clock known as Big Ben and the house of French poet Arthur Rimbaud, have fallen into disuse and badly need repair. Al Jazeera's Hashem Ahelbarra reports.	0.0456679	2014-11-28T09:45:37.000Z	0.049456257	0.1435152	0.012721581	europe	europe	6
493	iEfId8lofDE	Qatar Museums hosts Picasso-Giacometti exhibition	For the first time in the Middle East, the works of two of the most important artists of the twentieth century are being showcased together. An exhibition dedicated to Pablo Picasso and Alberto Giacometti has opened in Qatar. Al Jazeera's Sara Khairat reports from Doha. - Subscribe to our channel: http://aje.io/AJSubscribe - Follow us on Twitter: https://twitter.com/AJEnglish - Find us on Faceboo…	0.0456945	2017-03-14T02:32:30.000Z	0.04569451	0.04402391	0.0029924798	gcc	middle east	12
494	-TWQnUNT_j0	Asteroid targeted by explosive space mission named	Japan's Space Agency JAXA has announced the results of a competition to name asteroid 1999 JU3, the 980m-wide space rock it hopes to target with its sample-return mission Hayabusa2. The agency chose the name Ryugu from over seven thousand suggestions. Read Al Jazeera America's recent report on the global arms trade: http://bit.ly/1PeTe3A Subscribe to our channel http://bit.ly/AJSubscribe Follow u…	0.0457587	2015-10-06T10:14:41.000Z	0.045758683	0.120789714	0.01095266	science & technology	science & technology	17
495	88_hKqOvPzE	Azerbaijan’s economy hit hard by falling oil prices	Like many energy-exporting countries, Azerbaijan's economy has been hit hard by the falling price of oil. A collapsing currency and rising prices are making life difficult. Al Jazeera's Rory Challands reports from Baku. - Subscribe to our channel: http://bit.ly/AJSubscribe - Follow us on Twitter: https://twitter.com/AJEnglish - Find us on Facebook: https://www.facebook.com/aljazeera - Check our w…	0.0457672	2016-04-17T18:00:27.000Z	0.04576718	0.10790903	0.050520107	business & economy	business & economy	4
496	qJ39H0tDXF0	France announces new recovery plan for auto sector	Subscribe to our channel http://bit.ly/AJSubscribe In France, the government has announced a plan to help its struggling car industry. Thousands of jobs are under threat. Al Jazeera's Tim Friend has more from Paris. At Al Jazeera English, we focus on people and events that affect people's lives. We bring topics to light that often go under-reported, listening to all sides of the story and giving …	0.0458186	2012-07-26T13:49:29.000Z	0.04581864	0.04762408	0.039272316	europe	europe	6
497	2FXLsqpvVxc	earthrise - Urban Oil Men	Subscribe to our channel http://bit.ly/AJSubscribe Subscribe to our channel http://bit.ly/AJSubscribe Waste cooking oil from fast food outlets is being converted into bio-diesel, reducing waste and pollution. At Al Jazeera English, we focus on people and events that affect people's lives. We bring topics to light that often go under-reported, listening to all sides of the story and giving a 'voic…	0.0458672	2013-07-17T21:04:22.000Z	0.045867175	0.19517624	0.029869601000000006	media	media	11
498	XtVbUhMNXQg	Al Jazeera Correspondent - Off The Rails: A Journey Through Japan promo	A window into Japanese culture and society through its railway system led by Ramsey Zarifeh who first travelled to Japan to teach English after college.	0.0459396	2015-10-01T00:04:26.000Z	0.04593957	0.045361377	0.029389363	arts & culture	arts & culture	2
499	ggOYgTNVCww	Palestine Remix : Haunting Memories	PALESTINE REMIX: Memories of Uprooting Palestinians from their Homeland . Use this clip from 'Born in 1948' documentary and mix it with other clips using the new Remix tool to make your own story on our website: http://www.palestineremix.com Like us on Facebook: English page https://www.facebook.com/PalestineRemix Arabic page http://www.facebook.com/PalestineRemixAr Follow us on Twitter https://t…	0.0460163	2015-09-13T15:07:05.000Z	0.04601629	0.14077674	0.07672812	middle east	middle east	12
500	bq_SbD5tO-o	Malaysia cuts spending amid oil price plunge	Malaysia has cut its economic growth target for the year and trimmed spending amid a slump in global oil prices that has reduced government revenue and derailed plans to cut the country's budget deficit to a planned three percent. Al Jazeera's Sohail Rahman reports from Kuala Lumpur. Subscribe to our channel http://bit.ly/AJSubscribe Follow us on Twitter https://twitter.com/AJEnglish Find us on F…	0.0461187	2015-01-21T07:20:10.000Z	0.046118654	0.13283427	0.06881008	africa	africa	1
501	X4UgtMO48L4	New ATM-style water dispensers launched in Kenya	Thousands of experts have gathered in Stockholm for World Water Week. The theme this year is 'Water for Development,' focusing on making sure resources are used efficiently. Al Jazeera's Catherine Soi reports from Kenya on a scheme trying to give people better access to water. Subscribe to our channel http://bit.ly/AJSubscribe Follow us on Twitter https://twitter.com/AJEnglish Find us on Facebook…	0.0462899	2015-08-26T05:27:47.000Z	0.023075774	0.022230558	0.04545504	africa	africa	1
502	YrO6iGDIn7I	Court rules Happy Birthday song is free to use	A US judge has ruled the widely recognised song - Happy Birthday to You - as public property. The ruling ends the copyright claim by Warner Chappel Music on the song and grants millions of dollars in compensation for those who have been charged for using it. Al Jazeera’s Tom Ackerman reports from Washington, DC. - Subscribe to our channel: http://aje.io/AJSubscribe - Follow us on Twitter: https:/…	0.0463215	2016-07-01T13:26:18.000Z	0.046321474	0.08930700000000001	0.017917875	africa	africa	1
503	0mjzHgIPzP4	Pirate Fishing: Al Jazeera’s gamification of current affairs	The online game, Pirate Fishing, casts you, the player, in the role of an investigative journalist who has to expose the multi-million dollar illegal fishing trade in West Africa. Juliana Ruhfus of People and Power spoke to us about what inspired her to #gamify current affairs. Click here to try the interactive game investigating Sierra Leone's illegal fishing trade: http://aje.io/dsrx * Have som…	0.0463318	2016-04-14T02:29:09.000Z	0.035995673	0.071508005	0.05719928	africa	africa	1
504	dhWcEQc9ilM	Morocco regional vote tests ruling party's popularity	Polls open in just a few hours time in Morocco's regional council elections. It is the first since the central government gave its regions greater autonomy. Al Jazeera's Hashem Ahelbarra reports from Tangiers how it's also seen as a major test of the popularity of the ruling party. Subscribe to our channel http://bit.ly/AJSubscribe Follow us on Twitter https://twitter.com/AJEnglish Find us on Fac…	0.0463732	2015-09-05T08:49:37.000Z	0.05991793400000001	0.01097043	0.021196842	europe	europe	6
505	3ruVEGwwtKM	Mandela's love for Indonesian batik shirts	Nelson Mandela's legacy will be remebered beyond Africa's borders. Many Indonesians remember him as the man who taught them to make peace. But there is one other thing Indonesians remember Mandela for. His love of traditional shirts known as batik. Al Jazeera's Step Vaessen reports from Jakarta.	0.0465029	2013-12-13T15:33:57.000Z	0.046502944000000004	0.11478123	0.02362407	africa	africa	1
506	5r3WAZI-2gg	Witness - Sepideh: Reaching for the Stars promo	​Astronomy enthusiast Sepideh challenges her family and strict traditions in rural Iran to pursue her dream of becoming an astronaut.​ - Subscribe to our channel: http://bit.ly/AJSubscribe - Follow us on Twitter: https://twitter.com/AJEnglish - Find us on Facebook: https://www.facebook.com/aljazeera - Check out our website: http://www.aljazeera.com/	0.0465846	2016-01-04T12:18:04.000Z	0.06144104	0.05575914	0.021830516	africa	africa	1
507	Qm1oHG4WOFE	How much will New Hampshire's 'independent' voters impact the US elections?	Voters in the US state of New Hampshire will choose their preferred presidential candidates on Tuesday. Independent voters who aren't dedicated to either the Republican or Democrat parties, could have a big say in who wins. In the northeast state, nearly 40 percent of voters identify themselves as independent. But as Alan Fisher reports, the belief that there's a huge number of voters to be swaye…	0.0466115	2016-02-08T22:42:49.000Z	0.046611544000000005	0.03484878	0.027445458	elections	politics	13
508	4sA2NEVPzc0	European leaders reach banking deal	Europe's political leaders have agreed on a strategy aimed at ending the cycle of economically weak nations attempting to bail out struggling banks on their own. There would be three so-called pillars of support - including a banking supervisor at the European Central Bank in Frankfurt - and the banks themselves would build up their own bailout fund of $75-billion. EU finance ministers now face t…	0.0466847	2013-12-20T05:09:29.000Z	0.046684694000000006	0.014530686999999999	0.06197524	europe	europe	6
509	MyDx4nshmB0	India votes in third phase of elections	Voters in India have been voting in one of the biggest days of the general election. More than one hundred million people were able to cast their ballot on Thursday. One of them was Delhi. The Indian capital is home to 17 million people.	0.0467187	2014-04-10T18:58:37.000Z	0.04671869	0.02392722	0.03833462	asia	asia	3
510	qLkE25n0jg8	Peru’s alpaca herders pin hopes on APEC meeting	The Asia-Pacific Economic Cooperation summit is taking place in Peru. The host nation wants to open up export markets for its small businesses, and poor Andean herders are among those hoping to benefit.	0.0467312	2016-11-17T16:39:16.000Z	0.046731237	0.061246246	0.048057052999999995	asia pacific	asia	3
511	NLqUpZVgZN4	Pakistani cinema hit by twin blasts	At least five people have been killed after two grenades were thrown into a packed cinema in Pakistan. The movie theatre was screening a Pashto language film and is located in the Kissa Khu Ani Bazaar area of Peshawar. More than 20 other people were injured. No one has claimed responsibility for the attack. Al Jazeera's Kamal Hyder reports from Islamabad.	0.0468385	2014-02-03T23:09:39.000Z	0.050335918	0.562779	0.07853385	asia	asia	3
512	TikogQYE3Xc	The Stream - Incarcerated infants	Subscribe to our channel http://bit.ly/AJSubscribe Follow The Stream and join Al Jazeera's social media community: This episode's story: http://stream.aljazeera.com/story/201406252028-0023872 FACEBOOK: http://www.facebook.com/AJStream TWITTER: https://twitter.com/AJStream GOOGLE+: http://google.com/+TheStream ****************************************­************ On The Stream: Raising babies in p…	0.0469207	2014-06-27T03:17:08.000Z	0.046920735	0.23754409	0.058864284	science & technology	science & technology	17
513	hUdCVzxCt_o	Technology aids voter registration in Malawi	Voters in Malawi's upcoming election can check if they are registered by sending a text message or SMS. Government officials say they are trying to ensure a credible voter roll. Al Jazeera's Haru Mutasa reports from Blantyre, Malawi.	0.0469981	2014-05-19T15:08:42.000Z	0.025455823	0.11203976	0.10938453	africa	africa	1
514	Y3th8P1rPRo	News Bulletin - 20:30 GMT update	Subscribe to our channel http://bit.ly/AJSubscribe The main headlines on Al Jazeera English, featuring the latest news and reports from around the world.At Al Jazeera English, we focus on people and events that affect people's lives. We bring topics to light that often go under-reported, listening to all sides of the story and giving a 'voice to the voiceless.' Reaching more than 270 million hous…	0.0469995	2013-10-31T20:22:13.000Z	0.020403428	0.029683022000000007	0.010673008	europe	europe	6
515	K34Q0oLp0VU	The Stream - The stream - Is tennis caught in the net of corruption?	On The Stream: The Stream looks at the relationship between betting and the ‘gentleman’s game’	0.0470711	2016-01-29T12:18:49.000Z	0.11189892	0.14614157	0.035022996	politics	politics	13
516	rTBGAVabzPg	People & Power - Romania's War on Corruption promo	People & Power investigates the extraordinary effort to rid Romania of corruption amid its powerful political and business elites.	0.0470955	2015-10-16T07:18:08.000Z	0.047095477999999996	0.34930485	0.2260749	corruption	politics	13
517	KgXENnuBgcQ	Venezuela protesters clash with riot police in Caracas	Riot police have fired tear gas at stone-throwing protesters in Venezuela's capital amid opposition demonstrations to pressure electoral authorities into allowing a recall referendum against President Nicolas Maduro. The opposition says Maduro, elected in 2013, is pushing the oil-producing country towards economic catastrophe. One recent opinion poll showed almost 70 percent of Venezuelans want M…	0.0471126	2016-05-12T11:37:41.000Z	0.04711257	0.23754409	0.10851652	politics	politics	13
518	h1xZM-9ZueI	The Cure - On The Trail of Sleeping Sickness: Democratic Republic of Congo (SPECIAL)	Subscribe to our channel http://bit.ly/AJSubscribe In this special episode of The Cure, emergency medic Dr Javid Abdelmoneim travels deep into the Democratic Republic of Congo to see how clinicians from the international medical organisation Medecins Sans Frontieres (MSF) are screening and treating patients in a bid to make elimination of the disease a reality.	0.0472095	2017-05-15T19:33:51.000Z	0.032501966	0.23020972	0.0708219	africa	africa	1
519	DcKM9CMzv40	Voting stations struggle in storm's aftermath	Subscribe to our channel http://bit.ly/AJSubscribe One million voters in New York live in areas where polling stations have been damaged or lost power after storm Sandy. The number is higher in New Jersey. Officials have been scrambling to get new voting stations up and running . Al Jazeera's Kristen Saloomey reports from New York. At Al Jazeera English, we focus on people and events that affect …	0.047261	2012-11-07T01:01:32.000Z	0.05103563	0.06195286	0.023778545	united states	us & canada	19
520	KSegwR4RWLQ	TechKnow - Extreme weather: Coincidence or climate change?	Extreme weather and climate events, such as heat waves, storms and droughts, have increased in recent decades, and they are becoming more frequent and more severe across the world. 'A lot of the research has shown that [weather is becoming more extreme]. As the globe starts to change, extremes may become the norm,' Nicholas Metz, a professor of geoscience at Hobart and William Smith Colleges in G…	0.0473917	2015-12-20T14:29:08.000Z	0.06898209	0.042855438	0.016612694	climate sos	environment & weather	5
521	_KCsXU5PAwg	US junkyard 'Old Car City' now a Museum	Cars which were once written off as scrap are being given a new lease of life after a junkyard owner created a museum in the US. Al Jazeera's Andy Gallacher has more. Subscribe to our channel http://bit.ly/AJSubscribe Follow us on Twitter https://twitter.com/AJEnglish Find us on Facebook https://www.facebook.com/aljazeera Check our website http://www.aljazeera.com/	0.047401	2016-04-08T01:56:49.000Z	0.047400992	0.123970784	0.036736052000000005	africa	africa	1
522	bB0hkHVdElU	North Korea deports detained South Korean citizen	Reports say Joo Won-moon, arrested in April for illegal entry, was repatriated through border truce village. AL Jazeera's Harry Fawcett reports from Seoul. Subscribe to our channel http://bit.ly/AJSubscribe Follow us on Twitter https://twitter.com/AJEnglish Find us on Facebook https://www.facebook.com/aljazeera Check our website http://www.aljazeera.com/	0.0474157	2015-10-05T10:24:58.000Z	0.04741575	0.05434962	0.11293425	north korea	asia	3
523	Gkhxo5rSdiQ	Desperate journeys: US exhibit highlights refugee life	An exhibit in Washington DC called “Forced from Home” is giving visitors an idea of what life is like for more than 65 million displaced people around the world. Al Jazeera's John Hendren reports from Washington, DC. - Subscribe to our channel: http://aje.io/AJSubscribe - Follow us on Twitter: https://twitter.com/AJEnglish - Find us on Facebook: https://www.facebook.com/aljazeera - Check our webs…	0.0474876	2016-10-02T08:23:43.000Z	0.047487552999999995	0.09387546	0.0046925787	united states	us & canada	19
524	_EsUwQpPFj4	Desperate Journeys: Search and rescue Doctors Without Borders on mission	The Aegean Sea route that many refugees have been using to reach Europe has virtually been closed by a controversial EU-Turkey deal. So now the central Mediterranean has once again become the dominant route to Europe. Al Jazeera's Mohamed Vall went on board a Doctors without Borders search and rescue boat, heading towards the Libyan coast. - Subscribe to our channel: http://aje.io/AJSubscribe - F…	0.0474905	2016-12-28T23:23:02.000Z	0.047490515	0.084220015	0.072046205	europe	europe	6
525	2qWasSnny3k	How did Al Jazeera rise to the challenge of covering the Nepal quake? #reVIEWebisode16	Subscribe to our channel http://bit.ly/AJSubscribe This week’s webisode examines how Al Jazeera rose to the challenge of covering the earthquake in Nepal, the network premier of People & Power's undercover investigation into the world of fake marriages and human trafficking in the UK (http://aje.io/egml), and your views on the channel’s Baltimore reporting. * Do you want to feature in our next we…	0.0475036	2015-05-04T22:45:34.000Z	0.060401294	0.10862066	0.08513543	media	media	11
526	gMxUNTFcay8	Empire - McAmerica: The Success Secrets of Brand USA promo	Empire examines the allure of ‘Brand America’ as American ‘soft power’ continues to be unmatched and unrivaled anywhere in the world. - Subscribe to our channel: http://bit.ly/AJSubscribe - Follow us on Twitter: https://twitter.com/AJEnglish - Find us on Facebook: https://www.facebook.com/aljazeera - Check our website: http://www.aljazeera.com/	0.0475781	2014-12-23T11:16:32.000Z	0.047578104	0.04048084	0.006924196600000001	united states	us & canada	19
527	PfZ6K2SbXLw	Snap shares surge 44% on market debut	It's one of the hottest tech companies to float on the US stock market in years. Snap Inc, the company behind the smartphone app Snapchat, raised $3.4 billion in its market debut. However, there are concerns as some analysts say the company is overvalued. Al Jazeera’s Gabriel Elizondo reports from New York City. - Subscribe to our channel: http://aje.io/AJSubscribe - Follow us on Twitter: https:/…	0.0476774	2017-03-03T12:05:27.000Z	0.06740223599999999	0.01576104	0.029125522999999997	business & economy	business & economy	4
528	4KG1TxRTpis	Dutch court: Shell can be liable for Nigeria spills	Nigerian farmers and fisherman have been told they can sue the oil giant Shell in a Dutch court. A judge in the Hague ruled that the multinational can be held legally responsible for alleged pollution by its subsidiary in Nigeria. The ruling means other Dutch-based companies operating around the world can also be sued. Shell says it's 'disappointed' by the ruling. Al Jazeera's Ahmed Idris reports…	0.0478516	2015-12-18T21:35:18.000Z	0.047851625999999994	0.3011959	0.13859078	africa	africa	1
529	2tUkb0Pzhtg	On Al Jazeera: Tunisia pays tribute to resort victims	Some of today's stories from our correspondents around the globe: 1. Tunisia pays tributes to those killed in beach resort attack. 2. Anxiety and fears grow among Greeks as debt deadline looms. 3. Years later, victims of Dhaka's Rana Plaza building collapse have yet to see justice. Subscribe to our channel http://bit.ly/AJSubscribe Follow us on Twitter https://twitter.com/AJEnglish Find us on Fac…	0.0478691	2015-06-29T23:07:29.000Z	0.036858752	0.079669595	0.15985899	africa	africa	1
530	k8wpt-YJUfo	World anti-doping agency to release second part of report	The scandal that's gripping world athletics is about to get worse. In a few hours time the world anti-doping agency will release the second part of it's report on doping and corruption within the sport The authors claiming the information will have far reaching consequences. Lee wellings reports. - Subscribe to our channel: http://bit.ly/AJSubscribe - Follow us on Twitter: https://twitter.com/AJE…	0.047918	2016-01-14T16:58:36.000Z	0.047917996	0.17987396	0.07210625	politics	politics	13
531	4Vr8-bRnqMM	Mali capital hit by deadly floods	At least 24 people have been killed in flash floods caused by torrential rain in the Malian capital Bamako, a government official said. Thousands were also made homeless as the Niger river burst its banks, destroying around 100 houses in several hours of heavy rain on Wednesday in the city of around two million people, Alassane Bocoum, the national director of social development, said on Thursday…	0.0479263	2013-08-30T23:59:56.000Z	0.04792629	0.23754409	0.18788877	weather	environment & weather	5
532	RPrf0E-Eqao	The Stream - Colombia’s potential for peace	Subscribe to our channel http://bit.ly/AJSubscribe Follow The Stream and join Al Jazeera’s social media community: This episode’s story: http://stream.aljazeera.com/story/201510011615-0025022 FACEBOOK: http://www.facebook.com/AJStream TWITTER: https://twitter.com/AJStream GOOGLE+: http://google.com/+TheStream **************************************************** On The Stream: Can a peace deal end…	0.0480164	2015-10-02T01:40:11.000Z	0.048016414	0.046048228	0.0507123	media	media	11
533	luRK1rUfK0w	El Nino: Drought threatens Guatemala's rural population	Nearly one million Guatemalans are at risk of going hungry. The weather phenomenon, El Nino, is being blamed for a lack of rain over the past two years. Rural families are running low on food, and some now depend on food aid. Al Jazeera’s David Mercer reports from Guatemala. - Subscribe to our channel: http://aje.io/AJSubscribe - Follow us on Twitter: https://twitter.com/AJEnglish - Find us on Fa…	0.0480676	2017-02-27T20:41:15.000Z	0.021083381	0.083848245	0.054046497	africa	africa	1
534	FI4tnmIIypo	Artscape - The New African Photography: Barbara Minishi - Promo	Subscribe to our channel http://bit.ly/AJSubscribe Subscribe to our channel http://bit.ly/AJSubscribe Barbara Minishi follows the campaign of presidential candidate Martha Karua for her project on Kenyan women, which aims to represent a wide range of women all wearing the same red dress, as a symbol of unity and national identity. She is now one of Kenya's top fashion photographers, but Minishi s…	0.0481808	2013-04-30T03:37:51.000Z	0.048180833	0.04995892	0.012026883	media	media	11
535	7VhfsYxsFx0	Al Jazeera staff due in court for appeal	An Egyptian court will hear an appeal in the case of three Al Jazeera English journalists jailed since last year. Al Jazeera's Andrew Simmons reports.	0.0482336	2015-01-01T11:03:54.000Z	0.048233635999999996	0.042865377	0.03385249	egypt	middle east	12
536	XI0IbKPbD5E	Rival New York ad agencies wage post-it notes war	If you're in New York, look up and you might see some interesting window displays in the form of post-it notes. Al Jazeera’s Kristen Saloomey reports from New York. - Subscribe to our channel: http://bit.ly/AJSubscribe - Follow us on Twitter: https://twitter.com/AJEnglish - Find us on Facebook: https://www.facebook.com/aljazeera - Check our website: http://www.aljazeera.com/	0.0484015	2016-05-20T03:34:26.000Z	0.038477488	0.12515567	0.014262298999999999	united states	us & canada	19
537	Bi5xbY-J4uI	Call for constitutional change in Myanmar	A small group of protesters in Myanmar's former capital, Yangon, have urged the government to change the country's constitution to allow opposition leader Aung San Suu Kyi to run for president next year. Article 59 of Myanmar’s constitution prevents a person from running for president if they have a spouse or child with foreign citizenship. Suu Kyi's two sons by late husband Michael Aris are Brit…	0.0485051	2014-01-06T18:49:14.000Z	0.04850511	0.04126586	0.033357553	myanmar	asia	3
538	qzroGgs6A30	Political violence ahead of Zanzibar's re-run election	As Zanzibaris go to the polls for a controversial re-run of presidential elections that were held in October, Some Zanzibaris have told Al Jazeera they have been victims of political violence, and they worry the rerun could bring more. Malcolm Webb reports. -Subscribe to our channel http://bit.ly/AJSubscribe Follow us on Twitter https://twitter.com/AJEnglish Find us on Facebook https://www.facebo…	0.048582	2016-03-20T14:54:19.000Z	0.04858201400000002	0.45710272	0.13247608	africa	africa	1
539	IDujgAV2NZY	US 2016: How much does the economy matter? - Counting the Cost	The race for the White House has officially started and many voters in the United States are concerned about the state of the economy and the future direction the country will take. When Janet Yellen, the head of the US Federal Reserve, gave her six-monthly monetary policy report to Congress recently, she said: 'Financial conditions in the United States have recently become less supportive of gro…	0.0488379	2016-02-16T20:29:32.000Z	0.058224864	0.01668461	0.048830934000000006	business & economy	business & economy	4
540	_dxLBUOwMa4	What impact can third-party candidates have on the US presidential election? - The Stream	What impact will third-party voters have on the election? Join @AJStream's Twitter chat w/ #3rdPartyStream Subscribe to our channel http://bit.ly/AJSubscribe Follow us on Twitter https://twitter.com/AJEnglish Find us on Facebook https://www.facebook.com/aljazeera Check our website: http://www.aljazeera.com/	0.0489169	2016-08-03T10:43:33.000Z	0.03787272	0.06130141	0.05688541	africa	africa	1
541	iQBdlpDcJNY	Crimea politics invade the football pitch	The ongoing Crimean crisis is already affecting the region's top football teams. Tavria Simferopol and FC Sevastopol will finish this season in Ukraine's league, but could be forced to compete in the Russian league in the next. Some political figures are also questioning Russia's hosting of the 2018 World Cup. The Russian president, Vladimir Putin, signed into law a treaty on Friday, formally mak…	0.0489447	2014-03-22T13:31:14.000Z	0.048944738	0.36708084	0.030056318	europe	europe	6
542	YAE78iHCIqs	More anchovies off California coast attracting wildlife	An explosion in the number of small fish off the Californian coast has made for an exciting wildlife spectacle. The increase in food supply has attracted a large number of seals and whales. Al Jazeera's Jacob Ward reports.	0.0489489	2013-12-11T16:53:16.000Z	0.08834614	0.1498661	0.12677905	united states	us & canada	19
543	3fLXMQ0ApdY	Tutu's Children - Episode 3 - Getting to the heart of leadership	Desmond Tutu leads an experiment to build a network of inspirational leaders to tackle Africa's most stubborn problems.	0.0489849	2013-04-22T13:36:39.000Z	0.040153485	0.12322484	0.153658	africa	africa	1
544	FeHAsUtsP-8	Chile floods leave more than one million without water	Debris from days of torrential rains have blocked the intake system in the Chilean capital, cutting off water supply to more than one million people. Santiago's water company says it hopes to re-establish supplies in the coming hours. Al Jazeera's Lucia Newman reports from Santiago. - Subscribe to our channel: http://aje.io/AJSubscribe - Follow us on Twitter: https://twitter.com/AJEnglish - Find …	0.0490203	2017-03-02T05:29:09.000Z	0.06211232	0.1538771	0.029528323999999998	weather	environment & weather	5
545	m0ov8n6TMOM	US aims to save historic audio recordings	They are the sounds of a generation – the recorded history of a nation. But there’s a danger some could be lost for ever. The US Library of Congress has embarked on a massive project to preserve, catalogue and digitize some of the oldest recordings in the world. It is challenge of time, technology and simple wear and tear. Al Jazeera’s Alan Fisher reports.	0.0490322	2014-05-04T15:10:22.000Z	0.049032234	0.030178958999999998	0.042426433	asia	asia	3
546	Nj37AalAo2c	California caviar taking on Russia and Iran	US' California caviar is a booming business, with the state's sturgeon farmers profiting from the downfall of Caspian Sea caviar. An industry that was previously monopolised by Iran and Russia which produced 95 percent of world's caviar supply, California sturgeon fish farmers are set to change that. Sturgeon have been swimming around for 250 million years, long before the dinosaurs or, needless …	0.049131	2014-01-06T19:34:31.000Z	0.04913101	0.18197492	0.041792702	united states	us & canada	19
547	UqWScCZYVW0	Viewfinder - Asia - extra: My father, my mother	Subscribe to our channel http://bit.ly/AJSubscribe Trying to combat the soaring divorce rates in Taiwan, one marriage consultant faces the toughest challenge of her life. At Al Jazeera English, we focus on people and events that affect people's lives. We bring topics to light that often go under-reported, listening to all sides of the story and giving a 'voice to the voiceless.' Reaching more tha…	0.0491492	2013-08-12T11:30:22.000Z	0.049149152	0.45671272	0.009801246	media	media	11
548	00eyOApxRkc	Soapbox Mexico - Breaking taboos	Can soap operas help tackle stigma and discrimination related to HIV/AIDS in Mexico?	0.0491732	2013-12-17T12:42:57.000Z	0.0491732	0.562779	0.21386698	latin america	latin america	10
549	lJHIKineROU	Featured Documentary - 21 Up South Africa Part 1 promo	Subscribe to our channel http://bit.ly/AJSubscribe In 2006 we revisit the South African children filmed at age 7 and 14 to meet them at age 21, when poverty, race and babies feature in their lives	0.0492287	2016-03-06T02:39:17.000Z	0.06776259	0.05687591	0.045016944	africa	africa	1
550	4hY6o-4J-8w	Sierra Leone musician accuses government of censorship	A musician known for criticising Sierra Leone's government says he's been denied a chance to perform a free concert. Emmerson, the popular musician, has sung about unemployment and missing Ebola response funds. But the government denies silencing him, as Al Jazeera's Nina Devries reports from the capital Freetown. - Subscribe to our channel: http://aje.io/AJSubscribe - Follow us on Twitter: https…	0.0492864	2016-07-17T08:10:09.000Z	0.04928639	0.23754409	0.031534667999999995	africa	africa	1
551	Z2ZnTav23q8	Air of distrust hangs over Anbar refugees in Baghdad	Imran Khan visits a camp for displaced people in the Iraqi capital, Baghdad. There, he says, an air of distrust hangs over both refugees and city residents. More on our website: http://aljazeera.com Follow us on Twitter: http://twitter.com/AJEnglish Subscribe to our channel: http://bit.ly/AJSubscribe Find us on Facebook: http://facebook.com/aljazeera	0.0493439	2015-05-06T14:19:39.000Z	0.049343872999999996	0.30689317	0.036793508	iraq	middle east	12
552	PKiX32k95Pw	Video game makers convene in the UK	Some of the world's most experimental video game makers are in London for a conference organised by the Victoria and Albert Museum. They will be exchanging views on the future of the video-game industry and how to incorporate virtual reality technology. Al Jazeera's Jessica Baldwin reports from London. Subscribe to our channel http://bit.ly/AJSubscribe Follow us on Twitter https://twitter.com/AJE…	0.0493653	2016-11-26T18:45:40.000Z	0.04265076	0.038312133	0.025229076	europe	europe	6
553	xR_CieMZoBc	Talk to Al Jazeera - Jose Mujica promo	Subscribe to our channel http://bit.ly/AJSubscribe Jose Mujica, The President of Uruguay Talks to Al Jazeera.	0.0493862	2013-10-24T11:29:32.000Z	0.049386244	0.10429657	0.051953316	media	media	11
554	LSuzscZNDEE	US coach promotes women’s wheelchair basketball in Gaza	Sport can be a force for good and sometimes change. A perfect example of that is Palestine first ever women's wheelchair basketball team, which is attempting to change the perception of those with disabilities with the help of an American wheelchair basketball star. Al Jazeera’s Imtiaz Tyab reports from Gaza. - Subscribe to our channel: http://bit.ly/AJSubscribe - Follow us on Twitter: https://tw…	0.0495205	2016-06-16T19:57:30.000Z	0.04952045	0.16606644	0.032232538	united states	us & canada	19
555	0nOB_cFWyc0	Listening Post - Feature: From internet giants to media tycoons	Why are dot-com billionaires pumping money into the news business, an industry that has suffered in the internet era?	0.0495396	2014-01-07T07:31:27.000Z	0.04953957	0.055633638	0.16210209	united states	us & canada	19
556	mHY5wNT_KFM	News: UN General Assembly promo	Subscribe to our channel http://bit.ly/AJSubscribe News: UN General Assembly promo	0.0497598	2014-09-17T15:27:56.000Z	0.049759757	0.037418187	0.02875601	middle east	middle east	12
557	NfcdWtQBSG4	'SumbongKo' civic campaign, Guerrilla Benchers in London, Instagramming Carnival	Subscribe to our channel http://bit.ly/AJSubscribe At Al Jazeera English, we focus on people and events that affect people's lives. We bring topics to light that often go under-reported, listening to all sides of the story and giving a 'voice to the voiceless.' Reaching more than 270 million households in over 140 countries across the globe, our viewers trust Al Jazeera English to keep them infor…	0.0498445	2013-02-14T08:55:12.000Z	0.049844495999999995	0.3455253	0.013168547	europe	europe	6
558	b-ekEZTypF8	WTO accused of failing to assist developing nations	Ministers meeting in Kenya say the World Trade Organization must deliver on its promise to knock down trade barriers. They say it has failed to assist developing nations who stand to gain most from access to markets in more industrialised nations. Al Jazeera’s Malcolm Webb travelled to Makueni in the east of the country to see what impact current trade policies have on farmers. - Subscribe to our…	0.0498544	2017-04-08T03:54:06.000Z	0.049854413	0.1006825	0.018700443	africa	africa	1
559	S95c5XndrlU	Rooftop urban farming feeds South Africa’s poor	Rooftops of some high-rise buildings in South Africa's city of Johannesburg are being used for urban farming projects. Besides making the buildings eco-friendly, the initiatives are also providing an alternative source of food for poor families living in the area. Al Jazeera’s Haru Mutasa reports from Johannesburg. - Subscribe to our channel: http://aje.io/AJSubscribe - Follow us on Twitter: http…	0.0498643	2018-01-20T13:01:03.000Z	0.049693488	0.16805792	0.020756563000000002	africa	africa	1
560	6XbJrMBErnU	Arctic sea ice continues to shrink	Arctic sea ice shrank to its second lowest level ever recorded by scientists. They say it's another threatening sign of global warming. Every year, summer sea ice is measured or in recent years, the lack of it. Scientists say there are no signs of recovery. Al Jazeera's science editor Tarek Bazley explains. - Subscribe to our channel: http://aje.io/AJSubscribe - Follow us on Twitter: https://twit…	0.0498875	2016-09-16T13:50:30.000Z	0.050515104000000005	0.012952161	0.04872879	science & technology	science & technology	17
561	3riXt_2fWf4	World Chess Championship kicks off in New York City	The World Chess Championship gets underway this week in New York City. And for the first time ever, the classic game of chess is going high-tech. Chess fans who can't be there in person will be able to watch the matches in virtual reality. But, as Gabriel Elizondo reports, not everyone is embracing the new trend. Subscribe to our channel http://bit.ly/AJSubscribe Follow us on Twitter https://twit…	0.0499425	2016-11-12T21:48:50.000Z	0.04994251	0.08689328	0.022834952999999998	united states	us & canada	19
562	iwb2-2GRY2k	London's Tate Modern museum opens performance space	It's one of the most visited modern art museums in the world, and after six years of construction the Tate Modern in London has doubled its exhibition space. Since the transformation of the derelict power station in 2000, the gallery has welcomed five million visitors a year. The new building is expected to draw even bigger crowds, with more work from women and international artists. Al Jazeera's…	0.0500613	2016-08-15T06:51:44.000Z	0.07494313	0.022674367	0.009192945	arts & culture	arts & culture	2
563	VTa1GUlRGEA	Murderball makes its Parapan Am debut	Athletes from 28 countries across the Americas are gathering in the Canadian city of Toronto for the 5th Parapan Am Games, where the competitors are people with disabilities. For the first time, the sport known as Murderball, or wheelchair rugby, will be featured. Canadians invented this sport and they’ve a won a lot of medals over the years. Before a home-town crowd they’ll be going for gold aga…	0.050103	2015-08-11T14:08:07.000Z	0.050103042	0.1704511	0.055113602000000005	europe	europe	6
564	9QTgJ4E2pZg	UK doctors tap medical app for chronically ill	Subscribe to our channel http://bit.ly/AJSubscribe Patients with chronic illnesses spend days in doctors' offices, visiting specialists and having tests done. As part of Al Jazeera's 'Tapping into Technology'' series, Jessica Baldwin reports on a new smartphone application that is helping patients and doctors keep better track of their treatment. At Al Jazeera English, we focus on people and even…	0.0501773	2012-06-17T00:45:58.000Z	0.050177302	0.30118629999999996	0.0073943487	media	media	11
565	BYI_vXQfrJQ	Election campaigning in indigenous Bolivia	Bolivians go to the polls to elect new governors. Felipa Huanca, from the Aymara community, is standing as governor for La Paz - trying to wrest control from the opposition. She quotes a long struggle against discrimination. Al Jazeera's Daniel Schweimler reports from La Paz.	0.0501863	2015-03-29T13:21:13.000Z	0.05018628	0.061836995	0.14155324	politics	politics	13
566	2-5R2QzUe2o	23 new MERS cases detected in South Korea	23 new cases of Middle East Respiratory Syndrome (MERS) have been detected in South Korea - the biggest spike in cases there, in a single day. Six people have died from the virus, and in a bid to contain the spread officials have closed schools in the capital. Al Jazeera's Harry Fawcett has more from Seoul.	0.0503028	2015-06-08T17:33:54.000Z	0.050302825999999995	0.07990338	0.06950962	asia pacific	asia	3
567	2nglmon5Kkg	New law 'excludes and controls' Cambodia's NGOs	Cambodia's National Assembly is set to pass controversial legislation that critics say would limit the actions of NGOs in the country. After the genocidal era of the Khmer Rouge, NGOs have been vital in re-building Cambodia. But with so many organizations now operating, the government wants to clamp down on so-called rogue operators. Opposition parties suspect Cambodia’s long-serving Prime Minist…	0.0503247	2015-07-14T09:21:43.000Z	0.07888041	0.132244	0.11932313	politics	politics	13
568	7YidLtV2zEk	Kenya university attack victims still trying to cope	Families struggle to move on after Garissa University attack, where 147 people, mostly students, were killed by al-Shabab. Al Jazeera's Catherine Soi reports. Subscribe to our channel http://bit.ly/AJSubscribe Follow us on Twitter https://twitter.com/AJEnglish Find us on Facebook https://www.facebook.com/aljazeera Check our website http://www.aljazeera.com/	0.050331	2015-12-27T21:16:14.000Z	0.050330993	0.16254489	0.24449377	africa	africa	1
569	XW2X2MavSD0	South Sudan’s displaced still afraid of returning home	Thousands of people displaced by conflict in South Sudan are still afraid of returning o their homes despite a ceasefire - one that can best be described as fragile. Many civilians say their homes have been vandalised and soldiers are still patrolling their neighbourhoods. Al Jazeera’s Catherine Soi reports from Juba. - Subscribe to our channel: http://aje.io/AJSubscribe - Follow us on Twitter: h…	0.0503673	2016-07-19T05:49:37.000Z	0.09024304	0.08993135	0.055434495	africa	africa	1
570	fxvcPijoBSU	Authorities close third day of search for missing Malaysian plane	The third day of searching for a missing Malaysian passenger plane has come to an end with no sign of the jet or its 239 passengers. But investigators say they have more information about the identities of the passengers who were travelling using stolen passports. Malaysian police Inspector General said they have identified one of the two men and he is not Malaysian. But there are still no answer…	0.0504422	2014-03-11T13:50:53.000Z	0.050442192999999996	0.23754409	0.08419774	europe	europe	6
571	GLRrX6lWE3U	First Zika case in Haiti amid a crumbling health system	Haiti has identified its first case of the birth defect microcephaly linked to the Zika virus. The health ministry also confirmed it had identified another 14 cases of microcephaly, but hasn't yet linked them to Zika. The announcement came as doctors across Haiti continue a strike they've been on since March, in protest over low wages, crumbling facilities and a lack of basic medical supplies. Al…	0.0504661	2016-08-17T12:57:17.000Z	0.050466082999999995	0.17889756	0.0330527	health	health	7
572	T5i8d_z0EaM	Egypt court adjourns trial of Al Jazeera staff	In Egypt, the trial of three Al Jazeera English journalists, who have been in jail now for almost three months, has been adjourned again. Al Jazeera's Anita McNaught reports.	0.0504941	2014-03-24T23:09:18.000Z	0.050494052000000005	0.060966585	0.08320582	egypt	middle east	12
573	0gKtF4UCPhU	South2North - Media Freedom promo	Subscribe to our channel http://bit.ly/AJSubscribe South2North explores the popularity of online news and what this means for traditional journalism, as well as the future of Media freedom.	0.050571	2013-10-23T16:10:02.000Z	0.05057095	0.11326102	0.010975491	media	media	11
574	DD5B3vcso64	News Bulletin - 14:35 GMT update	Subscribe to our channel http://bit.ly/AJSubscribe The main headlines on Al Jazeera English, featuring the latest news and reports from around the world. Subscribe to our channel http://bit.ly/AJSubscribe	0.0505759	2014-03-31T17:10:25.000Z	0.050575855999999995	0.029683022000000007	0.0154602295	media	media	11
575	3JpoMnJz7zM	Peru floods put thousands in danger	Unseasonal rain in Peru has forced one region to declare a state of emergency. Police have closed bridges for fear of collapse in the city of Piura, the regional capital. With the Piura River overflowing, 200,000 Peruvians living downstream are in danger. A phenomenon known as coastal Nino is being blamed for the flooding. It is triggered when sea winds slow down, causing the ocean to warm up. Al…	0.0505804	2017-03-12T08:56:24.000Z	0.050580442	0.45842114	0.040635236	africa	africa	1
576	gb1v7EbVy8s	Indonesia reefs under climate change threat	Water which is too warm is threatening coral reefs. They're suffering from bleaching. Instead of their normal myriad of colours, they're turning completely white. Steve Chao has been seeing how one of the world's most important coral reefs is facing destruction in Indonesia.	0.0505906	2015-02-12T15:40:37.000Z	0.050590612	0.16274136	0.14776425	environment	environment & weather	5
577	DxUt3PwD0EU	US Presidential Elections - Sept 2016 Debates promo	Al Jazeera's coverage of the first of the US presidential Elections Debates on Sept 26th, 2016. - Subscribe to our channel: http://aje.io/AJSubscribe - Follow us on Twitter: https://twitter.com/AJEnglish - Find us on Facebook: https://www.facebook.com/aljazeera - Check our website: http://www.aljazeera.com/	0.0506474	2016-09-20T17:34:49.000Z	0.05064743	0.06563575	0.0043549757	africa	africa	1
578	PoHpNzPPbYY	Your views on Al Jazeera’s xenophobia coverage & BP oil spill ignites tech activism | reVIEW	Subscribe to our channel http://bit.ly/AJSubscribe Your thoughts on Al Jazeera’s xenophobia coverage and Earthrise looks at how the BP oil spill ignited a DIY tech revolution among community activists. * Do you want to feature in our next webisode? Want to share your thoughts on something you have read or watched on Al Jazeera English? Send us a video comment: http://aljvideo.weebly.com/ YOUR sho…	0.0507537	2015-04-26T02:12:01.000Z	0.050753652999999996	0.35288942	0.126881	media	media	11
579	1kc9CDzbEEk	Oscars nominees announced in Hollywood	The nominations for this year's Oscars have been announced at a ceremony in Hollywood. There were some predictable choices, but also some suprises. Al Jazeera's Phil Lavelle reports from London.	0.0507609	2015-01-16T14:06:12.000Z	0.050760914000000004	0.01988056	0.024806714	europe	europe	6
580	6rgPqFL4aJg	Talk to Al Jazeera - Ali Jannati: 'Unblocking social media in Iran'	Subscribe to our channel http://bit.ly/AJSubscribe The Islamic Republic's culture minister discusses political change, media freedom and Iran's role in the region.	0.0508436	2014-01-15T08:13:45.000Z	0.04514129	0.06674177	0.022444978	arts & culture	arts & culture	2
581	ODvcOnWqRnc	Bangladesh police kill deadly café attack suspect	Police in Bangladesh say they have killed the main suspect behind last month's attack on a cafe that killed 22 people. Security forces raided a house outside the capital Dhaka, and also killed two others. Al Jazeera’s Osama Bin Javaid reports. - Subscribe to our channel: http://aje.io/AJSubscribe - Follow us on Twitter: https://twitter.com/AJEnglish - Find us on Facebook: https://www.facebook.com…	0.0508522	2016-08-27T21:10:05.000Z	0.1362174	0.4553178	0.17479151	asia	asia	3
582	CwPSYjIuXwU	African cinema makes its mark at Berlin Film Festival	When it comes to African cinema, what the rest of the world sees is often Nigeria's Nollywood and foreign-produced dramas. But with so much young talent going unseen, the Berlin Film Festival is a chance for the next generation of film-makers to make their mark. Al Jazeera’s Nadim Baba reports from the festival. - Subscribe to our channel: http://aje.io/AJSubscribe - Follow us on Twitter: https:/…	0.0509549	2017-02-18T12:27:40.000Z	0.0401624	0.04202378	0.013881183	africa	africa	1
583	cp6k34BnkDA	earthrise - Season 7 Coming Soon promo	Subscribe to our channel http://bit.ly/AJSubscribe earthrise explores solutions to the environmental challenges we all face, taking an upbeat look at ecological, scientific, technological and design projects the world over. Subscribe to our channel http://bit.ly/AJSubscribe Follow us on Twitter https://twitter.com/AJEnglish Find us on Facebook https://www.facebook.com/aljazeera Check our website …	0.051	2015-03-17T10:58:35.000Z	0.051000014	0.0672418	0.013542637	africa	africa	1
584	BUxCdcqqfmk	Nigerian writers find creative ways to sell their books	In Nigeria, there's a growing number of authors, but not enough publishers. Some companies are taking Nigerian books abroad to help boost writing in the country. Al Jazeera's Yvonne Ndege reports form Abuja. - Subscribe to our channel: http://bit.ly/AJSubscribe - Follow us on Twitter: https://twitter.com/AJEnglish - Find us on Facebook: https://www.facebook.com/aljazeera - Check our website: http…	0.0510203	2016-06-06T14:57:13.000Z	0.10072401	0.23396142	0.027459307000000002	africa	africa	1
585	n-Wt0S8QyEc	Rebel Education - Early Learning Mexico	A school in Mexico stresses the importance of early education through a rigorous curriculum for kids as young as 2 with astonishing results. - Subscribe to our channel: http://aje.io/AJSubscribe - Follow us on Twitter: https://twitter.com/AJEnglish - Find us on Facebook: https://www.facebook.com/aljazeera - Check our website: http://www.aljazeera.com/	0.0510325	2016-12-28T18:15:15.000Z	0.051032547000000004		0.013309106000000001	latin america	latin america	10
586	QUqBcdU8sL0	Battle for Mosul: Civilians evacuated as Iraqi forces advance	The district of Gogjali at the eastern entrance to Mosul had been under ISIL rule for two years, before being recently retaken by Iraqi forces. Civilians are now being told to leave as it will take time to secure the area. Al Jazeera's Stefanie Dekker reports from Erbil. - Subscribe to our channel: http://aje.io/AJSubscribe - Follow us on Twitter: https://twitter.com/AJEnglish - Find us on Facebo…	0.051063	2016-11-03T07:12:54.000Z	0.05106295	0.03594146	0.011583468000000001	battle for mosul	war & conflict	20
587	qS5tcNWsDNw	African troops retakes Nigeria town from Boko Haram	Boko Haram fighters have lost control of the Nigeria's Damasak. African troops have seized the town, and say over 200 rebels were killed in the assault. Al Jazeera's Yvonne Ndege reports. More on our website: http://aljazeera.com Follow us on Twitter: http://twitter.com/AJEngligh Subscribe to our channel: http://bit.ly/AJSubscribe Find us on Facebook: http://facebook.com/aljazeera	0.0510666	2015-03-20T18:01:54.000Z	0.010814561499999998	0.23754409	0.13339299	africa	africa	1
588	y2J9x7ZqeR4	Inside Story - How has ICRC's role changed over the years?	The International Red Cross and Red Crescent's mission is to help victims of armed conflicts. Presenter: Mike Hanna Guests: Bertrand Taithe, executive director of the humanitarian and conflict response institute at the University of Manchester. Dhananjayan Sriskandarajah, secretary general of CIVICUS, the World Alliance for Citizen Participation. David Forsythe, professor emeritus of political sc…	0.0510995	2016-12-30T16:24:46.000Z	0.06993213	0.032035086000000004	0.014046333	science & technology	science & technology	17
589	ehjeI0bYmVE	Meeting Colombia's FARC rebels during their final days	The Colombian government is close to signing a peace deal with FARC rebel forces, potentially ending their 51 year-old conflict. Alessandro Rampietti gained rare access to a major camp where rebels are gathering in what could be their last days. Subscribe to our channel http://bit.ly/AJSubscribe Follow us on Twitter https://twitter.com/AJEnglish Find us on Facebook https://www.facebook.com/aljaze…	0.051103	2015-12-16T07:31:12.000Z	0.045767404000000005	0.1199808	0.10359279	war & conflict	war & conflict	20
590	c7-Kjse7-aA	Sport changing Thai inmates lives for better	Subscribe to our channel http://bit.ly/AJSubscribe Subscribe to our channel http://bit.ly/AJSubscribe A sports competition with a difference is underway in Thailand. 'Sport behind bars' involves prisoners from around the country coming together in the capital Bangkok. The initiative aims to provide inmates with skills and attributes they can use on the outside. Al Jazeera's Wayne Hay reports from…	0.0511755	2013-07-18T15:21:59.000Z	0.051175497	0.048827574000000006	0.01389661	media	media	11
591	D6HAscXLUDY	Outsourcing Torture - One of the torture methods used in Roumieh prison	Read our interactive: http://interactive.aljazeera.com/aje/2015/outsourcingtorture/index.html Three Muslim Danish citizens reveal how they were asked to cooperate with Danish intelligence services. Their stories point to what could be a hidden role for Denmark and Lebanon in a new form of rendition: the outsourcing of torture. Subscribe to our channel http://bit.ly/AJSubscribe Follow us on Twitte…	0.0512396	2016-09-26T07:12:39.000Z	0.051239584000000005	0.30133072	0.03460452	human rights	human rights	8
592	vbTNMQHTxSA	Life Apps - Favela Farm	Can a Brazilian digital design student develop an app that could benefit those living in some of Rio's largest favelas?	0.0512658	2014-07-19T16:33:43.000Z	0.0512658	0.10844855	0.02478387	business & economy	business & economy	4
593	gjaYUJiwNlM	Peru election: Pedro Kuczynski holds slight lead as votes counted	An early vote count shows centre-right economist Pedro Kuczynski with a slight lead over Keiko Fujimori in Peru's presidential election. And though the final result is still some time away, his supporters are already celebrating. Al Jazeera's Mariana Sanchez reports from Lima. - Subscribe to our channel: http://bit.ly/AJSubscribe - Follow us on Twitter: https://twitter.com/AJEnglish - Find us on …	0.0512714	2016-06-06T11:10:10.000Z	0.051271442	0.030666154	0.017004848	africa	africa	1
594	u0ufakt0kPU	India’s declining Parsi population - Highlight	Subscribe to our channel http://bit.ly/AJSubscribe Is the community under threat of extinction? Stream guest Shireen Havewala shares what makes up the fabric of the Parsi community in India, watch the full episode: http://bit.ly/1FoUqeo At Al Jazeera English, we focus on people and events that affect people's lives. We bring topics to light that often go under-reported, listening to all sides of …	0.0512941	2014-11-27T05:11:29.000Z	0.051294137000000004	0.11276770400000001	0.04113737	asia	asia	3
595	CHzOHtqgElA	Lebanon: Syrian refugee brothers draw on art for survival	Having escaped the war in Aleppo, brothers Mohamed Ali and Nasser Darwish are among the more than one million Syrian refugees struggling to survive in Lebanon. The boys, who live in a van with their father, are making money selling their postcard-sized drawings on the streets of Lebanon’s capital, Beirut. Al Jazeera's Natasha Ghoneim reports from Beirut. - Subscribe to our channel: http://aje.io/…	0.0513156	2016-07-04T09:54:30.000Z	0.051315647	0.08099801	0.03650671	lebanon	middle east	12
596	3waFz2TqsNQ	Venezuela opposition claims enough support for Maduro vote	Opponents of socialist leader say they have the 1.3 million signatures needed to hold a referendum deciding President Nicolas Maduro's future. Al Jazeera's Virginia Lopez reports from Barlovento. - Subscribe to our channel: http://aje.io/AJSubscribe - Follow us on Twitter: https://twitter.com/AJEnglish - Find us on Facebook: https://www.facebook.com/aljazeera - Check our website: http://www.aljaz…	0.0513435	2016-06-25T14:08:00.000Z	0.051343497	0.12905082	0.025649172999999997	africa	africa	1
597	qKFiUvpoUCk	Rio protests turn violent over fare hikes	Commuters were caught up in violence at Rio de Janeiro's main train station as protesters vented their anger over bus fare hikes, the same issue that ignited mass demonstrations last year. The renewal of violence is causing concern ahead of Brazil's World Cup in June. Al Jazeera’s Gabriel Elizondo reports from Sao Paulo.	0.0513695	2014-02-07T19:02:26.000Z	0.051369492	0.1976885	0.10441123	latin america	latin america	10
598	qs60YfqPXCc	Lifelines - Cured leprosy sufferers talk about stigma	Subscribe to our channel http://bit.ly/AJSubscribe Subscribe to our channel http://bit.ly/AJSubscribe Another sufferer shares that after she showed signs of leprosy her mother told her that she should die & bought some poison for her to drink.Thankfully attitudes towards leprosy are changing but there is still much to do if the stigma is to be dealt with. Lifelines is an eight-part documentary se…	0.0514195	2014-05-08T13:03:09.000Z	0.051419493	0.15889797	0.04631402	media	media	11
599	d5VPmoM-MCQ	Al Jazeera World - Shattered Dreams promo	Subscribe to our channel http://bit.ly/AJSubscribe The story of Bangladeshi students travelling to the UK in anticipation of a prestigious education only to find the reality is quite different.At Al Jazeera English, we focus on people and events that affect people's lives. We bring topics to light that often go under-reported, listening to all sides of the story and giving a 'voice to the voicele…	0.0514372	2014-09-11T10:31:50.000Z	0.05143724	0.09512622	0.011667972	europe	europe	6
600	lIHX0hLyt2U	Cars of the future showcased in Detroit	The cars of the future are on show in Detroit - or at least parts of them are. The city's hosting the North American International Auto Show - where designers are displaying their new ideas. But drivers will have to wait to get behind the wheel. Al Jazeera's John Hendren reports from Detroit. - Subscribe to our channel: http://bit.ly/AJSubscribe - Follow us on Twitter: https://twitter.com/AJEngli…	0.0514406	2016-01-15T05:44:56.000Z	0.07532253	0.006281194300000001	0.031591657999999995	united states	us & canada	19
601	KcHkakXUv6Q	Mali vote goes to run-off	Mali's presidential election will go to a second round on August 11, with no candidate securing a majority in the landmark poll, the government has said. Former prime minister Ibrahim Boubacar Keita came first in Mali's presidential election on Sunday, but he will face Soumaila Cisse, the former finance minister, in a run-off after he failed to secure an outright majority, the government said on …	0.0516102	2013-08-03T08:48:28.000Z	0.05161024	0.31846490000000005	0.029860621	africa	africa	1
602	ZFaOVBV82r8	Biggest storm of the year slams Philippines	One of the most powerful storms on record is battering the Philippines. More than a hundred thousand people have been evacuated from the path of Typhoon Haiyan. Widespread damage is expected. Al Jazeera's Bhanu Bhatnagar reports.	0.0516134	2013-11-08T09:56:48.000Z	0.051613442999999995	0.19962949	0.031001065	us & canada	us & canada	19
603	kHgSwFJsgbg	Dilma Rousseff trial causes deep divisions in Brazil	Brazil’s former finance minister Nelson Henrique Barbosa has defended Dilma Rousseff, the suspended president, as her impeachment trial continues. Rousseff, who is accused of illegally manipulating government accounts to hide the size of the budget deficit, prepares to testify on Monday. Her trial has caused deep divisions in the country. Al Jazeera’s Latin America Editor Lucia Newman reports fro…	0.0516821	2016-08-28T12:44:32.000Z	0.05168205	0.02778986	0.065147184	latin america	latin america	10
604	oJ36MQ-N-AQ	The Stream - When science goes viral	Subscribe to our channel http://bit.ly/AJSubscribe On The Stream: How is social media changing the way we learn about science? At Al Jazeera English, we focus on people and events that affect people's lives. We bring topics to light that often go under-reported, listening to all sides of the story and giving a 'voice to the voiceless.' Reaching more than 270 million households in over 140 countri…	0.0517268	2015-06-13T21:26:19.000Z	0.05172681	0.13423328	0.016766276	media	media	11
605	hvi3SfcRaWw	Inside Story - How will virtual reality change our lives?	It's the wave of the future that promises users an experience that's out of this world. Virtual reality brings users as close to the real experience as they can get without ever leaving home. It's a booming business. Companies are racing to outdo each other, and come up with the best technology to plunge users into an alternative world. Sony is the latest company to unveil its newest gadget. But …	0.0517404	2016-10-14T03:45:02.000Z	0.073380455	0.03957530000000002	0.06300465	science & technology	science & technology	17
606	PVVPsj23cpY	The Secret of the Seven Sisters Promo	Subscribe to our channel http://bit.ly/AJSubscribe The Secrets of the Seven Sisters At Al Jazeera English, we focus on people and events that affect people's lives. We bring topics to light that often go under-reported, listening to all sides of the story and giving a 'voice to the voiceless.' Reaching more than 270 million households in over 140 countries across the globe, our viewers trust Al J…	0.051862	2015-04-12T10:37:30.000Z	0.05186202400000002	0.06111695	0.010577877	media	media	11
607	5mVG4vOVqM0	Yazidi women freed from ISIL	ISIL has captured thousands of Yazidi women and traded them as sex slaves. Some of them have now been freed.	0.0518935	2016-11-29T14:06:49.000Z	0.051893532		0.6026318	iraq	middle east	12
608	uBSjvz0k23w	Dissidents barred from marking Tiananmen anniversary	Security has been tightened in Beijing ahead of the 27th anniversary of the Tiananmen Square massacre. Critics of the government have been prevented from remembering the bloody crackdown on pro-democracy protesters in 1989. But not everyone has been silenced. Al Jazeera's Adrian Brown reports from Beijing. - Subscribe to our channel: http://bit.ly/AJSubscribe - Follow us on Twitter: https://twitt…	0.0519062	2016-06-03T14:13:43.000Z	0.004401148	0.077600524	0.1486614	asia pacific	asia	3
609	87EVBPZgMuI	Major disruptions as freezing temperatures hit East Asia	Freezing temperatures are causing major disruption across East Asia. There's travel chaos in Japan after a cold front dumped snow across the country. In the far north of China - temperatures have dropped to -40C. Rob McBride reports. - Subscribe to our channel: http://bit.ly/AJSubscribe - Follow us on Twitter: https://twitter.com/AJEnglish - Find us on Facebook: https://www.facebook.com/aljazeera…	0.0519178	2016-01-26T03:43:51.000Z	0.057986535	0.20617826	0.11383005	asia	asia	3
610	TLjkqfJYGh0	Death toll rises in South Korea ferry sinking	Divers have now retrieved 171 bodies from the Sewol ferry wreck off South Korea's coast. Rescue teams are still searching for more than 130 people who are believed to be trapped inside the boat that sank last Wednesday on a routine trip from the port of Incheon to the island of Jeju. Most of the victims were students on a field trip. Officials have not yet determined the cause of the sinking. Loc…	0.0521445	2014-04-25T00:58:10.000Z	0.05214446	0.1961269	0.051698725999999987	asia pacific	asia	3
611	TBllyKmA6Jk	Residents cope as island shrinks in Bangladesh	Climate change has brought rising sea levels to Bangladesh and parts of fisherman Nuru Miah's home have already sunk below the water. Al Jazeera's Maher Sattar reports from the island of Bhola. - Subscribe to our channel: http://bit.ly/AJSubscribe - Follow us on Twitter: https://twitter.com/AJEnglish - Find us on Facebook: https://www.facebook.com/aljazeera - Check out our website: http://www.alj…	0.0521953	2015-12-06T15:30:46.000Z	0.042321455	0.09227249	0.037555594	environment	environment & weather	5
612	joyO7VOA5Ho	Niger holds presidential run-off vote amid opposition boycott	Niger is at the polls for a runoff vote. But the opposition isn't taking part - and says voters should boycott too - because of alleged fraud. Mohamed Vall reports. - Subscribe to our channel: http://bit.ly/AJSubscribe - Follow us on Twitter: https://twitter.com/AJEnglish - Find us on Facebook: https://www.facebook.com/aljazeera - Check our website: http://www.aljazeera.com/	0.0522037	2016-03-20T11:43:39.000Z	0.05220367	0.57823396	0.42221665	africa	africa	1
613	bVeVFR1cLXE	Counting the Cost - Extra - Pretoria's power problems	What is the impact of South Africa's electricity crisis on health and environment? - Subscribe to our channel http://bit.ly/AJSubscribe - Follow us on Twitter https://twitter.com/AJEnglish - Find us on Facebook https://www.facebook.com/aljazeera - Check out our website:http://www.aljazeera.com/	0.0522704	2015-04-07T11:05:05.000Z	0.052270375	0.08592058	0.027810285	africa	africa	1
614	y2WqBJmqAtE	Featured Documentary - 7 up South Africa promo	Subscribe to our channel http://bit.ly/AJSubscribe In 1992 apartheid South Africa we meet 20 lively, candid 7 year olds of all races who we'll follow every 7 years as they grow up in times of great change.	0.0523145	2017-09-23T23:33:54.000Z	0.07322605	0.03620255	0.04392539	africa	africa	1
615	6Fp3Bxs-bxw	Investigating Katrina: Lessons learned from the storm - TechKnow	In 2005 hurricane Katrina claimed 1800 lives, leaving 80% of New Orleans devastated and under water. Only one line of defense, the levee, failed the city. Since the disastrous storm hit, there have been concerted efforts to reduce risks from another possible Katrina. The Army Corps of Engineers has been responsible for the ciy's structural defense since the 1920s. Mike Park, chief of operations, …	0.0523706	2016-08-29T12:56:41.000Z	0.052370597000000005	0.042649772	0.014599392	united states	us & canada	19
616	tRSJ_McrWDc	Swimrun, the endurance race growing in popularity	When we think of endurance sports, we might think of Ultramarathons or Ironman triathlons. But there's a new discipline in Sweden that's gaining a reputation as one of the toughest in the world. It's called swimrun. Team of two swim and run a total of 75km among and over 26 islands in Stockholm's archipelago. It's now in its 10th year and gaining popularity. Paul Rhys explains.	0.052415	2015-09-16T11:37:25.000Z	0.052415043	0.23899119	0.012548893	sport	sport	18
617	3mBttFXSfOA	Boko Haram battle dominates Nigeria election campaigns	Nigeria's presidential election is less than a week away. Security and the battle against Boko Haram have dominated the campaign. But there are still many other issues Nigerians want addressed, including chronic water shortages. Mohammed Adow reports from Nigeria's biggest city, Lagos.	0.0524266	2015-03-25T08:48:55.000Z	0.079894125	0.12878186	0.12429160000000004	africa	africa	1
618	oIxvdBPNwJ4	Al Jazeera Correspondent - Putting Man on the Moon	Sixty years after the Wright Brothers put man in the air, scientists and engineers were grappling with the next major challenge: putting a man in space - and keeping him alive there. As an engineering challenge, it was the most extreme imaginable. Their solution was a rocket and the most complicated piece of personal protection equipment man has ever known: the space suit. The design challenge wa…	0.0524613	2016-12-03T22:22:25.000Z	0.041867387	0.08146535	0.10557565	science & technology	science & technology	17
619	YFU-pNoEqVA	World Radio Day: Old technology proves resilient	Digital technology may have invaded the lives of millions of people around the world, but one old technology is still a major source of news, information and entertainment. That’s radio - and Saturday is world radio day, an opportunity to take a look at how it impacts the lives of millions of people. Al Jazeera's technology editor Tarek Bazley. - Subscribe to our channel: http://bit.ly/AJSubscrib…	0.0525323	2016-02-14T23:15:06.000Z	0.03940141	0.05215394	0.034905322	science & technology	science & technology	17
620	nwBQAJt6cHg	ATMs deliver clean water to India's poorest	An innovative new water dispensing system being used in New Delhi, the Indian capital, could provide millions of India's poorest with clean, drinkable water. For just five cents, the water purification machine will dispense 20 litres of water, giving the poorest in society an alternative to pumping contaminated water from below ground. With the country's billion-strong population growing even fur…	0.0525659	2014-05-14T20:24:27.000Z	0.019665737	0.28621143	0.06988525	asia	asia	3
621	2HPIdw02BXA	It’s been 15 years since the iPod launched	On this day 15 years ago, a California-based technology company launched a small handheld device it hoped would be successful. Little did Apple know that the iPod would change the way hundreds of millions of people listen to music. Al Jazeera’s science and technology editor Tarek Bazley reports. - Subscribe to our channel: http://aje.io/AJSubscribe - Follow us on Twitter: https://twitter.com/AJEn…	0.0526217	2016-10-24T18:14:18.000Z	0.06520114	0.06979435	0.009262407	science & technology	science & technology	17
622	rfWu8unTvXc	What will the Paris attacks mean for the refugees? - Highlights	The Stream discussed how the Paris attacks are impacting attitudes towards refugees. For more, watch the full episode: https://www.youtube.com/watch?v=8EYbtfxOAWU Subscribe to our channel: http://bit.ly/AJSubscribe Follow us on Twitter: https://twitter.com/AJEnglish Find us on Facebook: https://www.facebook.com/aljazeera Check our website: http://www.aljazeera.com/	0.0526316	2015-11-22T23:11:59.000Z	0.05263159	0.12272105	0.039745376	europe	europe	6
623	TDW6fcHzUxY	Guinea schools reopen after deadly teachers' strike	Schools have reopened in Guinea after a partial lifting of the three-week teachers' strike over pay. But, more than half the students in the largest schools in the capital Conakry were absent. At least seven people have been killed in demonstrations since the strike began. Al Jazeera’s Paul Chaderjian reports. - Subscribe to our channel: http://aje.io/AJSubscribe - Follow us on Twitter: https://t…	0.0526452	2017-02-23T19:03:15.000Z	0.05264523	0.17084579	0.03806272	africa	africa	1
624	cO6xlGuRyyM	Witness - The Last Russian Limousine promo	Subscribe to our channel http://bit.ly/AJSubscribe Last orders for legendary Russian ZIL limousines as the final three are prepared for the Victory Day Parade on Red SquareAt Al Jazeera English, we focus on people and events that affect people's lives. We bring topics to light that often go under-reported, listening to all sides of the story and giving a 'voice to the voiceless.' Reaching more th…	0.0526539	2014-05-22T09:48:35.000Z	0.052653886	0.09399429	0.011632458	europe	europe	6
625	cUhEJ3W3CCg	Innovative ways to get to airwaves in Zimbabwe	It's World Radio day, and we’re marking it with a series of reports on the state of radio broadcasting around the globe. In Zimbabwe, many communities are still waiting for government permission to set up radio stations. To work around the delays, they've come up with innovative ways to tell their stories. Al Jazeera's Haru Mutasa reports from Kwekwe. - Subscribe to our channel: http://aje.io/AJS…	0.0526821	2017-02-14T09:23:56.000Z	0.07379482	0.07922771599999999	0.017556686000000002	africa	africa	1
626	7xHQalQkbrk	Al Jazeera’s pursuit of the FIFA ethics inspector	Michael Garcia avoids answering journalists' questions following lunch with American lawyers and sports journalists in London.	0.0527285	2014-10-14T18:04:00.000Z	0.052728474000000004	0.18800175	0.014231086	media	media	11
627	Ueyrjrf1h9I	The Stream - Samaritans gone wrong?	Subscribe to our channel http://bit.ly/AJSubscribe On The Stream: The Stream discusses the real-life inspiration for a new Kenyan TV comedy mocking aid workers. At Al Jazeera English, we focus on people and events that affect people's lives. We bring topics to light that often go under-reported, listening to all sides of the story and giving a 'voice to the voiceless.' Reaching more than 270 mill…	0.0528663	2016-02-17T12:29:19.000Z	0.05286632	0.10268709	0.023579871	europe	europe	6
628	9DcT5p-fFvw	Head to Head - Shlomo Ben Ami (Web Extra)	Subscribe to our channel http://bit.ly/AJSubscribe Mehdi Hasan challenges the former Israeli foreign minister, Shlomo Ben Ami, about the origin, concept and impact of Zionism. Is it a national liberation movement or a colonial project? Tune in to Al Jazeera for the full interview on March 14 at 20:00 GMT l http://aje.me/OAYbIu	0.0529294	2014-02-13T15:23:55.000Z	0.052929446	0.19970123	0.015102051000000003	israel	israel-palestine	9
629	l32a2NXSLIk	'Business in a box' eases Canada rental woes	Business rents are high in the eastern Canadian city of Toronto, but one community organiser has found a way to solve the problem by reusing old shipping containers. On a business trip to Ghana, Kevin Lee saw battered, rusty containers used as barber shops and other businesses and decided to bring the idea back to Canada in the form of a programme called 'business in a box'. Lee's programme conne…	0.0530061	2014-01-09T22:24:13.000Z	0.053006085999999994	0.13083476	0.005054534	business & economy	business & economy	4
630	0rHwmgg5pMk	OPEC members meet to discuss oil prices	Organisation of the Petroleum Exporting Countries (OPEC) members have gathered in Vienna in one of the most crucial meetings regarding oil in years as the price of crude slid more than 30 percent since June. OPEC members are attempting to find a solution regarding the slump as big oil producers like Saudi Arabia, Iran and Venezuela are continuing to see a loss in money. The decline in prices woul…	0.053016	2014-11-27T19:20:52.000Z	0.053016007000000004	0.012693141000000002	0.06392452	business & economy	business & economy	4
631	YT-rHzeGKeY	The Show Must Go On - Witness	Subscribe to our channel http://bit.ly/AJSubscribe Subscribe to our channel http://bit.ly/AJSubscribe Humour is a serious business in Yemen. In a country where illiteracy is high and official news is deemed untrustworthy, political satire poking fun at Yemeni officials has mushroomed since the country's 'Arab Spring'. And making fun of Yemeni politics has become something of a national hobby. At …	0.0530723	2013-08-28T19:10:42.000Z	0.04325195	0.07491462	0.055575542	media	media	11
632	RvY_cGLbGCQ	Seizing Solar Power - Witness	Subscribe to our channel http://bit.ly/AJSubscribe One Latin American woman's quest to harness the power of the southern sun. Subscribe to our channel http://bit.ly/AJSubscribe Follow us on Twitter https://twitter.com/AJEnglish Find us on Facebook https://www.facebook.com/aljazeera Check our website http://www.aljazeera.com/ At Al Jazeera English, we focus on people and events that affect people'…	0.0532097	2015-02-01T01:28:32.000Z	0.028683407	0.060388452999999995	0.01975238	media	media	11
633	8bLSnmCrans	Jailed Al Jazeera staff granted bail pending Cairo retrial	An Egyptian court has granted bail to two Al Jazeera journalists, jailed for 411 days. Mohamed Fahmy and Baher Mohamed are falsely accused of colluding with the outlawed Muslim Brotherhood. Their trial will resume on February 23. Al Jazeera's Neave Barker reports.	0.0532139	2015-02-13T10:55:58.000Z	0.027961034	0.15063479999999999	0.14263201	egypt	middle east	12
634	tw3BxQxRRr8	Jordan's women's football team making huge progress	Jordan’s women’s football team may only be a decade old but it has become the strongest female team in the Middle East. However, Jordan is a socially and religiously conservative country and many believe football is not an appropriate sport for females. Nisreen El-Shamayleh reports from Amman	0.053224	2015-06-23T17:23:34.000Z	0.053223955999999996	0.09833724	0.064348936	middle east	middle east	12
635	v6T4F6yRIxA	US mulls raising hefty tariffs on Chinese steel	The US wants to raise tariffs on Chinese steel imports by more than 500 percent. Washington has accused China of dumping steel and pushing prices down world wide but Beijing denies this. Al Jazeera’s Patty Culhane reports from Washington. - Subscribe to our channel: http://bit.ly/AJSubscribe - Follow us on Twitter: https://twitter.com/AJEnglish - Find us on Facebook: https://www.facebook.com/alja…	0.0534839	2016-05-20T05:49:05.000Z	0.0020162007	0.07977843	0.08941724	china	asia	3
636	yXnTDnp-VRI	earthrise - Season 9 Coming Soon promo	earthrise explores solutions to the environmental challenges we all face, taking an upbeat look at ecological, scientific, technological and design projects the world over. - Subscribe to our channel: http://aje.io/AJSubscribe - Follow us on Twitter: https://twitter.com/AJEnglish - Find us on Facebook: https://www.facebook.com/aljazeera - Check our website: http://www.aljazeera.com/	0.0535557	2017-05-02T16:27:03.000Z	0.09862483	0.07559855	0.0049945274	africa	africa	1
637	woGoD2-CHfs	Story behind Afghanistan’s first female rangers | rendezVIEW	Subscribe to our channel http://bit.ly/AJSubscribe “I certainly went out there with these preconceived notions about Afghanistan. Everything I had read about or heard was that there was a real gender divide and that women really didn’t do things like be female rangers, have jobs, make big decisions when it comes to their community. All those notions were completely broken for me.” Afghanistan’s h…	0.0535911	2015-05-14T20:42:54.000Z	0.11438293	0.052615725	0.044609793	afghanistan	middle east	12
638	ZyAimv511eA	Chile mulls tighter rules to combat price fixing	Chile is considering tighter rules to combat price fixing after supermarkets were accused of colluding to keep the cost of groceries up. Al Jazeera's Lucia Newman reports. Subscribe to our channel http://bit.ly/AJSubscribe Follow us on Twitter https://twitter.com/AJEnglish Find us on Facebook https://www.facebook.com/aljazeera Check our website: http://www.aljazeera.com/	0.0537402	2016-02-21T13:34:51.000Z	0.053740203	0.043755952	0.11400241400000001	business & economy	business & economy	4
639	-StpwupgCnM	Coming Up In April on Al Jazeera English	Subscribe to our channel http://bit.ly/AJSubscribe Highlights of news coverage and documentaries on Al Jazeera in April 2015.	0.0538307	2015-03-30T06:00:57.000Z	0.053830672	0.09952752	0.004031957	media	media	11
640	h8osr9EHdwU	Anti-government protesters brace for more violence in Ukraine	The government and the protestors equally determined not to give way in Ukraine, and the result has been catastrophic. At least 26 people are now confirmed dead, and more than 200 others were injured after clashes between demonstrators and security forces on Tuesday night. Al Jazeera's Barnaby Phillips reports from Kiev.	0.0538523	2014-02-19T20:36:45.000Z	0.053852300000000006	0.25057003	0.033251543	protests	politics	13
641	HrF2TqIF6SA	Mike Hanna reports from Cairo about killings	Anti-coup alliance has been giving a press conference, calling for a formal investigation into killings of 36 protesters in police custody.	0.0539788	2013-08-20T04:26:58.000Z	0.032431453	0.23754409	0.11303102	politics	politics	13
642	7PDvjW_Yi1E	Partial results suggest Brazil run-off	Brazil's leftist incumbent Dilma Rousseff is leading presidential elections but has not got enough votes to avoid a run-off and will probably face Aecio Neves, pro-business rival, partial results and exit polls suggest. More than 142 million people took part in the polls. Al Jazeera's Gabriel Elizondo reports from Sao Paulo.	0.0540305	2014-10-06T04:22:58.000Z	0.05403049	0.11538395	0.09383748	elections	politics	13
643	bAHmvZgdRNU	Ethiopia criticised over lack of press freedom	Ethiopia's economy is one of the fastest growing in the world. The government says its determined to transform the country into a middle-income nation in the next decade. But it also has one of the worst reputations in the world when it comes to media freedom. Charles Stratford reports from Addis Ababa. Subscribe to our channel: http://bit.ly/AJSubscribe Follow us on Twitter: https://twitter.com/…	0.0540321	2015-11-24T08:20:51.000Z	0.05403213	0.24126314	0.05570093	africa	africa	1
644	xWaQlNVbEe8	California drought chokes farming industry	The US state of California is experiencing its worst drought in one hundred years, according to the state's governor. After weeks of public and political pressure, California Governor Jerry Brown officially declared a state drought emergency. The move clears the way for California to seek federal aid and increase conservation efforts aimed at easing the water crisis. California's agricultural ind…	0.054182	2014-01-18T18:52:14.000Z	0.054181955999999996	0.12348067	0.05147335	united states	us & canada	19
645	rQ_tbxGpuOk	Cannes festival: Wonderstruck and Loveless stand out as potential Palm d'Or winners	The Palme d'Or is one of the most prestigious prizes in world cinema. It celebrates innovation and skill in art-house film making. At the 70th Cannes film festival this year, Wonderstruck and Loveless are two standout films which have critics buzzing. Al Jazeera's Charlie Angela reports from Cannes. - Subscribe to our channel: http://aje.io/AJSubscribe - Follow us on Twitter: https://twitter.com/…	0.0543083	2017-05-21T07:03:39.000Z	0.054308347	0.04844189	0.0021621769	arts & culture	arts & culture	2
646	lp5gEVeYHTI	Inside Story - Is peace possible in South Sudan?	Inside Story: South Sudan's President Salva Kiir has signed a peace deal that it is hoped, will end 20 months of war. The conflict has killed tens of thousands of people. And brought the country to the brink of famine and economic collapse. Rebel leader Riek Machar signed the deal last week, but President Kiir had, until on Wednesday, expressed reservations. The agreement calls for an immediate e…	0.0543106	2015-09-11T20:38:13.000Z	0.057011038	0.048025418	0.07383261599999999	africa	africa	1
647	qmNDotmlYNM	earthrise - Dark Isle of Sark	Wildlife and astronomy lovers benefit from an initiative to reduce light pollution.	0.0544253	2013-11-06T20:56:58.000Z	0.017215919	0.10869149	0.013331042	environment	environment & weather	5
648	iaLV_1_f4IM	Inside Story - Libya unrest : regional fallout?	Borders and embassies are closed as neighbours assess the impact of the latest violence.	0.0544642	2014-05-20T22:05:53.000Z	0.054464158	0.03753789	0.23754409	libya	africa	1
649	9gTucsGEOJ0	Conservation motivates Kenya Maasai Olympics	It is called the Maasai Olympics, a biennial event in Kenya that uses traditional sport to help save one of the country's most important animals. For generations, the only way for Maasai boys to prove their manhood and become a warrior was to kill a lion. But with the animal's population dropping by a third in the past two decades, the tribe has adopted a modern interpretation of their ancient tr…	0.0545698	2014-12-14T22:47:27.000Z	0.01121652	0.23754409	0.107631005	africa	africa	1
650	8zgolrNwzQ4	Public sector wages drain Kenya's economy	Kenya is facing a public wage bill crisis - with a bloated workforce and rampant corruption. Experts are warning of an economic meltdown if the problem is not addressed. Al Jazeera's Catherine Soi reports from Nairobi.	0.0545836	2017-10-14T11:50:58.000Z	0.021970296	0.06750868	0.32535088	africa	africa	1
651	9fCdw7MsAfY	The Rescued Film Project	Levi Bettweiser has spent years restoring old rolls of film. Many of the photographs he develops reveal unseen moments from history. Watch more AJ Shorts http://www.aljazeera.com/shorts Subscribe to our channel http://bit.ly/AJSubscribe Follow us on Twitter https://twitter.com/AJEnglish Find us on Facebook https://www.facebook.com/aljazeera Check our website: http://www.aljazeera.com/	0.05465	2017-09-24T14:55:31.000Z	0.015830232	0.011199551	0.035065345	arts & culture	arts & culture	2
652	Xj8b4FkZha4	Al Jazeera World - Women of Krusha	The story of how the women of a Kosovan village rebuilt their lives after many of their men were killed in 1999.	0.0547218	2018-01-23T15:16:09.000Z	0.037555486	0.43886977	0.23683397	middle east	middle east	12
653	lKH9ydKMHVE	Next generation technologies designed to change lives	An exhibition of next generation devices designed to make our lives easier is being held in London. Among the inventions created by students at Imperial College is a vibrating pen, to help those with Parkinson's disease write more easily and a glove that allows you to carve tough products as if they were made of clay. Al Jazeera's Simon McGregor-Wood reports from London. Subscribe to our channel …	0.0547383	2015-07-07T22:01:06.000Z	0.04344811	0.03194452	0.051737107	united kingdom	europe	6
654	r5HeXuTZeTQ	Stolen Van Gogh paintings recovered after 14 years	Italian police have recovered two paintings by the Dutch artist Vincent Van Gogh in Naples that were stolen nearly 14 years ago in the Netherlands. Despite their long absence, the damage to the paintings is said to be minimal. Each painting is said to be worth more than $50 million. Al Jazeera’s Emma Hayward explains. - Subscribe to our channel: http://aje.io/AJSubscribe - Follow us on Twitter: h…	0.0547909	2017-09-04T23:15:19.000Z	0.010254985	0.109981954	0.03588054	africa	africa	1
655	X0x6pjUDUeg	Agora: From Democracy to The Market promo	An inside look at the devastating impact of the Greek financial crisis on ordinary citizens and the failure of Greek and European leaders to avert disaster.	0.0549175	2015-07-05T10:59:35.000Z	0.054917462	0.116760366	0.11348151	europe	europe	6
656	vctVWDic5Xc	101 East - Generic July promo	Subscribe to our channel http://bit.ly/AJSubscribe A weekly current affairs programme covering Asia, a dynamic region with diverse cultures and conflicting politics.	0.0550177	2013-07-27T05:33:23.000Z	0.055017712999999996	0.12230892	0.016687096999999998	asia pacific	asia	3
657	LwvxevcBqNM	Hungary PM Orban wins third term in office	Hungarians have re-elected their Prime Minister, Viktor Orban, for another four years and the far-right Jobbik party has increased its share of the vote. An official projection gave Orban's Fidesz party 133 of the 199 seats in parliament after 96 percent of the ballots were counted from Sunday's election, guaranteeing that it will form the next government. Orban has pledged more of the same and t…	0.0550421	2014-04-07T03:01:28.000Z	0.05504212	0.04253474	0.029774256	politics	politics	13
658	bbMKcvbTT5U	Techknow - The Science of the Senses promo	- Subscribe to our channel: http://aje.io/AJSubscribe - Follow us on Twitter: https://twitter.com/AJEnglish - Find us on Facebook: https://www.facebook.com/aljazeera - Check our website: http://www.aljazeera.com/	0.0551164	2017-03-28T10:09:49.000Z	0.05511641	0.10251861	0.00718717	science & technology	science & technology	17
659	3rhfqPuvbj4	More anti-government protests Haiti	Police have used tear gas to break up an anti-government protest in Haiti's capital in one of a growing number of demonstrations in the Caribbean island nation in the last few months. Protesters are frustrated at the rising cost of living and the opposition says elections are more than two years overdue. Al Jazeera's Erica Wood reports.	0.0551221	2014-04-16T10:14:52.000Z	0.055122133	0.23754409	0.07846111	human rights	human rights	8
660	bKN0fOM3rLg	Featured Documentary - Meltdown - Global Tsunami promo	Subscribe to our channel http://bit.ly/AJSubscribe Featured Documentary - Meltdown - Global TsunamiAt Al Jazeera English, we focus on people and events that affect people's lives. We bring topics to light that often go under-reported, listening to all sides of the story and giving a 'voice to the voiceless.' Reaching more than 270 million households in over 140 countries across the globe, our vie…	0.0552193	2014-01-21T10:25:43.000Z	0.055219263	0.11292437	0.014554241	europe	europe	6
661	eI5uWnYhBtE	Volkswagen braces for claims after emissions scandal	The head of Volkswagen says he has apologised in person to US President Barack Obama over the company's emissions scandal. VW admitted rigging 11 million of its diesel cars to cheat worldwide pollution tests, and has set aside $18bn to deal with the crisis. Al Jazeera's Dominic Kane reports from VW's headquarters in Wolfsburg. - Subscribe to our channel: http://bit.ly/AJSubscribe - Follow us on T…	0.0552271	2016-04-28T18:58:27.000Z	0.055227146	0.04788213	0.11650512	united states	us & canada	19
662	MDNybwryZC4	Drought leaves Sri Lanka farmers deep in debt	A lack of rain in Sri Lanka has hit farmers hard. In the worst-affected areas they have lost all their crops and are facing mounting debt. Many have taken loans or pawned their tractors and jewellery to get money for their fields Al Jazeera's Minelle Fernandez reports from Kebithigollawa in northeast Sri Lanka on how things are about to get worse.	0.0552306	2014-03-17T19:23:56.000Z	0.05821491	0.18562795	0.10813234	weather	environment & weather	5
663	x83MeKaYoPM	S Korea's elderly hopeful of Park presidency	Subscribe to our channel http://bit.ly/AJSubscribe Subscribe to our channel http://bit.ly/AJSubscribe Park Geun-Hye, the daughter of South Korea's late military ruler, has been sworn in as the country's first female president, promising a new era of economic revival. But bome people are concerned Park has made campaign promises she cannot afford to keep. One of those pledges: Support of the elder…	0.0552841	2013-02-25T16:35:36.000Z	0.05528414	0.30069846	0.023155423	asia pacific	asia	3
664	aIVnZzQ-XBY	Toxic waters of the Anacostia river	More than 32 trillion litres of raw sewage and toxic materials flow into US waterways each year. In the capital Washington, the Anacostia River has long been a toxic channel of human waste and chemicals. In the fourth part of our Rivers of Life series, Al Jazeera's Shihab Rattansi reports on how local government is trying to stem the flow. - Subscribe to our channel: http://bit.ly/AJSubscribe - F…	0.0553437	2015-12-22T13:00:00.000Z	0.055343684000000004	0.20140386	0.16517386	media	media	11
665	hNTgF3A_ge8	Olympics presents Boris the golden edge	He may not have competed in the Games, but one figurehead of London 2012 stands to win a great deal from the event. The Olympics has helped to raise Mayor Boris Johnson's political profile and there's speculation he could even become the next leader of the Conservative party and a potential future Prime Minister. Al Jazeera's Harry Smith reports from London.	0.055358	2012-08-05T16:31:05.000Z	0.055358037	0.064742535	0.0402016	europe	europe	6
666	PwxHpWYYsz0	Empire - Extended Interview: Reza Marashi	Subscribe to our channel http://bit.ly/AJSubscribe Reza Marashi is the Director of Research at the National Iranian American Council. Previously, he worked at the Office of Iranian Affairs at the US Department of State, and as an analyst at the Institute for National Strategic Studies (INSS). In this extended interview, Marashi discusses what he thinks is the root of the US-Iranian political conf…	0.0554252	2013-12-30T16:36:16.000Z	0.05542516	0.009121118000000001	0.032696743	iran	middle east	12
667	cR9ZtYRACDc	Russian company digitising Tolstoy's works	He was the Russian master novelist, whose works inspired people like Mahatma Gandhi and Martin Luther King. Now Leo Tolstoy's entire body of work is being digitised, making it more accessible to the modern world. Al Jazeera's David Chater reports from Yasnaya Polyana, Russia.	0.0554906	2015-07-12T03:56:16.000Z	0.06838366	0.18330711	0.01776335	arts & culture	arts & culture	2
668	vOHPK0M6sww	Innovate Africa - Community active	From recycling with cycles to using waste to build cheap computers, meet the young social entrepreneurs changing Africa.	0.0555685	2015-01-02T09:37:38.000Z	0.049037095	0.011756126	0.21386698	africa	africa	1
669	VAuMAM3e7f8	UK: Scientists look to tap into tidal power	As the world looks towards a future fuelled by renewable energy, the race is on to develop cutting-edge sustainable technology. And one area that is still in an experimental stage is how best to turn the energy of our oceans into electricity. Al Jazeera’s Nick Clark reports from the Shetland Islands, off the coast of Scotland, where the powerful seas provide the perfect conditions for testing wav…	0.0555954	2016-11-10T22:26:18.000Z	0.042308155	0.05484884	0.01090528	science & technology	science & technology	17
670	2KEmNZzU_m8	Mexico carries on Christmas 'piñata' tradition	It's a common sight at the end of many a party in Latin America: the piñata. But nowhere are they as popular as in Mexico. Families buy them and then break them, especially during festive season. Al Jazeera's Natasha Ghoneim reports from Mexico City on how artisans there have been making these colorful crafts for generations. Subscribe to our channel http://bit.ly/AJSubscribe Follow us on Twitter…	0.0556567	2015-12-25T13:08:12.000Z	0.07137416	0.23754409	0.017268809	latin america	latin america	10
671	Jqa2ohJ_2nQ	Japan urges evacuation as typhoon moves in	One killed, more than 500,000 people urged to evacuate and hundreds of flights cancelled as Neoguri slams Japan. Al Jazeera's Caroline Malone reports. Subscribe to our channel http://bit.ly/AJSubscribe Follow us on Twitter https://twitter.com/AJEnglish Find us on Facebook https://www.facebook.com/aljazeera Check our website: http://www.aljazeera.com/	0.0557732	2014-07-08T22:30:31.000Z	0.046679184000000006	0.050140258	0.19656685	japan	asia	3
672	X5bmJyA8LZQ	Al Jazeera Frames - Timeless	Subscribe to our channel http://bit.ly/AJSubscribe Timelapse cinematography captures various scenes and sights of life around London.	0.0557732	2012-11-07T07:25:47.000Z	0.10752093	0.050081555	0.0020593544	europe	europe	6
673	sbc0tQfY1BA	Bank offers hope for Bangladeshi children	Bangladesh's most disadvantaged children survive by scraping a living on a daily basis. They can't save what little money is left over from food as it often gets stolen. Many end up spending it on alcohol or drugs. In the dusty back-streets of the capital Dhaka, an informal bank has been set up allowing children to safely deposit their money and withdraw it whenever they want. Al Jazeera's Shamim…	0.0557921	2017-01-18T20:40:14.000Z	0.054250065	0.14760093	0.2717834	asia	asia	3
674	G5kFQCRrH-E	ICC to probe alleged abuse by UK forces	Human rights lawyers have outlined allegations by hundreds of Iraqis that they were mistreated by British forces. More than 400 claims by Iraqis are now being presented in a dossier to the International Criminal Court. Alleged abuses include sleep and food deprivation, physical assault, electrocution, mock executions and threats of rape. Britain's Ministry of Defence has issued a statement saying…	0.0558744	2014-01-15T18:02:32.000Z	0.054229777	0.2579187	0.23754409	europe	europe	6
675	a_Wr3tBJHG0	America's oldest newspaper delivery man	Frank Wheeler is believed to be the oldest newspaper delivery man in the United States. Having owned a construction company in his early life at age 88, he decided to take on another career, delivering The Des Moines Register in his native Iowa. Al Jazeera's John Hendren reports from Montezuma, Iowa.	0.0558831	2014-02-12T20:00:42.000Z	0.10136502	0.048880607	0.010900018	latin america	latin america	10
676	znukilfVfcA	Compass - promo	After 5 days on a crowded boat crossing the Mediterranean, the Khalili’s, a Syrian refugee family reach Italy. Their destination is Austria for a new future.	0.055929	2015-07-23T13:20:43.000Z	0.05592897	0.03546464	0.04506389	middle east	middle east	12
677	kgFFnn9X-3E	Myanmar opposition projected to win general elections	Myanmar's main oppostion party, the National League for Democracy, is projected to win a landslide in the country's parliamentary elections. Early results give Aung San Suu Kyi's party more than 70 percent of seats in the first properly held vote in decades. Myanmar's ruling party - backed by the military - has said it will respect the result. Al Jazeera's Florence Looi reports from Yangon.	0.0560168	2015-11-09T21:26:59.000Z	0.056016758	0.016453976000000002	0.05750563	myanmar	asia	3
678	AdzwI01kT7o	Talk to Al Jazeera - Izzeldin Abuelaish: 'Armed with love'	Events in the Middle East often seem caught up in a never ending spiral of conflict, recriminations and finger pointing. But is there a way out? One man says yes. And he should know. More than three years ago, Izzeldin Abuelaish experienced a tragedy. During the war on Gaza, Israeli tank shells hit his home. His three daughters - Aya, Bessan and Mayar - were killed. They were looking for a better…	0.056054	2013-09-08T15:24:05.000Z	0.0034318375	0.08627112	0.121499635	israeli–palestinian conflict	israel-palestine	9
679	GkMdUc0NNnw	The Stream - Living with sickle cell anemia	The Stream - Living with sickle cell anemia Doctors hope a recent medical breakthrough could lead to a cure for sickle cell anemia, an inherited condition that can cause crippling pain and shortened lifespans for the estimated quarter million babies born with it each year. Earlier this month, doctors announced the results of an experimental gene therapy that is offering hope to those who suffer f…	0.0561209	2017-09-16T16:43:34.000Z	0.05958883	0.3200304	0.04860798	health	health	7
680	AbgtFniTdEI	Fault Lines - Albuquerque Police: A History of Violence promo	Fault Lines investigates a pattern of excessive force used by Albuquerque Police and whether it ignored records of misconduct in hiring police officers. - Subscribe to our channel: http://bit.ly/AJSubscribe - Follow us on Twitter: https://twitter.com/AJEnglish - Find us on Facebook: https://www.facebook.com/aljazeera - Check out our website: http://www.aljazeera.com/	0.0562873	2016-01-07T09:30:30.000Z	0.055407717999999995	0.32161009999999995	0.13545258	donald trump	us & canada	19
681	a2FzpKJVRH4	Exercise helps South Africa's senior citizens ward off depression	Elderly people suffering from depression in South Africa rarely have access to help, especially in poorer communities. Now an exercise programme for elderly patients is helping them fight depression, as Haru Mutasa reports from Johannesburg. Subscribe to our channel http://bit.ly/AJSubscribe Follow us on Twitter https://twitter.com/AJEnglish Find us on Facebook https://www.facebook.com/aljazeera …	0.0562898	2016-01-25T17:44:02.000Z	0.04595131	0.1003787	0.05106621	africa	africa	1
682	i_e7OIQruIc	Bangladesh goes back to basics to stop erosion	Bangladesh is using sandbags to contain erosion incidents that sweep away homes and land of more than 60,000 families every year. Engineers have plumped for sandbags instead of the more expensive, imported concrete slabs that were being used before. Al Jazeera correspondent Maher Sattar reports from Sirajganj district of Rajshahi division of northern Bangladesh. Engineers have plumped for sandbag…	0.0563425	2014-06-09T00:18:04.000Z	0.023739336	0.122602984	0.023045652000000003	asia	asia	3
683	daawVcxKTTQ	Journalist Ferial Haffajee: Spy Cables 'huge news' in South Africa	Subscribe to our channel http://bit.ly/AJSubscribe Subscribe to our channel http://bit.ly/AJSubscribe Ferial Hafajee, the editor of City Press, a weekly South African newspaper says that The Spy Cables are making huge news in the country. To read more on the leaks: www.aljazeera.com/spycables More on our website: http://aljazeera.com Follow us on Twitter: http://twitter.com/AJEngligh Subscribe to…	0.0563632	2015-02-26T13:49:05.000Z	0.05636318	0.11708187	0.008765848	africa	africa	1
684	DvgyxrSn45c	Zika puts further strain on Venezuela's collapsing health system	The WHO has declared a global health emergency in response to a growing number of birth defects in Brazil, and their possible link to the mosquito-borne disease. Venezuela is one of the 24 countries affected by Zika. And as Virgina Lopez reports, the nation is facing the challenges of a health system on the brink of collapse. - Subscribe to our channel: http://bit.ly/AJSubscribe - Follow us on Tw…	0.0564437	2016-02-02T19:47:06.000Z	0.05644371400000001	0.103493445	0.052377548	health	health	7
685	czQPcIURKJQ	earthrise - A Liter of Light	Despite living in the sunny tropics, many people in the Philippines spend their days in darkness cramped together in make-shift homes with limited privacy and electricity. However, a locally raised social entrepreneur and Liter of Light founder Illac Diaz has developed a green, cheap and simple method to illuminate homes – plastic bottles filled with water and bleach and installed into rooftops. …	0.0564549	2014-04-03T12:56:45.000Z	0.1077299	0.07466773	0.050910406	environment	environment & weather	5
686	ogjWNa04Pmw	Eight-year-old Nancufil termed the new Messi	Eight-year-old Claudio Gabriel Ñancufil is a magician with the ball and already has the big clubs in Argentina and Europe excited by his promise. Daniel Schweimler reports from Buenos Aires	0.056485	2014-01-05T15:29:07.000Z	0.043281652000000004	0.093785256	0.029774481	africa	africa	1
687	IT9CimE4gBM	Houthi leader vows to defend 'glorious revolution'	The leader of Yemen's Houthi fighters has defended the group's overthrowing of the government, calling it a 'glorious revolution' that has 'broken the shackles of injustice and corruption'. Al Jazeera's Jamal Elshayyal reports from Aden.	0.0565776	2015-02-07T19:15:58.000Z	0.056577608	0.21180645	0.24709606	middle east	middle east	12
688	qFeOYRtNzG8	Ali Bongo to be sworn in as Gabon’s president	In Gabon, Ali Bongo is to be sworn into office on Tuesday after the constitutional court confirmed his victory in August’s presidential elections. Opposition leader Jean Ping has criticised the ruling. Al Jazeera's Nicolas Haque met with President Bongo, and has this exclusive report from Libreville. - Subscribe to our channel: http://aje.io/AJSubscribe - Follow us on Twitter: https://twitter.com…	0.056589	2016-09-27T09:27:28.000Z	0.06441656	0.35141409999999995	0.05192476	africa	africa	1
689	IUUZMyMDBsU	The parents of Austin Tice, missing in Syria	The parents of Austin Tice, who went missing in Syria, speak about their ordeal and the challenge of not knowing where their son is, having nobody to negotiate with and no ransom demands to deal with. See the full documentary, Al Jazeera Investigates - The Hostage Business, here from October 12, 2015: https://youtu.be/gEKW-8W5QAI You can also see the film on TV at these times on Al Jazeera Englis…	0.0566034	2015-10-08T21:24:18.000Z	0.056603352999999995	0.060139883	0.014271743	europe	europe	6
690	Fw3H3ILSctM	Iraqi forces try to recapture Ramadi from ISIL	Iraqi soldiers are battling to recapture the key city of Ramadi from ISIL. The military claims to have taken a few neighbourhoods on the eastern outskirts of the city. Al Jazeera' Gerald Tan reports. - Subscribe to our channel: http://bit.ly/AJSubscribe - Follow us on Twitter: https://twitter.com/AJEnglish - Find us on Facebook: https://www.facebook.com/aljazeera - Check out our website: http://w…	0.0566156	2015-12-23T22:45:35.000Z	0.05661561	0.06415424	0.040079407	battle for mosul	war & conflict	20
691	WZrZeepjpnk	News Bulletin - 03:35 GMT update	Subscribe to our channel http://bit.ly/AJSubscribe The main headlines on Al Jazeera English, featuring the latest news and reports from around the world. Website: http://www.aljazeera.com/ Facebook: https://www.facebook.com/al... Twitter: https://twitter.com/AJEnglish Subscribe to our channel http://bit.ly/AJSubscribe	0.0566712	2014-03-23T15:27:34.000Z	0.05667115	0.029683022000000007	0.010662374	media	media	11
692	zr2j7jChkmQ	Viewfinder - Latin America: Cuba Calling promo	Subscribe to our channel http://bit.ly/AJSubscribe Change is coming to Cuba… slowly. For this remote community and on Estrella’s front porch, it is just a phone call away.	0.0567287	2014-02-18T20:38:34.000Z	0.05672868	0.09777833	0.09535232	latin america	latin america	10
693	9RzLbcxlQAY	Techknow - Faux Rhino Horn promo	Science is fighting back against rhino hunting.	0.0568046	2016-12-09T01:24:54.000Z	0.056804605		0.122715935	science & technology	science & technology	17
694	HuvbQXNfvKg	Bangladesh juvenile justice system under the spotlight	In Bangladesh children as young as nine can be convicted of a crime. Many children say they have been mistreated in the juvenile justice system. There have even been riots in juvenile centres across the country. Al Jazeera's Maher Sattar reports from Tongi.	0.0568656	2014-05-26T13:47:40.000Z	0.056865572999999996	0.11206823	0.12602949	asia	asia	3
695	sTRtw5Hy9N4	France: Scientists drill Mont Blanc to create global archive of glacial ice	Over the last few days scientists have been drilling deep into the side of Mont Blanc in France to remove cores of glacial ice. They hold clues about the planet's past climate and are set to be preserved in one of the most remote places on Earth. Al Jazeera’s science editor Tarek Bazley reports. - Subscribe to our channel: http://aje.io/AJSubscribe - Follow us on Twitter: https://twitter.com/AJEn…	0.0568883	2016-08-24T19:36:45.000Z	0.056888264	0.01895963	0.00794545	europe	europe	6
696	VdCsiNnC4CM	Al Jazeera gains exclusive access to Boko Haram's former base	At least 26 people have been killed and eighty-two injured in attacks in northeast Nigeria. Emergency services say two suicide bombers struck a market in the town of Madagali in Adamawa State. The armed group Boko Haram is suspected to be behind those attacks. Al Jazeera's Ahmed Idris has been given exclusive access to film in what was once Boko Haram's most fortified base. - Subscribe to our cha…	0.056924	2015-12-29T10:39:56.000Z	0.056924025999999996	0.02848582	0.11183632	africa	africa	1
697	LkiCEX7hDmU	The Stream - What would you ask Julian Assange?	Subscribe to our channel http://bit.ly/AJSubscribe Wikileaks founder Julian Assange discusses the future of online whistleblowing and the upcoming trial of Bradley Manning. At Al Jazeera English, we focus on people and events that affect people's lives. We bring topics to light that often go under-reported, listening to all sides of the story and giving a 'voice to the voiceless.' Reaching more t…	0.0569382	2013-06-21T07:00:20.000Z	0.050682236	0.0547207	0.014750211	media	media	11
698	JDP4kbfzA5Q	Stream Leads 30/10/2012	Subscribe to our channel http://bit.ly/AJSubscribe Instagramming & GIFing Hurricane Sandy, Cyclone Nilam At Al Jazeera English, we focus on people and events that affect people's lives. We bring topics to light that often go under-reported, listening to all sides of the story and giving a 'voice to the voiceless.' Reaching more than 270 million households in over 140 countries across the globe, o…	0.0571506	2012-10-31T02:40:36.000Z	0.05715058	0.020574037	0.019042382	media	media	11
699	b8fgq8_Y1l8	Lifelines - Eliminating rabies, one island at a time	Subscribe to our channel http://bit.ly/AJSubscribe Subscribe to our channel http://bit.ly/AJSubscribe In the Philippines, the department of health and the department of agriculture, have teamed up to create a programme to help eliminate rabies, one island at a time. Enrique Tayag, assistant secretary of health designate, said that rabies is an ongoing problem in the country. 'Roughly every year, …	0.0571527	2017-07-25T04:25:15.000Z	0.057152725999999994	0.35640255	0.023964236	asia pacific	asia	3
700	sfucACnv-f4	Chinese businessman to invest $3bn in Ukraine	It is not just Russia and the EU that are fighting for closer ties to Kiev. China has pledged to invest three billion dollars in one of Ukraine's most strategic ports. Al Jazeera's David Chater reports from Sevastopol.	0.057182	2013-12-08T10:53:41.000Z	0.057181954000000014	0.05077391	0.016899586	business & economy	business & economy	4
701	9HtdQzV7W9k	Argentina voices support for whale sanctuary	Japan and other pro-whaling nations have rejected a proposal to create a sanctuary for whales in the South Atlantic. Conservation groups in Argentina and other countries in the region argue that a protected area is vital to ensure the mammals' future. Al Jazeera’s Teresa Bo reports from the Valdes Peninsula, on Argentina's Atlantic coast. - Subscribe to our channel: http://aje.io/AJSubscribe - Fo…	0.0574758	2016-10-30T07:20:59.000Z	0.05747582	0.19852513	0.039506547	africa	africa	1
702	eDfY64yKBmA	UN-backed peace talks planned for Yemen conflict	UN-backed peace talks to end the conflict in Yemen are set to take place next week. The President has reportedly agreed to attend after meeting the UN envoy in Aden on Saturday. Gerald Tan reports. - Subscribe to our channel: http://bit.ly/AJSubscribe - Follow us on Twitter: https://twitter.com/AJEnglish - Find us on Facebook: https://www.facebook.com/aljazeera - Check out our website: http://www…	0.0575241	2015-12-06T10:00:02.000Z	0.057524133	0.2890239	0.09466656	middle east	middle east	12
703	ldiIIbgjkyQ	Income for all	Subscribe to our channel http://bit.ly/AJSubscribe On The Stream: The fight to bring basic income to Switzerland and what that means globally. Subscribe to our channel http://bit.ly/AJSubscribe At Al Jazeera English, we focus on people and events that affect people's lives. We bring topics to light that often go under-reported, listening to all sides of the story and giving a 'voice to the voicel…	0.0576129	2014-03-22T02:15:13.000Z	0.06790222	0.011813266999999999	0.014046867	media	media	11
704	_QZb7jH9Bro	The Stream - Charting Mexico's media landscape	Subscribe to our channel http://bit.ly/AJSubscribe Follow The Stream and join Al Jazeera's social media community: This episode's story: http://stream.aljazeera.com/story/201404282010-0023675 FACEBOOK: http://www.facebook.com/AJStream TWITTER: https://twitter.com/AJStream GOOGLE+: http://google.com/+TheStream ****************************************­************ On The Stream: How telecom reforms…	0.0576367	2014-04-29T03:01:27.000Z	0.05763673	0.00962929	0.076863855	media	media	11
705	YrcOXijlB58	Young filmmakers seek spotlight at Sundance festival	For many young filmmakers, getting exposure at the Sundance festival is a dream come true. The festival features short films from the US and more than 20 other countries. Those who get recognised usually move on to bigger Hollywood projects. Al Jazeera’s Rob Reynolds reports from Park City, Utah. - Subscribe to our channel: http://aje.io/AJSubscribe - Follow us on Twitter: https://twitter.com/AJE…	0.0577288	2017-01-23T09:35:10.000Z	0.057728842	0.02809709	0.008549252	arts & culture	arts & culture	2
706	RXkhxE_bukw	US pushes for new Yemen peace initiative	Earlier, Kerry was in Saudi Arabia pushing forward a peace plan for Yemen. He has called for a unity government for the fractured country. Kerry met representatives from the UK and Gulf countries. At least 6500 people - half of them civilians - have died in the last year and a half of fighting. Al Jazeera’s Caroline Malone reports. - Subscribe to our channel: http://aje.io/AJSubscribe - Follow us…	0.0579584	2016-08-27T06:42:47.000Z	0.014267926	0.06018011	0.04486625	middle east	middle east	12
707	1Nc04ezT3Ys	Once Upon a Time in Punchbowl - Coming Soon promo	Subscribe to our channel http://bit.ly/AJSubscribe The Lebanese Civil War forced around 30,000 Muslims and Christians to flee their homeland and join an exodus to Australia to start new lives. More on our website: http://aljazeera.com Follow us on Twitter: http://twitter.com/AJEngligh Subscribe to our channel: http://bit.ly/AJSubscribe Find us on Facebook: http://facebook.com/aljazeera	0.0579672	2015-03-09T12:28:59.000Z	0.05796718	0.07842819999999999	0.047042385	middle east	middle east	12
708	4iUea9ZXSl8	Egypt to release Al Jazeera's Elshamy	After ten months in an Egyptian prison, Al Jazeera journalist Abdullah El Shamy is due to be released. The 26-year-old correspondent has also been on hunger strike for the last five months - protesting his detention without charge. And now the public prosecutor has ordered him to be freed. But three other Al Jazeera journalists are still being held. Al Jazeera's Erica Wood reports.	0.05798	2014-06-17T09:51:54.000Z	0.036664825		0.05743987	egypt	middle east	12
709	GXUMPZNlglU	Talk to Al Jazeera - Osama Al Nujaifi promo	Subscribe to our channel http://bit.ly/AJSubscribe One of Iraq's most influential Sunni leaders is calling for an international conference to end the Sunni-Shiite conflict.	0.0580808	2014-03-13T01:18:59.000Z	0.05808077	0.17585376	0.12930739	iraq	middle east	12
710	dthRFa9ePus	UK Gallery Transports Artists Virtually	A gallery in the UK is transporting artists from the Middle East and Africa virtually. It's a way around their inability to obtain visas to show their work themselves.	0.0581375	2017-01-23T12:06:48.000Z	0.05813747	0.05883339	0.12492131	africa	africa	1
711	KXk55AD1Fx4	News headlines : Taliban Release	Subscribe to our channel http://bit.ly/AJSubscribe The main headlines on Al Jazeera English, featuring the latest news and reports from around the world. http://www.aljazeera.com/	0.0582004	2014-06-02T21:23:28.000Z	0.058200392999999996	0.114273585	0.016473992	afghanistan	middle east	12
712	dBUZ9ZbweBI	Argentina's 'loony radio' - The Listening Post (Feature)	More than 20 years ago, a psychology student doing his training at one of Argentina's oldest psychiatric wards kept being asked by his family and friends what it was like to work in there. So he came up with an idea: to let the patients explain in their own words. The first radio station to broadcast from inside a mental hospital was born. Radio La Colifata - slang for loon, crazy person, has bee…	0.0582243	2015-04-20T19:44:37.000Z	0.03667399	0.3086587	0.049997583	latin america	latin america	10
713	vssLyY-oc_g	Spain, the driving force behind padel	Padel has overtaken tennis in terms of popularity in Spain. It's easy and fun and this guide will help you take it up. Manuela Lanza reports for Al Jazeera	0.0582951	2014-05-23T03:17:33.000Z	0.05829512	0.30215436	0.07720942	europe	europe	6
714	uFZqpCWNv_0	Chilean city at standstill after strong quake	There have been more aftershocks in northern Chile following a magnitude 8.2 earthquake on Wednesday. Residents in the hardest hit city of Iquique have been sleeping outdoors, fearing their homes might collapse, while merchants from neighbouring Bolivia are stranded due to blocked roads. Businessmen and labourers are also struggling to get back on their feet following damage to both public infras…	0.0582983	2014-04-04T18:41:12.000Z	0.058298315999999996	0.06756572	0.052995153	europe	europe	6
715	rwfKp9mmq40	UpFront - Saeb Erekat: 'I don't aspire to be a president' (web extra)	Palestinian chief negotiator Saeb Erekat says he does not 'intend' to be a president. In July, Erekat was promoted to PLO secretary-general. When pressed by Mehdi Hasan on whether he would never be president of the Palestinian Authority, Erekat responds, 'I don't intend, I don't wish, I don't aspire to be a president, I aspire and wish to go back to being a university professor.'	0.0583073	2015-10-24T15:55:07.000Z	0.0583073	0.2181741	0.12686291	israeli–palestinian conflict	israel-palestine	9
716	E1_YRz-_oYk	Egypt voting extended amid poor turnout	Concerns about a low turnout in Presidential elections have prompted authorities to extend voting for a third day. The election commission's blaming the weather for preventing people from coming out. But critics say the public's actually giving its own verdict on the two candidates, by voting with their feet and staying at home. Al Jazeera's Omar Al Saleh reports.	0.0583082	2014-05-28T15:58:29.000Z	0.05757615	0.24310255	0.048221025999999986	politics	politics	13
717	eO-0shbEFPc	Let Us Talk - Witness	Subscribe to our channel http://bit.ly/AJSubscribe Can a single voice over the radio move listeners beyond the pain and anger of recent memories - violence that pit neighbours against each other, the exploitation of child soldiers, unimaginable atrocities, and the displacement of millions?At Al Jazeera English, we focus on people and events that affect people's lives. We bring topics to light tha…	0.0583659	2013-09-25T07:29:09.000Z	0.043191552	0.049052525	0.08165374	media	media	11
718	7RU7Rm8OfpI	Beatles fans mark 50 years on first US visit	It was 50 years ago when the Beatles first arrived in the United States. Beatlemania was in its prime as the music chart-toppers, brought a new era of pop music to adoring screaming fans. It was the start of what became known as the British Invasion in America. Al Jazeera's Kristen Saloomey in New York, takes a look back at one of the most celebrated bands in history.	0.0583813	2017-02-03T03:27:36.000Z	0.058381256	0.033516023	0.06262497	arts & culture	arts & culture	2
719	RvLtQJMjyBI	Myanmar battling high youth unemployment	Subscribe to our channel http://bit.ly/AJSubscribe Despite a series of economic reforms, Myanmar continues to suffer from high youth unemployment. Most big business dried up under almost 50 years of army rule and the resulting international economic sanctions. As host of the World Economic Forum on East Asia, the country is hoping show much it has opened up to the world over the past couple of ye…	0.0584982	2013-06-08T07:30:14.000Z	0.12167205	0.11427972	0.019795572	business & economy	business & economy	4
720	Q6hnHQz5eiU	Iraqi forces take control of ISIL tunnels in Fallujah	Iraqi forces advancing on Fallujah have discovered a network of intricate tunnels built by the Islamic State of Iraq and the Levant (ISIL, also known as ISIS) group, near the southern edge of the city. The operation commander of the forces says victory is in sight, but the situation for around 90,000 civilians remains dire. Al Jazeera’s Osama Bin Javaid reports. - Subscribe to our channel: http:/…	0.0585262	2016-06-21T05:38:39.000Z	0.044772994	0.15702635	0.029479883999999998	iraq	middle east	12
721	SF9rv5MU35o	Malians gear up for presidential runoff	Voters in Mali are heading to the polls in the second round of the Presidential election. It is an important step towards reestablishing democracy in the country after last year's military coup. Al Jazeera's Ahmed Idris reports from the capital Bamako.	0.0585289	2013-08-11T12:25:53.000Z	0.05852885	0.11570768	0.07232753	africa	africa	1
722	g0rnc6M9ZLI	Week of November 20	This week, Earthrise meets bridman Martin Wheeler, who takes to the skies to help protect elephants in Kenya; Innovate Africa looks at home-grown innovations in the feild of education; and we get a perspective on World War One Through Arab Eyes.	0.0585747	2016-02-09T09:43:55.000Z	0.05857471700000001	0.016216401000000002	0.050782423	africa	africa	1
723	qOSbRLQqUf4	On Al Jazeera: India launches world's first solar-powered airport	Some of our stories from around the globe: - Desperate migrants continue to flood Greek island of Kos - Sri Lanka's election victors look to form new government - India launches world's first solar-powered airport All this and more at http://www.aljazeera.com/ Subscribe to our channel http://bit.ly/AJSubscribe Follow us on Twitter https://twitter.com/AJEnglish Find us on Facebook https://www.face…	0.0587682	2015-10-29T09:54:48.000Z	0.055807817999999995	0.03147848	0.12551367	asia	asia	3
724	e93MaEwrsfc	Al Jazeera English Live Stream	Al Jazeera English Live Stream	0.0587869	2014-02-07T14:15:14.000Z	0.065884225	0.35364429999999997	0.3536443	united kingdom	europe	6
725	EyHQ1rN4ois	South Africans set to bid Mandela farewell	South Africans are preparing to say goodbye to the anti-apartheid icon on December 10, the scheduled date for Mandela's official memorial services. His remains will then lie in state at the seat of government in Pretoria for three days. But even before then, South Africans will have the chance to remember the man who changed their country forever. Al Jazeera's Haru Mutasa reports from Soweto.	0.0589661	2013-12-07T15:03:58.000Z	0.05896612	0.12380227	0.11634745	politics	politics	13
726	yQ8Hf9BFhMc	Myanmar students march against new education law	A so-called long march movement by students in Myanmar is growing in size against a new controversial education law. The protesters are walking 600km from Mandalay to Myanmar's biggest city, Yangon, in demonstration against perceived curbs on educational freedoms. Al Jazeera's Erica Wood explains. Subscribe to our channel http://bit.ly/AJSubscribe Follow us on Twitter https://twitter.com/AJEnglis…	0.0590908	2015-01-29T15:47:28.000Z	0.059090797	0.19395557	0.061304532	myanmar	asia	3
727	p99KIJHdgms	Hungry for Change - Witness	Subscribe to our channel http://bit.ly/AJSubscribe Subscribe to our channel http://bit.ly/AJSubscribe Food is at the core of human survival - it can be at the heart of a family's traditions and the key to a nation's cultural identity. It has also been the source of war, conflict and devastation. Natural disasters can wipe out the food supply of an entire country but what happens when you live in …	0.0591398	2016-10-30T17:56:02.000Z	0.10172408	0.0656053	0.02990003	business & economy	business & economy	4
728	prn5rvTIJ20	WHO hopes for cheaper Hepatitis C drugs	Dramatic advances in the treatment of Hepatitis C have been showcased in London. But the World Health Organisation says drugs that offer a cure for the liver destroying virus are unaffordable for most. The global body wants to revolutionise the way Hepatitis C is treated, particularly in poorer countries. Al Jazeera's Nadim Baba reports from London.	0.0591493	2014-04-09T16:53:26.000Z	0.059149288	0.45710766	0.06635930000000001	europe	europe	6
729	5NFDTv35cZc	UK art exhibition traces history of colour	An exhibition in the National Gallery in London is tracing the history of colour in Western paintings from the Middle Ages to the end of the 19th century. It shows the materials artists used to make colours, and the technical challenges they overcame to master them and create iconic pieces of art. Al Jazeera's Barnaby Phillips reports from London. Subscribe to our channel http://bit.ly/AJSubscrib…	0.0591673	2017-09-12T15:46:50.000Z	0.0068720737	0.12606023	0.010871171	arts & culture	arts & culture	2
730	Xy74sZaPZ4E	Tens of thousands gather to honour Mandela	Tens of thousands of people, dozens of heads of state and countless dignitaries gathered in South Africa to pay tribute to one man. It was a mass memorial for Nelson Mandela, the former prisoner, former president and Nobel Peace Prize winner. Al Jazeera's Mike Hanna reports from Johannesburg.	0.0593537	2013-12-14T06:36:56.000Z	0.06410310400000001	0.04259323	0.017623365	africa	africa	1
731	N4GRciuQuMw	Al Jazeera World - The Wooden Rifle	Five young Lebanese in Beirut reflect on how their lives have been affected by their country's civil war and its legacy.	0.0593643	2015-09-02T08:34:33.000Z	0.08332366	0.11305017	0.052012026	lebanon	middle east	12
732	FYoM48I6uOQ	Al Jazeera World - The Golden Boys	Subscribe to our channel http://bit.ly/AJSubscribe The story of the men of Bosnia and Herzegovina's sitting volleyball team who, overcoming war injury and disability, competed for gold at the London paralympics. At Al Jazeera English, we focus on people and events that affect people's lives. We bring topics to light that often go under-reported, listening to all sides of the story and giving a 'v…	0.0594108	2014-06-25T13:07:58.000Z	0.06462256	0.11793787	0.010245791	europe	europe	6
733	b5Fou3M5SFQ	Macri takes office in divided Argentina	Mauricio Macri is taking office this Thursday but tough challenges await ahead as Argentina is in debt, and inflation is soaring. Al Jazeera's Teresa Bo reports from Buenos Aires, where people hope he'll deliver on his promise to improve the economy. - Subscribe to our channel: http://bit.ly/AJSubscribe - Follow us on Twitter: https://twitter.com/AJEnglish - Find us on Facebook: https://www.faceb…	0.0594168	2015-12-10T09:08:30.000Z	0.059416838	0.17763710000000002	0.018984187	africa	africa	1
734	2CE9IHaVuTU	Comet-chasing probe set to wake up	A European spacecraft has begun one of the most technologically advanced missions ever attempted. The Rosetta probe was launched a decade ago on a long quest to chase down and land on a comet. As it wakes from almost thee years in hibernation, it's hoped its systems are still intact. Al Jazeera's Tarek Bazley reports.	0.059506	2014-01-20T17:38:06.000Z	0.05950596599999999	0.066313796	0.013709732	europe	europe	6
735	ydTHBkh_-4Q	Malaria breakthrough: Can it be eradicated?	The vaccine is called RTS,S and is designed for children in Africa. It would be the first licensed human vaccine against a parasitic disease and could help prevent millions of cases of malaria, which currently kills more than 600,000 people a year. The shot is expected to be approved for use in the continent from October after final trial data showed it offered partial protection for up to four y…	0.059564	2015-04-29T06:25:00.000Z	0.053617164	0.19930504	0.05683435	health	health	7
736	kY-0jRw4Lpo	News: Taiwan Election promo	- Subscribe to our channel: http://bit.ly/AJSubscribe - Follow us on Twitter: https://twitter.com/AJEnglish - Find us on Facebook: https://www.facebook.com/aljazeera - Check out our website: http://www.aljazeera.com/	0.0596332	2016-01-14T07:07:34.000Z	0.08286043	0.03566096	0.008985428	africa	africa	1
737	CgxK5mnMIRE	Leaders of Umbrella Movement join Hong Kong poll fray	Voters go to the polls in Hong Kong on Sunday. It will be the first local elections since the Umbrella Occupy Movement last year. Some activists from those protests now want to use the vote to push for change. Al Jazeera's Rob McBride reports. Subscribe to our channel: http://bit.ly/AJSubscribe Follow us on Twitter: https://twitter.com/AJEnglish Find us on Facebook: https://www.facebook.com/aljaz…	0.059648	2015-11-21T15:52:43.000Z	0.05964803	0.03145171	0.023927063	politics	politics	13
738	BODoZDQijvw	Spacecraft catches comet after 10-year chase	The European spacecraft Rosetta has become the first ever probe to catch up with and manoeuvre alongside a comet, a landmark stage in a decade-long mission that scientists hope will help unlock some of the secrets of the solar system. Al Jazeera's Nadim Baba reports. Subscribe to our channel http://bit.ly/AJSubscribe Follow us on Twitter https://twitter.com/AJEnglish Find us on Facebook https://w…	0.0597836	2014-08-07T10:18:04.000Z	0.025142305	0.037603267	0.025868922000000003	europe	europe	6
739	JV15B_yg_LY	Senegal approves rent reduction bill	Senegal's parliament has passed a bill that forces landlords to reduce the amount of rent they collect from tenants. Depending on the type of property, rent will be reduced by 20 percent and those who fail to comply will face three months in jail and a $4,000 fine. Over the past 20 years, rents have increased by 250 percent in Dakar, making it the most expensive city in Africa with housing prices…	0.0598106	2014-02-04T07:20:34.000Z	0.059810624000000014	0.115157515	0.06461419	africa	africa	1
740	iH3guocWE_E	AIDS conference closes with challenges in sight	The International Aids Conference in Durban, South Africa has ended. Attendees have applauded the progress made and paused for thought at the huge task that lies ahead. Scientists revealed new hope this week with promising results from a vaccine trial, but news also emerged that most donor countries have cut AIDS funding. Al Jazeera’s Tania Page reports from Durban. - Subscribe to our channel: ht…	0.0598658	2016-07-23T08:22:17.000Z	0.05986585	0.20916152	0.12495378	africa	africa	1
741	Vk50VPQhBVs	Thousands left homeless after massive cyclone hits Vanuatu	International relief supplies began arriving in the country on Sunday. The count of total confirmed deaths was at eight with 30 people injured, according to authorities. Tolls are expected to rise. The category five cyclone, the most severe on the scale, ripped through the island nation early on Saturday. Al Jazeera's Kim Vinnell reports. More on our website: http://aljazeera.com Follow us on Twi…	0.05987	2015-03-15T20:43:43.000Z	0.038851082	0.37243536	0.018019551	asia pacific	asia	3
742	YVm3ZMDiZrk	Hollande's China trip key to global climate talks	French President, Francois Hollande is expected to arrive in China on Monday to discuss climate change. The negotiations could be crucial to his efforts to secure a global climate deal in Paris next month. Rob McBride reports from Beijing.	0.0599352	2015-11-02T06:01:00.000Z	0.05993519	0.15681525	0.014806397	china	asia	3
743	BWjdxE8_JVc	Central African Republic struggles to disarm rebels	A major challenge facing the newly-elected government in Central African Republic is to take away weapons from various armed groups. Rival militias hold huge arms caches, following a sectarian conflict that began in 2013. Fighting has since subsided but, disarming the groups has been a struggle. Al Jazeera gained rare access to one of the country's most powerful rebel leaders. Al Jazeera’s Cather…	0.0599781	2016-07-26T13:53:48.000Z	0.059978099999999986	0.23754409	0.028509974	africa	africa	1
744	stzMdFdGBZY	People & Power - Kagame promo	Subscribe to our channel http://bit.ly/AJSubscribe Twenty years on from the Rwandan Genocide, is the country's president a hero or a villain? Subscribe to our channel http://bit.ly/AJSubscribe	0.0600595	2014-04-03T07:16:42.000Z	0.10033603	0.056822337	0.23754409	media	media	11
745	9cesfVaQA5I	Art meets technology to create a dazzling experience in Japan	Art and technology have collided in one of Japan's biggest ever exhibitions. The three-thousand square metre showcase in Tokyo is a dazzling display of light and interactive experiences for art lovers. - Subscribe to our channel: http://aje.io/AJSubscribe - Follow us on Twitter: https://twitter.com/AJEnglish - Find us on Facebook: https://www.facebook.com/aljazeera - Check our website: http://www…	0.0601182	2016-09-03T13:18:25.000Z	0.06893826	0.013581716	0.010278904	arts & culture	arts & culture	2
746	QFYM1clKxt0	China-South Korea trade talks top regional summit	Subscribe to our channel http://bit.ly/AJSubscribe Subscribe to our channel http://bit.ly/AJSubscribe The South Korean President is scheduled to meet her Chinese counterpart on Thursday during a state visit to China. Travelling with Park Geun Hye is the biggest business delegation to accompany a South Korean president abroad. Al Jazeera's Florence Looi reports from Seoul. At Al Jazeera English, w…	0.0601512	2013-07-02T11:54:14.000Z	0.060151237999999996	0.029080052000000002	0.010825992	asia pacific	asia	3
747	1aJ_FiouA8Y	earthrise - Re-energising Bhubaneswar	Subscribe to our channel http://bit.ly/AJSubscribe An Indian city's experiment with renewable energy drawn out of necessity spreads well beyond small businesses to ratepayers. Amanda Burrell discovers that the idea of energy-efficient bulbs is spreading fast to the people across Bhubaneswar. At Al Jazeera English, we focus on people and events that affect people's lives. We bring topics to light …	0.0602098	2012-08-04T14:12:25.000Z	0.06020982	0.23754409	0.013074106	media	media	11
748	jn8NBu0Mz7s	Egyptians head to polls in parliamentary elections	Egyptians are heading to the polls in the latest stage of parliamentary elections. The figure for voter turnout will be closely watched as an indicator of confidence, or lack of it, in the political process as Al Jazeera's Rob Matheson reports. Subscribe to our channel http://bit.ly/AJSubscribe Follow us on Twitter https://twitter.com/AJEnglish Find us on Facebook https://www.facebook.com/aljazee…	0.0602832	2015-11-22T08:27:17.000Z	0.060283244000000014	0.1239415	0.05356338	politics	politics	13
749	mA8Za6szG5Y	Germany sticks to 'go-green' goals	German Chancellor Angela Merkel has said she will stand by her decision to switch Germany to 80 percent renewable energy electricity by 2050. The German government was already providing financial incentives for wind and solar energy before the Fukushima nuclear disaster led it to announce a sudden shift. All German nuclear plants will shut down by 2022, but this decision has caused government sub…	0.0604848	2014-01-23T10:54:57.000Z	0.060484804	0.22671813	0.12831569	business & economy	business & economy	4
750	rQGEakIhddo	Warnings of avalanches and flash floods in northern Pakistan	Forecasters in Pakistan are warning that heavy rain and snowfall in the next few days could trigger flash floods or avalanches in the north. It's home to the largest glaciers outside the polar regions, and some of the highest mountain ranges in the world. Al Jazeera’s Kamal Hyder reports from Passu. - Subscribe to our channel: http://aje.io/AJSubscribe - Follow us on Twitter: https://twitter.com/…	0.0604868	2017-02-04T18:49:18.000Z	0.026164819	0.13333061	0.034494273	asia	asia	3
751	7SPU2ue8OXQ	Global Pop Art explodes in London exhibit	Think of Pop Art from the 1960s and America's Andy Warhol and his soup cans may spring to mind. But that is just a tiny representation of Pop Art. A new exhibition at London’s Tate Modern looks at how the world outside the US has interpreted the genre. Subscribe to our channel http://bit.ly/AJSubscribe Follow us on Twitter https://twitter.com/AJEnglish Find us on Facebook https://www.facebook.com…	0.0605934	2015-09-16T13:17:06.000Z	0.037154835	0.10769089	0.020856922	arts & culture	arts & culture	2
752	uCiqZlcKC0k	The Stream - Lessons from the rise of Reddit	Subscribe to our channel http://bit.ly/AJSubscribe On The Stream: Internet entrepreneur and Reddit co-founder Alexis Ohanian At Al Jazeera English, we focus on people and events that affect people's lives. We bring topics to light that often go under-reported, listening to all sides of the story and giving a 'voice to the voiceless.' Reaching more than 270 million households in over 140 countries…	0.0605955	2013-11-07T19:16:11.000Z	0.060595457	0.047004595	0.009233329	media	media	11
753	JMenUxnnKc4	Colombia and FARC set to sign historic peace pact	Colombia's government and FARC rebels will sign a historic peace agreement later on Monday. Dozens of heads of state and other dignitaries - including US Secretary of State John Kerry - will be there. But some question whether the deal will bring peace. Al Jazeera's Latin America Editor Lucia Newman reports from Bolivar, Colombia. - Subscribe to our channel: http://aje.io/AJSubscribe - Follow us …	0.0607957	2016-09-26T14:06:26.000Z	0.060795713	0.03637235	0.017783197	latin america	latin america	10
754	AQQuqdXpqns	Former NFL linebacker helps ‘adaptive athletes’	David Vobora left the NFL and went back to the gym with a plan to train professional athletes. Now Vobora works with adaptive athletes. Al Jazeera’s Kristen Saloomey reports from Dallas, Texas. - Subscribe to our channel: http://aje.io/AJSubscribe - Follow us on Twitter: https://twitter.com/AJEnglish - Find us on Facebook: https://www.facebook.com/aljazeera - Check our website: http://www.aljazee…	0.0608046	2017-07-01T22:38:10.000Z	0.025629647000000002	0.029384619	0.019530637	europe	europe	6
755	3Wg2k0ZO4xg	Witness - Kisilu: The Climate Diaries promo	A Kenyan love story from the frontline of climate change.	0.0608263	2015-11-02T21:43:45.000Z	0.11223863	0.059053354	0.102961816	climate sos	environment & weather	5
756	-YoQzkzW4yI	Former Thai PM placed under house arrest	Thailand's former Prime Minister, Yingluck Shinawatra, detained a day after a military coup, which the army insists was neccessary to restore peace and order. Meanwhile, in a show of force on the streets, soldiers quickly dispersed protesters who gathered to demand elections. Al Jazeera's Veronica Pedrosa reports from Bangkok.	0.0608339	2014-05-24T00:15:09.000Z	0.060833912000000004	0.055420805	0.05822754	latin america	latin america	10
757	Nr3goEZynho	The Stream - In conversation with Chimamanda Ngozi Adichie	Follow The Stream and join Al Jazeera’s social media community: This episode’s story: http://stream.aljazeera.com/story/201609011945-0025275 FACEBOOK: http://www.facebook.com/AJStream TWITTER: https://twitter.com/AJStream GOOGLE+: http://google.com/+TheStream **************************************************** On The Stream: In conversation with the critically acclaimed author and pop culture ic…	0.060902	2017-09-09T15:15:11.000Z	0.05089318	0.23754409	0.02836049	arts & culture	arts & culture	2
758	B7SglDSNPvY	Fears of uprising as Sudan's economy worsens	The economy of Sudan has been suffering since South Sudan became an independent country in 2011. The value of the currency has fallen and unemployment is rising. Inflation rose sharply last year, reaching 44 percent by December, with much of the rise coming from basic food items such as meat, fruit, and milk. With the government blamed for the situation, fears of a public rising are rife. Al Jaze…	0.0609234	2016-05-30T15:58:41.000Z	0.04648783	0.116747364	0.026535297000000003	africa	africa	1
759	R1RJCsBCs9U	News Bulletin - 14:35 GMT update	Subscribe to our channel http://bit.ly/AJSubscribe The main headlines on Al Jazeera English, featuring the latest news and reports from around the world.At Al Jazeera English, we focus on people and events that affect people's lives. We bring topics to light that often go under-reported, listening to all sides of the story and giving a 'voice to the voiceless.' Reaching more than 270 million hous…	0.0609575	2014-12-01T15:33:14.000Z	0.06095748	0.029683005	0.010673018	europe	europe	6
760	IpB_rrKHS1k	Featured Documentary - 14 Up South Africa Part 2 promo	Subscribe to our channel http://bit.ly/AJSubscribe In 1999 we revisit the 20 South African children filmed 7 years previously, now aged 14, talking about race, relationships, fear and God in the new SA.	0.0610052	2013-12-09T09:05:13.000Z	0.06100521	0.04632089	0.028117402000000003	africa	africa	1
761	zBJwyquiRmY	Myanmar's wine industry is thriving	Myanmar's lack of a winter season means grape vines produce two crops a year. With year-round labour and careful attention, their wine industry is thriving. Al Jazeera's Florence Looi reports from Shan State, Myanmar.	0.0610099	2015-03-25T18:46:07.000Z	0.06100986	0.04377383	0.027302926	myanmar	asia	3
762	oyDl-gTepNQ	Costa Rica slum community centre fights poverty	Costa Rica is one of the wealthiest countries in Central America, but a slum in the capital of San Jose, known as Carpio, has been left behind. The district is synonymous with poverty, drugs and violence, but an unusual community centre is starting to make a difference. Al Jazeera’s John Holman has more. - Subscribe to our channel: http://aje.io/AJSubscribe - Follow us on Twitter: https://twitter…	0.0610194	2016-07-13T15:03:51.000Z	0.0063868747	0.36418626	0.118750565	united states	us & canada	19
763	oPHzbxwxQEA	Listening Post - Dec 2014 Generic promo	Subscribe to our channel http://bit.ly/AJSubscribe A weekly programme that examines and dissects the world's media.	0.0610649	2014-12-16T20:48:42.000Z	0.06106491	0.060978815	0.061388727	media	media	11
764	X_k5uT1OHz8	Detentions in China continue to worry exiled dissidents	Security officials in China have released the family members of two dissidents living abroad. The family members were detained in an apparent hunt for the anonymous authors of a letter calling for President Xi Jinping to resign. It's believed several other people are still being held. Al Jazeera's Florence Looi reports from Beijing. - Subscribe to our channel http://bit.ly/AJSubscribe - Follow us…	0.0610826	2016-04-01T13:15:40.000Z	0.031362854	0.30176878	0.051931757	china	asia	3
765	GYy0J_A3Dvc	Women Make Change - Scorecard Rwanda	'[Sport] is a powerful tool for progress and for development,' said UN Secretary-General Ban Ki-moon in 2011. In post-genocide Rwanda, Felicite Rwemalika's work is an embodiment of this idea. She has forged opportunities which have brought increased wealth and skills to women and their families - all by getting women to play football. Rwemalika used to run a beauty salon, where she encountered ma…	0.0610892	2017-05-02T13:21:52.000Z	0.14889270000000002	0.3889421	0.070885815	sport	sport	18
766	5tdKuD1zreI	Football clubs curbing journalists' rights and freedom	Swindon Town Football Club has decided that a local newspaper, the Swindon Advertiser, will not be allowed into the stadium. The club will use its own social media platforms to release news about the team. TV channels at other notable clubs now often control player and manager interviews, even banning journalists for being criticial of the club and its owner. Lee Wellings reports.	0.0611051	2015-09-20T13:08:45.000Z	0.061105084000000004	0.17410779	0.008728033	media	media	11
767	xDSVf-zNpvo	The Stream - Art and activism	On The Stream: The impact art has on political activism and the cultural changes made when the two collide.	0.0612309	2016-11-30T13:23:05.000Z	0.04711516		0.07029756	arts & culture	arts & culture	2
768	XOwcu_vIWh8	Messaging apps: The future of news - The Listening Post (Feature)	More people are now using mobile messaging apps like Telegram, Whatsapp, WeChat and Kakao Talk than social media networks like Facebook, Twitter and Weibo. News outlets have cottoned on to the trend and are messaging headlines directly to your phone. But there's more to look out for: rumours, propaganda and even some political discussions that you cannot have as easily on the web. As amateur and …	0.0612567	2016-05-02T07:18:20.000Z	0.044028500000000005	0.017132461	0.026428367999999997	science & technology	science & technology	17
769	qIxj9p9qZgQ	Malaysia enacts controversial security law	A controversial security law that went into effect in Malaysia on Monday has given sweeping new powers to a council led by Prime Minister Najib Razak. The government says it needs the legislation to help fight what it calls terrorism, but critics say the 'draconian' law threatens democracy. Al Jazeera’s Karishma Vyas reports from Kuala Lumpur. - Subscribe to our channel: http://aje.io/AJSubscribe…	0.061317	2016-08-02T13:02:12.000Z	0.07000727	0.13083349	0.11026504	africa	africa	1
770	E2O0bHhsSuk	Lebanon's Bekaa farmers hit by Syria-Jordan border closure	Farmers in Lebanon's Bekaa Valley have had a bumper harvest but say they are still losing much needed revenue. They are struggling to get their goods to market because the border between Syria and Jordan, which they used to export produce to Arab Gulf countries, is closed. Al Jazeera’s Natasha Ghoneim reports from Bekaa Valley. - Subscribe to our channel: http://bit.ly/AJSubscribe - Follow us on …	0.0613621	2016-06-18T22:25:59.000Z	0.042166594	0.2781159	0.037518546	lebanon	middle east	12
771	6HppU9g6h1M	WHO declares Liberia Ebola-free	Liberia has been declared free from Ebola after no new cases were reported for over a month, the World Health Organisation has said. But there are still new cases in other parts of West Africa. Health officials are warning people they can’t afford to be complacent. Al Jazeera's Caroline Malone reports. More on our website: http://aljazeera.com Follow us on Twitter: http://twitter.com/AJEnglish Su…	0.0614298	2015-05-10T08:59:27.000Z	0.059392598	0.16256972	0.048096348	africa	africa	1
772	CoKoGzKctg8	Greece's ruling coalition divided over bailout deal	A Greek parliamentary debate on the massive new bailout deal has lasted through the night after repeated delays over procedure and dissent within the governing left-wing Syriza party. The draft deal for the $93bn package was to be voted on by MPs on Friday morning, hours before finance ministers from the eurozone were to meet in Brussels to study the agreement. Al Jazeera's John Psaropoulos repor…	0.0614522	2015-08-15T14:46:03.000Z	0.061452225	0.03605844	0.02755915	europe	europe	6
773	0QdGcJGLeoU	South Africa's poor get free healthcare on train	A train has been bringing hope to hundreds of thousands of poor South Africans who can't afford healthcare. The Pe-lo-pepa train has been chugging around the country for almost two decades. Al Jazeera's Tania Page reports from the Mooi River.	0.0614571	2013-12-28T20:07:52.000Z	0.06145712	0.38290077	0.23754409	africa	africa	1
774	NG-OqgTZWWE	Whistleblower on encryption and protecting your data - The Listening Post (Web Extra)	'It’s embarrassing for me to have to admit I don't encrypt...but I do have an excuse for it.' - Daniel Ellsberg Watch the full show online | http://aje.io/tpv4	0.0614773	2015-06-29T21:23:28.000Z	0.017864084	0.04689113	0.08439622	science & technology	science & technology	17
775	BDnQLSCUs6U	reVIEW: Best of the week's programmes on Al Jazeera (Mar 30-Apr 5)	Subscribe to our channel http://bit.ly/AJSubscribe Al Jazeera had many interesting and varied programmes on the channel this past week. Here are our top three picks: 1 - In 'Boycott Israel' People & Power discover whether an international boycott of Israeli goods and services can help end its occupation of Palestinian lands [http://aje.io/g4qm]. 2 - In 'Shadow City', Fault Lines examines New York…	0.0615217	2015-04-06T15:31:14.000Z	0.10898463	0.01316284	0.07603842	media	media	11
776	lmyEsHDJkvo	The Stream - Science on sacred land at Mauna Kea	Subscribe to our channel http://bit.ly/AJSubscribe On The Stream: How can astronomers and native Hawaiians share the space between science and spirituality? At Al Jazeera English, we focus on people and events that affect people's lives. We bring topics to light that often go under-reported, listening to all sides of the story and giving a 'voice to the voiceless.' Reaching more than 270 million …	0.0615408	2015-06-10T07:26:53.000Z	0.02879375	0.05248468	0.012345856	media	media	11
777	C0OMjzkScd0	earthrise - Fog Nets	Harvesting water from thin air in the foothills of the Andes.	0.0616206	2015-12-26T18:05:46.000Z	0.11524289	0.18004738	0.053246737	environment	environment & weather	5
778	u5p0fXMbgWk	US state limits use of antibiotics on animals	California is set to introduce strict new rules on the use of antibiotics in livestock production. There are growing concerns that the overuse of such drugs is contributing to the rising number of life-threatening human infections from antibiotic-resistant bacteria known as 'superbugs.' Al Jazeera's Tarek Bazley explains. Subscribe to our channel http://bit.ly/AJSubscribe Follow us on Twitter htt…	0.0616935	2015-10-12T09:17:07.000Z	0.06169351	0.1276703	0.10751016	united states	us & canada	19
779	9kbLV6ebdUc	Clean-up after Fiji's Cyclone Winston wreaks havoc	Fiji has launched a clean-up after the most powerful cyclone in the Pacific island-nation's history left a trail of destruction, killing at least six people, destroying homes and damaging infrastructure. Al Jazeera's Caroline Malone reports. - Subscribe to our channel: http://bit.ly/AJSubscribe - Follow us on Twitter: https://twitter.com/AJEnglish - Find us on Facebook: https://www.facebook.com/a…	0.0617853	2016-10-06T12:50:35.000Z	0.09102681	0.38568586	0.14342111	asia pacific	asia	3
780	C18Eg_IZWME	earthrise - How it works: Geothermal Electricity	The deeper you go into the earth's core, the hotter it becomes. Some of this vast energy is already harnessed by geothermal power plants which use steam from heated water deep underground to drive turbines and generate electricity.	0.0618202	2017-12-13T01:27:10.000Z	0.02347562	0.024778667999999997	0.0417637	environment	environment & weather	5
781	ShPJ51OjxGA	Discussing Egypt's constitutional crisis	Subscribe to our channel http://bit.ly/AJSubscribe Subscribe to our channel http://bit.ly/AJSubscribe Mahjoob Zweiri teaches contemporary history and politics of the Middle East at Qatar University here in Doha. He joined Al Jazeera to discuss the latest developments in Egypt's constitutional crisis. At Al Jazeera English, we focus on people and events that affect people's lives. We bring topics …	0.0618319	2012-12-01T05:25:16.000Z	0.061831903	0.031545993	0.004686452	egypt	middle east	12
782	_Wt-Xolpai8	Dutch court: Shell can be liable for Nigeria spills	A judge in the Hague ruled that the multinational can be held legally responsible for alleged pollution by its subsidiary in Nigeria. The ruling means other Dutch-based companies operating around the world can also be sued. Shell says it's 'disappointed' by the ruling. Chima Williams,a lawyer for Friends of the Earth which is the group backing the Nigerians in the case, says the decision is a pos…	0.0618762	2015-12-18T20:28:06.000Z	0.023584714	0.3011959	0.061350014	africa	africa	1
783	t2nVcLlAkXI	Mixed effects of oil price plunge in Asia	As Thailand benefits from less costs, fuel exporter and neighbour Malaysia faces decreased profit from price plunge. Al Jazeera's Scott Heidler reports from Bangkok.	0.0618838	2015-01-19T14:33:17.000Z	0.023536805	0.15339673	0.05930496	business & economy	business & economy	4
784	zgyCSEgIMoo	Spain hunts for Miguel De Cervantes's remains	Subscribe to our channel http://bit.ly/AJSubscribe Subscribe to our channel http://bit.ly/AJSubscribe Spanish historians are working to locate the remains of Spain's greatest literary figure, Miguel de Cervantes. The author, whose most famous book Don Quixote greated a new fiction genre, worked over the late 16th and early 17th centuries. He is believed to be buried inside a central Madrid conven…	0.061886	2014-04-29T01:15:47.000Z	0.06188601	0.31468058	0.0070593830000000015	europe	europe	6
785	DXIzxCiN0s0	Al Jazeera World - Journey Into The Unknown promo	The dramatic story of two Syrian refugees trying to reach Europe, one who almost drowns in the Mediterranean and the other who travels by land through Turkey. - Subscribe to our channel: http://aje.io/AJSubscribe - Follow us on Twitter: https://twitter.com/AJEnglish - Find us on Facebook: https://www.facebook.com/aljazeera - Check our website: http://www.aljazeera.com/	0.0618958	2016-09-20T14:06:16.000Z	0.061895784	0.021010844	0.020279175	middle east	middle east	12
786	NrzAzxt0lgA	Nigeria eases curfew in northeast	Subscribe to our channel http://bit.ly/AJSubscribe Subscribe to our channel http://bit.ly/AJSubscribe Round-the-clock curfew in Maiduguri relaxed as military claims gains in battle against Boko Haram fighters. Al Jazeera's Yvonne Ndege reports. At Al Jazeera English, we focus on people and events that affect people's lives. We bring topics to light that often go under-reported, listening to all s…	0.0619388	2013-05-22T01:42:40.000Z	0.06193875	0.117659405	0.010803367	media	media	11
787	xDukjCYgH88	The Cure - Simple Skin Grafting	Subscribe to our channel http://bit.ly/AJSubscribe A quick and painless skin harvesting technique is healing severe skin wounds. Worldwide, 347 million people have diabetes, and every 30 seconds one of them has a lower limb amputated. This is because diabetes can cause damage to the nerves and blood vessels, which puts people at risk of developing skin wounds that can become dangerously infected.	0.0620046	2016-08-31T14:32:09.000Z	0.13562594	0.24044870000000002	0.051448718	middle east	middle east	12
788	SVKyvieBoKA	Al Jazeera World - Ahalil: Music of the Red Oasis promo	Subscribe to our channel http://bit.ly/AJSubscribe The story of Ahalil music, a mystical style so integral to the life of the Algerian oasis of Gourara that it’s felt to be of global cultural significance.	0.0620436	2015-02-16T18:40:25.000Z	0.037869804	0.06350496	0.038131345	arts & culture	arts & culture	2
789	DV4PUyZVrU0	Conflicting reports on DRC death toll	There have been clashes between government soldiers and rebels in the Democratic Republic of Congo. Several people are known to have died, including civilians, but the military is keeping the death toll a secret. Al Jazeera's Malcolm Webb reports from the city of Goma.	0.0620508	2013-08-28T18:34:30.000Z	0.06205077	0.041559976	0.071582645	africa	africa	1
790	JfN1ALLQgfA	Saudi coalition denies use of illegal cluster bombs in Yemen	Saudi-led coalition spokesman Ahmed Asiri told Al Jazeera that the HRW report accusing forces of using illegal cluster munitions is inaccurate. Subscribe to our channel http://bit.ly/AJSubscribe Follow us on Twitter https://twitter.com/AJEnglish Find us on Facebook https://www.facebook.com/aljazeera Check our website http://www.aljazeera.com/	0.0621034	2015-08-30T09:08:10.000Z	0.0153322	0.4005446	0.12033981	middle east	middle east	12
791	arWkXpF_sgQ	Attacks shut down several of Libya's oil fields	Libya's national oil company has shut down production because of the escalating violence in the country. Libya depends on oil for nearly all its income and the UN-recognised administration in Tobruk has made an urgent appeal for help. Talks due to take place in Morocco to try and restore peace have been delayed. Al Jazeera's Osama bin Javaid reports. More on our website: http://aljazeera.com Foll…	0.062128	2015-03-05T15:08:58.000Z	0.062128045	0.30438584	0.11518236	libya	africa	1
792	C9NnOcJwk4o	#Yosoy132: Rodrigo Serrano Ibero	Description : Drug violence is raging in key parts of Mexico, poverty is wide-spread and young people have few options for their future. Now many are concerned their country's main television channels are trying to skew the outcome of the July 1 presidential election. They are fed up and have started youth movement called #YoSoy132, which aims to fundamentally change Mexico's political culture. O…	0.0621972	2012-06-12T11:16:27.000Z	0.062197175		0.13158146	latin america	latin america	10
793	0OIGk41Q3z4	Interview with Srebrenica survivor: Muhamed Durakovic	Subscribe to our channel http://bit.ly/AJSubscribe There was a shortage of food, water, medical supplies and space for living. It looked more like one huge concentration camp. At Al Jazeera English, we focus on people and events that affect people's lives. We bring topics to light that often go under-reported, listening to all sides of the story and giving a 'voice to the voiceless.' Reaching mor…	0.0623081	2012-12-04T18:23:29.000Z	0.07232501	0.070806004	0.01965091	science & technology	science & technology	17
794	m6iLy-_3qAk	Trump remarks dominate talk at US auto show	President-elect Donald Trump tweeted praise on Monday for Ford and Fiat Chrysler, which are both investing in plants in the US rather than in Mexico. His remarks were a major talking point at the North American International Auto Show in Detroit. Al Jazeera’s John Hendren reports from Detroit. - Subscribe to our channel: http://aje.io/AJSubscribe - Follow us on Twitter: https://twitter.com/AJEngl…	0.06236	2017-01-11T03:44:28.000Z	0.046674978		0.025051067000000003	donald trump	us & canada	19
795	MrTEehfXM-Y	New curvy Samsung phone goes on sale	Samsung's latest mobile device has gone on sale in South Korea. The thousand-dollar smartphone has many unique features that could change the look and feel of these devices forever. Al Jazeera's Harry Fawcett reports from South Korea's largest tech fair.	0.0625572	2013-10-10T16:36:48.000Z	0.06255722	0.11095601	0.009712421	asia pacific	asia	3
796	F1xvKBGzQGA	Divided loyalties in Brazil's World Cup	Brazil is one of the most ethnically diverse countries in the world. So, when it comes to supporting a team during the World Cup, many fans confess to having divided loyalties. Al Jazeera's Gabriel Elizondo reports from Sao Paulo. Subscribe to our channel http://bit.ly/AJSubscribe Follow us on Twitter https://twitter.com/AJEnglish Find us on Facebook https://www.facebook.com/aljazeera Check our w…	0.0626625	2014-07-01T00:15:25.000Z	0.062662534	0.01123091	0.043775592	africa	africa	1
797	TUEi8AelPpE	Andrew Simmons live on Reddit for Syria Q&A	Subscribe to our channel http://bit.ly/AJSubscribe Subscribe to our channel http://bit.ly/AJSubscribe Al Jazeera's Andrew Simmons, who just came back from Syria, will be live on Reddit.com on October 3 to answer your questions. Now on the Turkish side of the border, Simmons will be online from 15:30 GMT, October 3, on Reddit's 'IAmA' page. For more details, see http://aljazeera.com/simmonsreddit …	0.0626715	2012-10-05T06:25:12.000Z	0.06267153	0.04775444	0.0076105869999999985	europe	europe	6
798	JSQabKWK6mI	South Korea delays Sewol ferry lift	South Korea's government says the operation to lift the Sewol ferry from the sea floor has been delayed again. The Sewol sank off the southern coast in 2014, killing more than 300 people, the vast majority teenagers on a school trip. The ship was supposed to have been lifted this month but it's now been pushed back to October. Al Jazeera's Harry Fawcett reports from Jindo, South Korea. - Subscrib…	0.0627673	2016-09-28T02:37:22.000Z	0.06379483	0.108580224	0.060120042	asia pacific	asia	3
799	G7jewQjfhh0	LA museum showcases velvet paintings	It might not be hanging up in the Louvre but if it's a velvet painting, you'll most likely find it at a hidden Los Angeles museum. Velveteria - is now home to 3000 pieces of modern art, which has come a long way from its religious origins in ancient Kashmir. Al Jazeera's Rob Reynolds reports from Los Angeles.	0.0629886	2016-07-05T23:41:13.000Z	0.016443804	0.0043262676	0.02220464	arts & culture	arts & culture	2
800	iLOvtyzvTQQ	On The Ground: China industrial zone blast in Tianjin	Explosions in Tianjin's industrial zone kill at least 44 people and injure hundreds more, with 36 firemen reported missing. Al Jazeera's Adrian Brown reports live from the epicenter of the explosion. Subscribe to our channel http://bit.ly/AJSubscribe Follow us on Twitter https://twitter.com/AJEnglish Find us on Facebook https://www.facebook.com/aljazeera Check our website: http://www.aljazeera.co…	0.0629897	2015-08-13T11:51:59.000Z	0.0115387095	0.09960931	0.205163	africa	africa	1
801	CtYqqqblnrk	Nepal cremates hundreds of unknown quake victims	For those who survived the earthquake, it's been hard to get medical help. In the capital Kathmandu, volunteers have been forced to cremate hundreds of unknown victims. Al Jazeera's Faiz Jamil reports on how people are coping in the Nepalese capital. Subscribe to our channel http://bit.ly/AJSubscribe Follow us on Twitter https://twitter.com/AJEnglish Find us on Facebook https://www.facebook.com/a…	0.0630048	2015-04-27T17:11:47.000Z	0.063004844	0.070364386	0.04117153	africa	africa	1
802	1-3QgeVmISI	Niger building rail link to Benin's largest city	The government in Niger is building a railway link from the capital Niamey to neighbouring Benin’s largest city, Cotonou. The $1.8bn project was first mooted during the 1930s when the country was under French rule. Once completed it will give Niger access to ports on the Atlantic. Al Jazeera's Mohammed Vall reports from Niamey. Subscribe to our channel http://bit.ly/AJSubscribe Follow us on Twitt…	0.063031	2018-01-16T05:57:03.000Z	0.02637537	0.28898308	0.26239362	africa	africa	1
803	fWpwgTN30os	African Music Awards celebrates contemporary talent	The best of African contemporary music is being celebrated at the MTV African Music Awards in Johannesburg. The ceremony is a chance to promote emerging talent both at home and abroad. But it is also being seen as an opportunity to show the world a different side of Africa. Al Jazeera's Haru Mutasa reports from the event. - Subscribe to our channel: http://aje.io/AJSubscribe - Follow us on Twitte…	0.0630415	2016-10-24T17:51:48.000Z	0.08915031	0.0039807106	0.003767632	africa	africa	1
804	4AJKX8TSZuM	The Cure - Impact (tease) promo	Presented by practicing medics The Cure explores the frontiers of world health by covering cutting-edge scientific and medical breakthroughs all over the world. - Subscribe to our channel: http://bit.ly/AJSubscribe - Follow us on Twitter: https://twitter.com/AJEnglish - Find us on Facebook: https://www.facebook.com/aljazeera - Check our website: http://www.aljazeera.com/	0.0630487	2016-05-18T12:23:02.000Z	0.0630487	0.079836756	0.00943757	media	media	11
805	tCpo4Wd_u5M	Putin critic Khodorkovsky goes free	Mikhail Khodorkovsky, a former oil magnate and a prominent Kremlin critic, has been released from jail in the wake of a decree issued by Russian President Vladimir Putin. Khodorkovsky flew to Germany on Friday after his release. Al Jazeera's Peter Sharp reports from Moscow.	0.0630664	2013-12-21T13:15:45.000Z	0.063066445	0.10339464	0.039711382	europe	europe	6
[truncated: 28,718 more rows]

## Sheet: key1
topic	superclass					Superclass_N	Superclass		Number of Topics in Superclass	Number of videos in Superclass
europe	europe					1	africa	1	4	4819
iraq	middle east					2	arts & culture	2	1	414
egypt	middle east					3	asia	3	12	3338
[truncated: 72 more rows]

## Sheet: key2
	superclass	topic		superclass	topic
[truncated: 38 more rows]

[truncated: 9 more sheets: DATA, Data Descr, Output_ANOVA&Bonferroni, Output_Regressions, Matrix Bonf&Regressions, Output_different methods, Summary_different methods, Table 1, Table 2]
